# Supplementary material
Source: PubMed Central journal article supplement (PMC5476940)

## **Nickel-Catalyzed Reduction of Secondary and Tertiary Amides**

Bryan J. Simmons, Marie Hoffmann, Jaeyeon Hwang, Moritz K. Jackl, Neil K. Garg  
*Department of Chemistry and Biochemistry, University of California  
Los Angeles, California 90095*

### Supporting Information – Table of Contents

|                                                                            |            |
|----------------------------------------------------------------------------|------------|
| <b>Materials and Methods .....</b>                                         | <b>S2</b>  |
| <b>Experimental Procedures .....</b>                                       | <b>S3</b>  |
| <b>A. Syntheses of Amide Substrates.....</b>                               | <b>S3</b>  |
| <b>B. Initial Survey of Amide Substrates with Phenylsilane.....</b>        | <b>S7</b>  |
| <b>C. Relevant Control Experiments for the Reduction of Amide 7 .....</b>  | <b>S9</b>  |
| <b>D. Scope of Methodology .....</b>                                       | <b>S9</b>  |
| <b>E. Synthesis of PhSiD<sub>3</sub>.....</b>                              | <b>S18</b> |
| <b>F. Reduction of Amino Acid Derivatives using PhSiD<sub>3</sub>.....</b> | <b>S19</b> |
| <b>G. Verification of Enantiopurity – Racemic Compound Synthesis .....</b> | <b>S21</b> |
| <b>H. Verification of Enantiopurity – er and dr determination .....</b>    | <b>S25</b> |
| <b>I. Procedure for Reduction Performed on 1.0 mmol Scale .....</b>        | <b>S34</b> |
| <b>References.....</b>                                                     | <b>S35</b> |
| <b><sup>1</sup>H NMR Spectra .....</b>                                     | <b>S37</b> |
| <b><sup>13</sup>C NMR Spectra... ..</b>                                    | <b>S81</b> |

**Materials and Methods.** Unless stated otherwise, reactions were conducted in flame-dried glassware under an atmosphere of nitrogen and commercially obtained reagents were used as received. Non-commercially available substrates were synthesized following protocols specified in Section A of the Experimental Procedures. Prior to use, toluene was purified by distillation and taken through five freeze-pump-thaw cycles. NiCl<sub>2</sub>(dme) and LiAlD<sub>4</sub> was obtained from Strem Chemicals. Hexamethylbenzene and PhSiH<sub>3</sub> were obtained from Alfa Aesar and used as received. Carboxylic acids **SI-1**, **SI-3**, **SI-8**, amines **SI-6**, **SI-12**, **rac-SI-6**, **rac-SI-45**, **rac-SI-46**, and lactam **SI-37** were obtained from Combi-Blocks. Carboxylic acid **SI-5** was obtained from Eastman Organic. Lactams **SI-38**, **SI-39**, and PhSiCl<sub>3</sub> were obtained from Sigma–Aldrich and used as received. Benzylamine was obtained from Acros Organics and used as received. Reaction temperatures were controlled using an IKAmag temperature modulator, and unless stated otherwise, reactions were performed at elevated temperatures (approximately 115 °C). Thin-layer chromatography (TLC) was conducted with EMD gel 60 F254 pre-coated plates (0.25 mm for analytical chromatography and 0.50 mm for preparative chromatography) and visualized using a combination of UV, anisaldehyde, iodine, and potassium permanganate staining techniques. Silicycle Siliaflash P60 (particle size 0.040–0.063 mm) was used for flash column chromatography. <sup>1</sup>H NMR spectra were recorded on Bruker spectrometers (at 300, 400 and 500 MHz) and are reported relative to residual solvent signals. Data for <sup>1</sup>H NMR spectra are reported as follows: chemical shift (δ ppm), multiplicity, coupling constant (Hz), integration. Data for <sup>2</sup>H NMR spectra are reported in terms of chemical shift (at 76 MHz). Data for <sup>13</sup>C NMR are reported in terms of chemical shift (at 75 and 125 MHz). IR spectra were recorded on a Perkin-Elmer UATR Two FT-IR spectrometer and are reported in terms of frequency absorption (cm<sup>-1</sup>). High-resolution mass spectra were obtained on Thermo Scientific™ Exactive Mass Spectrometer with DART ID-CUBE. Determination of enantiopurity was carried out on a Mettler Toledo SFC (supercritical fluid chromatography) using a Daicel ChiralPak column.

## Experimental Procedures

### A. Syntheses of Amide Substrates

**Representative Procedure A for the synthesis of amide substrates from Figure 2. (SI-2 is used as an example).**

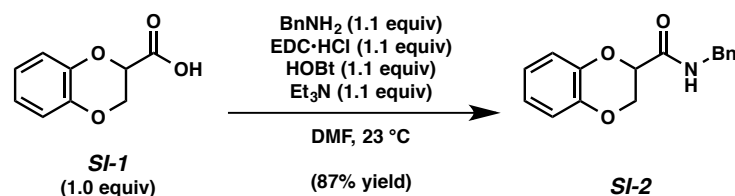

**Amide SI-2.** To a solution of carboxylic acid **SI-1** (2.00 g, 11.1 mmol, 1.0 equiv), HOBt (1.87 g, 12.2 mmol, 1.1 equiv), and triethylamine (1.70 mL, 12.2 mmol, 1.1 equiv) in DMF (111.0 mL, 0.1 M) at 23 °C was added EDC·HCl (1.89 g, 12.2 mmol, 1.1 equiv) followed by benzylamine (1.3 mL, 12.2 mmol, 1.1 equiv) dropwise over 1 min under a N<sub>2</sub> atmosphere. After stirring at 23 °C for 18 h, the reaction was diluted with deionized water (100 mL) and transferred to a separatory funnel with EtOAc (75 mL). The layers were separated and the aqueous layer was extracted with EtOAc (3 x 75 mL). The organic layers were combined and washed with water (3 x 75 mL), dried over Na<sub>2</sub>SO<sub>4</sub>, and the volatiles were removed under reduced pressure. The resulting crude residue was purified by flash chromatography (10:1 Hexanes:EtOAc → 2:1 Hexanes:EtOAc) to yield amide **SI-2** (2.6 g, 87% yield) as a white solid. Amide **SI-2**: mp: 130–131 °C; R<sub>f</sub> 0.30 (3:1 Hexanes:EtOAc); <sup>1</sup>H NMR (500 MHz, CDCl<sub>3</sub>): δ 7.35–7.27 (m, 3H), 7.25–7.23 (m, 2H), 6.94–6.85 (m, 5H), 4.75 (dd, *J* = 7.3, 2.7, 1H), 4.58 (dd, *J* = 11.4, 2.7, 1H), 4.52 (d, *J* = 6.0, 2H), 4.23 (dd, *J* = 11.4, 7.3, 1H); <sup>13</sup>C NMR (125 MHz, CDCl<sub>3</sub>): δ 167.3, 143.5, 141.7, 137.6, 128.9, 127.9, 127.8, 122.6, 122.1, 117.8, 117.3, 73.4, 65.6, 43.3; IR (film): 3029, 2924, 2876, 1670, 1493 cm<sup>-1</sup>; HRMS-APCI (*m/z*) [M + H]<sup>+</sup> calcd for C<sub>16</sub>H<sub>16</sub>NO<sub>3</sub>, 270.11247; found 270.11082.

**Representative Procedure B for the synthesis of amide substrates from Figure 2. (SI-4 is used as an example).**

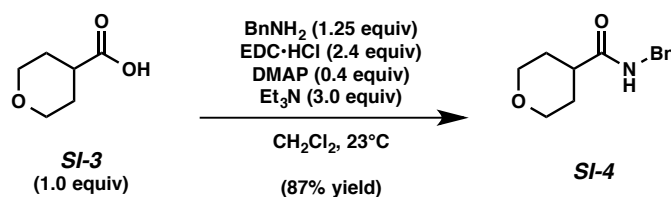

**Amide SI-4.** To a solution of carboxylic acid **SI-3** (500.0 mg, 3.84 mmol, 1.0 equiv), EDC·HCl (1.77 g, 9.22 mmol, 2.4 equiv), and DMAP (188.0 mg, 1.54 mmol, 0.4 equiv) in CH<sub>2</sub>Cl<sub>2</sub> (12 mL, 0.35 M) was added Et<sub>3</sub>N (1.6 mL, 11.52 mmol, 3.0 equiv) followed by benzylamine (525.0 μL, 4.80 mmol, 1.25 equiv) dropwise over 1 min under a N<sub>2</sub> atmosphere. After stirring at 23 °C for 18 h, the reaction mixture was transferred to a separatory funnel with EtOAc (30 mL) and washed with 1.0 M aqueous HCl (2 x 10 mL), followed by 1.0 M aqueous NaOH (2 x 10 mL), and deionized water (10 mL). The organic layer was dried over Na<sub>2</sub>SO<sub>4</sub>, and the volatiles were removed under reduced pressure. The resulting crude residue was purified by flash chromatography (1:15 Hexanes:EtOAc) to yield amide **SI-4** (775.5 mg, 87% yield) as a white solid. Amide **SI-4**: mp: 116–117 °C; *R<sub>f</sub>* 0.46 (1:4 Hexanes:EtOAc); <sup>1</sup>H NMR (500 MHz, CDCl<sub>3</sub>): δ 7.35–7.33 (m, 2H), 7.30–7.27 (m, 3H), 5.71 (br. s, 1H), 4.46 (d, *J* = 5.7, 2H), 4.04–4.00 (m, 2H), 3.41 (td, *J* = 11.5, 2.8, 2H), 2.40–2.34 (m, 1H), 1.88–1.82 (m, 2H), 1.81–1.77 (m, 2H); <sup>13</sup>C NMR (125 MHz, CDCl<sub>3</sub>): 174.1, 138.3, 128.9, 127.9, 127.8, 67.4, 43.7, 42.4, 29.4; IR (film): 3064, 2951, 2842, 1635, 1541 cm<sup>-1</sup>; HRMS-APCI (*m/z*) [M + H]<sup>+</sup> calcd for C<sub>13</sub>H<sub>18</sub>NO<sub>2</sub>, 220.13321; found 220.13214.

**Representative Procedure C for the synthesis of amide substrates from Figure 5. (SI-7 is used as an example).**

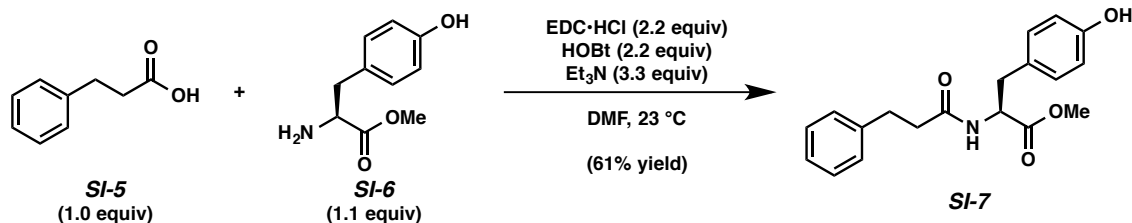

**Amide SI-7.** To a solution of carboxylic acid **SI-5** (500.0 mg, 3.33 mmol, 1.0 equiv), HOBT (988.9 mg, 7.33 mmol, 2.2 equiv), and EDC·HCl (1.41 g, 7.33 mmol, 2.2 equiv) in DMF (16.6 mL, 0.2 M) at 23 °C was added amine **SI-6** (714.9 mg, 3.66 mmol, 1.1 equiv), followed by

triethylamine (1.50 mL, 10.9 mmol, 3.3 equiv) under a N<sub>2</sub> atmosphere. After stirring at 23 °C for 18 h, the reaction was diluted with deionized water (50 mL) and transferred to a separatory funnel with EtOAc (40 mL). The layers were separated and the aqueous layer was extracted with EtOAc (3 x 40 mL). The organic layers were combined and washed with water (3 x 40 mL), dried over Na<sub>2</sub>SO<sub>4</sub>, and the volatiles were removed under reduced pressure. The resulting crude residue was purified by flash chromatography (3:1 Hexanes:EtOAc → 1:1 Hexanes:EtOAc) to yield amide **SI-7** (662.1 mg, 61% yield) as a white solid. Amide **SI-7**: mp: 89–92 °C; R<sub>f</sub> 0.25 (1:1 Hexanes:EtOAc); <sup>1</sup>H NMR (500 MHz, CD<sub>2</sub>Cl<sub>2</sub>): δ 7.29–7.26 (m, 2H), 7.20–7.17 (m, 3H), 6.83–6.82 (m, 2H), 6.71–6.68 (m, 2H), 5.94 (br. d, *J* = 7.8, 1H), 4.79 (dt, *J* = 7.8, 5.9, 1H), 3.69 (s, 3H), 2.99 (dd, *J* = 13.8, 5.6, 1H), 2.93 (dd, *J* = 13.8, 5.6, 1H), 2.91–2.88 (m, 2H), 2.53–2.42 (m, 2H); <sup>13</sup>C NMR (125 MHz, CDCl<sub>3</sub>): δ 172.1, 171.7, 154.9, 140.8, 130.4, 128.6, 128.4, 127.5, 126.3, 115.5, 53.1, 52.4, 38.2, 37.1, 31.4; IR (film): 3287, 3026, 2951, 1736, 1647 cm<sup>-1</sup>; HRMS-APCI (*m/z*) [M + H]<sup>+</sup> calcd for C<sub>19</sub>H<sub>20</sub>NO<sub>4</sub>, 326.13937, found 326.13868. [α]<sub>D</sub><sup>27.6</sup> +60.00° (c = 0.10, CH<sub>2</sub>Cl<sub>2</sub>).

Note: Supplementary information for the syntheses of some amides used in Figures 2, 3, 4, and 5 have previously been reported: **7**,<sup>1</sup> **SI-14**,<sup>2</sup> **SI-15**,<sup>3</sup> **SI-16**,<sup>4</sup> **SI-17**,<sup>5</sup> **SI-18**,<sup>6</sup> **SI-19**,<sup>7</sup> **SI-20**,<sup>2</sup> **SI-21**,<sup>3</sup> **SI-22**,<sup>8</sup> **SI-23**,<sup>1</sup> **SI-24**,<sup>9</sup> **SI-25**,<sup>10</sup> **SI-26**,<sup>10</sup> **SI-27**,<sup>11</sup> **SI-28**,<sup>12</sup> **SI-29**,<sup>13</sup> **SI-30**,<sup>14</sup> **SI-31**,<sup>15</sup> **SI-32**,<sup>16</sup> **SI-33**,<sup>17</sup> **SI-34**,<sup>18</sup> **SI-35**,<sup>19</sup> **SI-36**,<sup>20</sup> **SI-42**,<sup>21</sup> **SI-43**,<sup>22</sup> **SI-44**.<sup>23</sup> Syntheses for the remaining substrates shown in Figures 3 and 6 are as follows:

*Any modifications of the conditions shown in the representative procedures above are specified in the following schemes.*

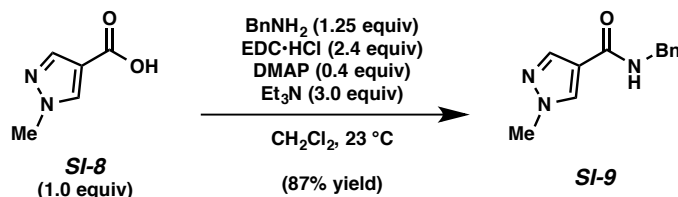

**Amide SI-9.** Following representative procedure B. Purification by flash chromatography (9:1 EtOAc:CHCl<sub>3</sub>) yielded amide **SI-9** (810.2 mg, 87% yield) as a white solid. Amide **SI-9**: mp: 157–158 °C; R<sub>f</sub> 0.27 (1:4 Hexanes:EtOAc); <sup>1</sup>H NMR (500 MHz, CDCl<sub>3</sub>): δ 7.83 (s, 1H), 7.70 (s, 1H), 7.36–7.32 (m, 4H), 7.30–7.27 (m, 1H), 6.06 (s, 1H), 4.59 (d, *J* = 5.6, 2H), 3.91 (s, 3H); <sup>13</sup>C NMR (125 MHz, CDCl<sub>3</sub>): δ 162.4, 138.4, 137.8, 131.9, 128.9, 128.0, 127.7, 118.8, 43.6, 39.4; IR

(film): 3111, 3064, 2941, 1630, 1566  $\text{cm}^{-1}$ ; HRMS-APCI ( $m/z$ )  $[\text{M} + \text{H}]^+$  calcd for  $\text{C}_{12}\text{H}_{14}\text{N}_3\text{O}$ , 216.11314; found 216.11201.

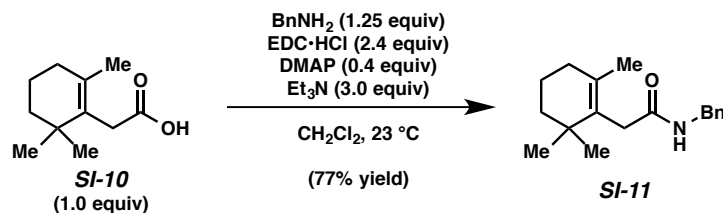

**Amide SI-11.** Following representative procedure B. Purification by flash chromatography (4:1 Hexanes:EtOAc) yielded amide **SI-11** (230.0 mg, 77% yield) as a white solid. Amide **SI-11**: mp: 78–80 °C;  $R_f$  0.32 (3:1 Hexanes:EtOAc);  $^1\text{H}$  NMR (500 MHz,  $\text{C}_6\text{D}_6$ ):  $\delta$  7.13–7.09 (m, 4H), 7.05–7.02 (m, 1H), 5.62 (br. s, 1H), 4.33 (d,  $J = 5.9$ , 2H), 2.99 (s, 2H), 1.69 (t,  $J = 6.4$ , 2H), 1.42 (s, 3H), 1.41–1.38 (m, 2H), 1.31–1.28 (m, 2H), 0.90 (s, 6H);  $^{13}\text{C}$  NMR (125 MHz,  $\text{CDCl}_3$ ):  $\delta$  171.3, 138.4, 132.9, 132.5, 128.7, 127.5, 127.4, 43.5, 39.4, 36.7, 34.9, 32.6, 28.1, 20.5, 19.1; IR (film): 3299, 2926, 2865, 1640, 1516  $\text{cm}^{-1}$ ; HRMS-APCI ( $m/z$ )  $[\text{M} + \text{H}]^+$  calcd for  $\text{C}_{18}\text{H}_{26}\text{NO}$ , 272.19901; found 272.20089.

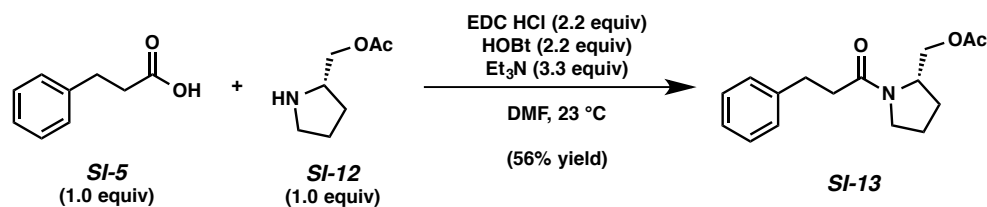

**Amide SI-13.** Following representative procedure C. Purification by flash chromatography (1:1 Hexanes:EtOAc) yielded amide **SI-13** (234.0 mg, 56% yield) as a colorless oil. Amide **SI-13** was observed as a 2.9:1 mixture of rotational isomers in  $\text{CDCl}_3$ . Amide **SI-13**:  $R_f$  0.29 (1:1 Hexanes:EtOAc);  $^1\text{H}$  NMR (500 MHz,  $\text{CDCl}_3$ , **Major rotational isomer**):  $\delta$  7.26–7.23 (m, 2H), 7.20–7.14 (m, 3H), 4.34–4.31 (m, 1H), 4.14 (dd,  $J = 10.7$ , 3.8, 1H), 4.06 (dd,  $J = 10.7$ , 6.9, 1H), 3.35–3.31 (m, 1H), 3.28–3.23 (m, 1H), 2.99–2.92 (m, 2H), 2.53 (t,  $J = 7.7$ , 2H), 2.01 (s, 3H), 1.95–1.77 (m, 4H);  $^1\text{H}$  NMR (500 MHz,  $\text{CDCl}_3$ , **Minor rotational isomer**):  $\delta$  7.26–7.26 (m, 2H), 7.20–7.14 (m, 3H), 3.94 (dd,  $J = 10.7$ , 5.5, 1H), 3.91–3.86 (m, 1H), 3.76 (dd,  $J = 10.7$ , 7.4, 1H), 3.51 (dt,  $J = 12.3$ , 8.5, 1H), 3.43–3.38 (m, 1H), 2.99–2.92 (m, 2H), 2.66 (t,  $J = 7.7$ , 2H), 1.99 (s, 3H), 1.95–1.77 (m, 4H);  $^{13}\text{C}$  NMR (100 MHz,  $\text{CDCl}_3$ , **Major rotational isomer**):  $\delta$  171.4, 170.9, 141.5, 128.6, 128.6, 126.2, 64.0, 55.5, 47.2, 36.9, 31.2, 27.4, 24.1, 21.0;  $^{13}\text{C}$  NMR

(100 MHz, CDCl<sub>3</sub>, **Minor rotational isomer**):  $\delta$  171.6, 170.7, 141.4, 128.6, 128.6, 126.2, 64.7, 55.8, 45.7, 36.2, 31.8, 28.7, 21.8, 20.9; IR (film): 3474, 2955, 2878, 1737, 1636 cm<sup>-1</sup>; HRMS-APCI (*m/z*) [M + H]<sup>+</sup> calcd for C<sub>16</sub>H<sub>22</sub>NO<sub>3</sub>, 276.15906; found 276.15942. [ $\alpha$ ]<sup>29.6</sup><sub>D</sub> -29.33° (c = 0.10, CH<sub>2</sub>Cl<sub>2</sub>).

## B. Initial Survey of Amide Substrates with Phenylsilane

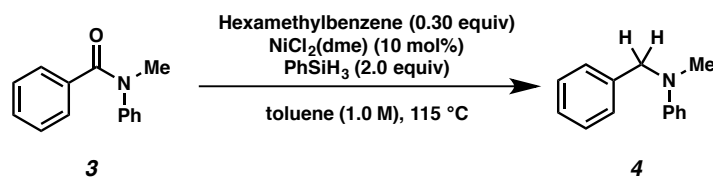

**Representative Procedure for the reduction of amides from Figure 2 and Figure SI-1 (reduction of amide 3 is used as an example).** A 1-dram vial was charged with a magnetic stir bar, flame-dried under reduced pressure, and allowed to cool under a N<sub>2</sub> atmosphere. Amide substrate **3** (42.3 mg, 0.200 mmol, 1.0 equiv), NiCl<sub>2</sub>(dme) (4.4 mg, 0.0200 mmol, 10 mol%), and hexamethylbenzene (9.7 mg, 0.0600 mmol, 0.30 equiv) were added, and the vial was flushed with N<sub>2</sub> for 5 min. PhSiH<sub>3</sub> (49.4  $\mu$ L, 0.400 mmol, 2.0 equiv) was added under a N<sub>2</sub> atmosphere via syringe followed by toluene (200  $\mu$ L, 1.0 M). The vial was then capped with a Teflon-lined screw cap under a flow of N<sub>2</sub>. The reaction mixture was then placed in a pre-heated aluminum block and allowed to stir at 115 °C for 24 h. After cooling to room temperature, the reaction mixture was transferred to a separatory funnel with EtOAc (3 mL) and basified with 1.0 M aqueous NaOH (4 mL). The layers were separated and the aqueous layer was extracted with EtOAc (3 x 5 mL). The combined organic layers were washed with saturated aqueous NaCl (5 mL). The volatiles were removed under reduced pressure, and the yield was determined by <sup>1</sup>H NMR analysis with hexamethylbenzene as an internal standard.

**Figure SI-1.** Initial Survey of Amide Substrates with Phenylsilane<sup>a</sup>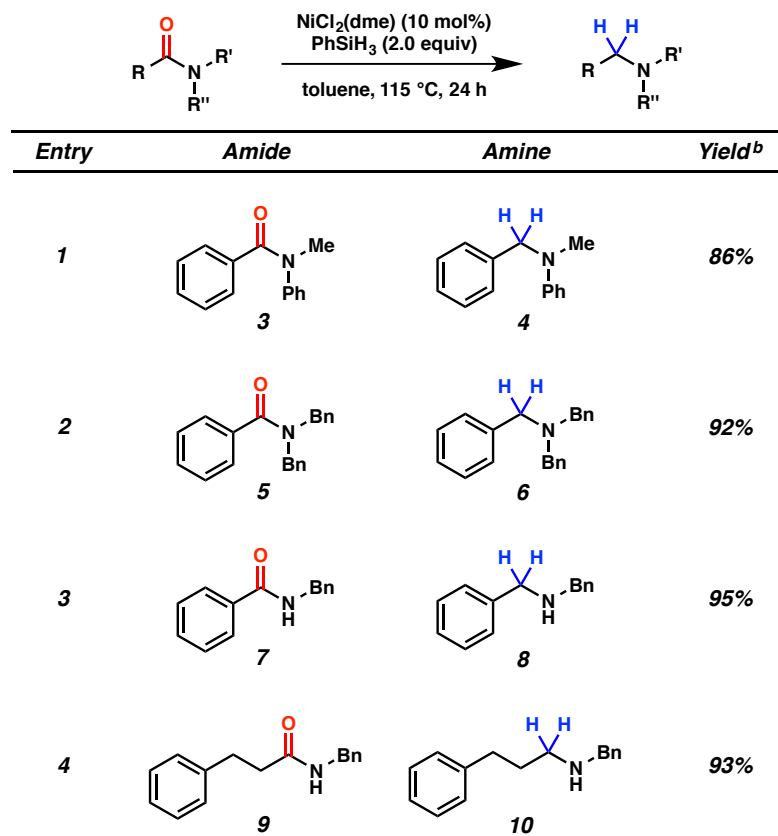

<sup>a</sup> Conditions unless otherwise stated: NiCl<sub>2</sub>(dme) (10 mol%), substrate (1.0 equiv, 0.2 mmol), PhSiH<sub>3</sub> (2.0 equiv), and toluene (1.0 M) at 115 °C for 24 h in a sealed vial. <sup>b</sup> Yields determined by <sup>1</sup>H NMR analysis using hexamethylbenzene as an internal standard.



## C. Relevant Control Experiments for the Reduction of Amide 7

Figure SI-2. Relevant Control Experiments in the Reduction of Amide 7<sup>a</sup>
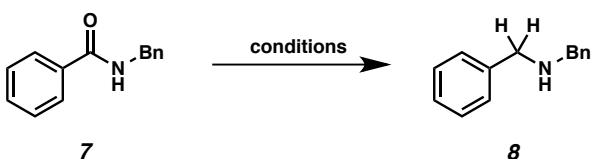

| Reaction Conditions                                                                                 | Experimental Results |     |
|-----------------------------------------------------------------------------------------------------|----------------------|-----|
|                                                                                                     | 7                    | 8   |
| NiCl <sub>2</sub> (dme) (10 mol%), PhSiH <sub>3</sub> (2.0 equiv),<br>toluene (1.0 M), 115 °C, 24 h | 0%                   | 95% |
| <b>Control Experiments:</b>                                                                         |                      |     |
| PhSiH <sub>3</sub> (2.0 equiv),<br>toluene (1.0 M), 115 °C, 24 h                                    | 98%                  | 0%  |
| NiCl <sub>2</sub> (dme) (10 mol%),<br>toluene (1.0 M), 115 °C, 24 h                                 | 100%                 | 0%  |

<sup>a</sup> Yields were determined by <sup>1</sup>H NMR analysis using hexamethylbenzene as an internal standard.

## D. Scope of Methodology

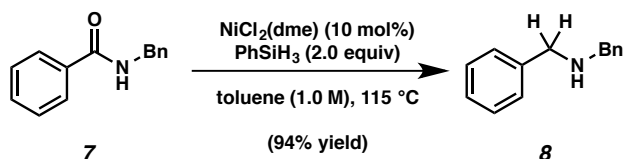

**Representative Procedure (reduction of amide 7 is used as an example). Amine 8.** A 1-dram vial was charged with a magnetic stir bar, flame-dried under reduced pressure, and allowed to cool under a N<sub>2</sub> atmosphere. Amide substrate 7 (42.3 mg, 0.200 mmol, 1.0 equiv) and NiCl<sub>2</sub>(dme) (4.4 mg, 0.0200 mmol, 10 mol%) was added, and the vial was flushed with N<sub>2</sub>. PhSiH<sub>3</sub> (49.4 μL, 0.4000 mmol, 2.0 equiv) was added under a N<sub>2</sub> atmosphere via syringe followed by toluene (200 μL, 1.0 M). The vial was then capped with a Teflon-lined screw cap under a flow of N<sub>2</sub>. The reaction mixture was then placed in a pre-heated aluminum block and allowed to stir at 115 °C for 24 h. After cooling to room temperature, the reaction mixture was transferred to a separatory funnel with EtOAc (3 mL) and basified with 1.0 M aqueous NaOH (4 mL). The layers were separated and the aqueous layer was extracted with EtOAc (3 x 5 mL). The combined organic layers were washed with saturated aqueous NaCl (5 mL). The volatiles were removed under reduced pressure, and the crude residue was purified by flash chromatography

(1:1 Hexanes:EtOAc) to yield amine **8** (94% yield, average of two experiments) as a colorless oil. Amine **8**:  $R_f$  0.36 (1:1 Hexanes:EtOAc). Spectral data match those previously reported.<sup>24</sup>

Any modifications of the conditions shown in the representative procedure above are specified in the following schemes, which depict all of the results shown in Figures 2, 3, and 4.

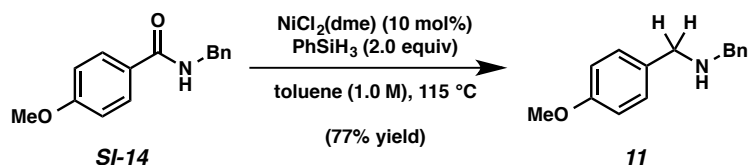

**Amine 11.** Purification by flash chromatography (3:1 Hexanes:EtOAc, 2% Et<sub>3</sub>N) yielded amine **11** (77% yield, average of two experiments) as a colorless oil. Amine **11**:  $R_f$  0.41 (4:1 Hexanes:EtOAc, 2% Et<sub>3</sub>N). Spectral data match those previously reported.<sup>25</sup>

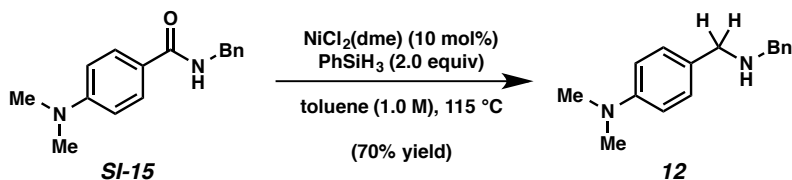

**Amine 12.** Purification by flash chromatography (1:1 CH<sub>2</sub>Cl<sub>2</sub>:CH<sub>3</sub>CN, 2% Et<sub>3</sub>N) yielded amine **12** (70% yield, average of two experiments) as a colorless oil. Amine **12**:  $R_f$  0.50 (1:1 CH<sub>2</sub>Cl<sub>2</sub>:CH<sub>3</sub>CN, 2% Et<sub>3</sub>N). Spectral data match those previously reported.<sup>26</sup>

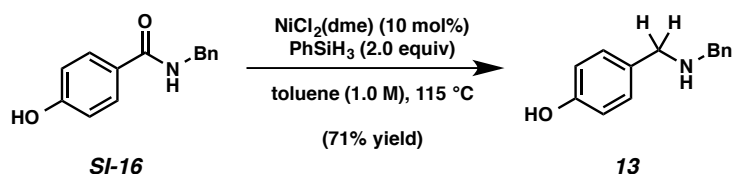

**Amine 13.** Purification by flash chromatography (EtOAc, 2% Et<sub>3</sub>N) yielded amine **13** (71% yield, average of two experiments) as a white solid. Amine **13**:  $R_f$  0.52 (EtOAc, 2% Et<sub>3</sub>N). Spectral data match those previously reported.<sup>27</sup>

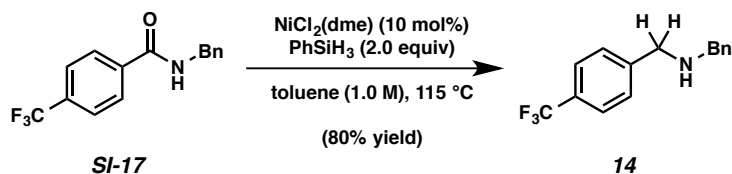

**Amine 14.** Purification by flash chromatography (1:1 Hexanes:EtOAc) yielded amine **14** (80% yield, average of two experiments) as a colorless oil. Amine **14**:  $R_f$  0.60 (1:1 Hexanes:EtOAc). Spectral data match those previously reported.<sup>28</sup>

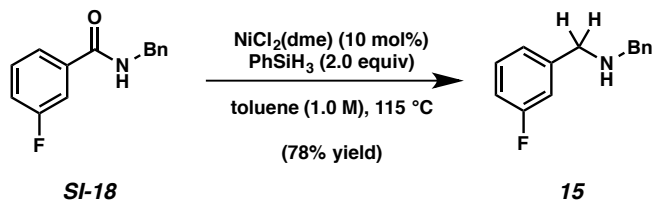

**Amine 15.** Purification by flash chromatography (1:1 Hexanes:EtOAc) yielded amine **15** (78% yield, average of two experiments) as a colorless oil. Amine **15**:  $R_f$  0.59 (1:1 Hexanes:EtOAc).  $^1\text{H}$  NMR (500 MHz,  $\text{CDCl}_3$ ):  $\delta$  7.35 (d,  $J = 4.4$ , 4H), 7.31–7.26 (m, 2H), 7.12–7.09 (m, 2H), 6.95 (td,  $J = 8.6$ , 2.3, 1H), 3.81 (s, 4H), 1.77 (br. s, 1H);  $^{13}\text{C}$  NMR (125 MHz,  $\text{CDCl}_3$ ):  $\delta$  164.0, 162.1, 143.0 (d,  $J_{\text{C-F}} = 6.9$ ), 140.1, 129.8 (d,  $J_{\text{C-F}} = 8.1$ ), 128.3 (d,  $J_{\text{C-F}} = 37.6$ ), 127.1, 123.6 (d,  $J_{\text{C-F}} = 2.9$ ), 114.9 ( $J_{\text{C-F}} = 21.1$ ), 113.8 ( $J_{\text{C-F}} = 21.1$ ), 53.1, 52.6; IR (film): 3064, 3028, 2831, 1615, 1588  $\text{cm}^{-1}$ ; HRMS-APCI ( $m/z$ ) [ $\text{M} + \text{H}$ ] $^+$  calcd for  $\text{C}_{14}\text{H}_{15}\text{FN}$ , 216.11830; found 216.11803.

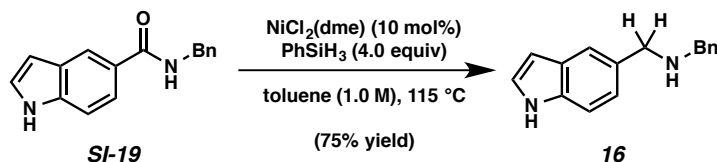

**Amine 16.** Purification by flash chromatography (4:1 Hexanes:EtOAc, 2%  $\text{Et}_3\text{N}$   $\rightarrow$  1:1 Hexanes:EtOAc, 2%  $\text{Et}_3\text{N}$ ) yielded amine **16** (75% yield, average of two experiments) as a colorless solid. Amine **16**: mp: 51–54  $^\circ\text{C}$ ;  $R_f$  0.36 (1:1 Hexanes:EtOAc, 2%  $\text{Et}_3\text{N}$ ).  $^1\text{H}$  NMR (500 MHz,  $\text{CDCl}_3$ ):  $\delta$  8.34 (br. s, 1H), 7.60 (s, 1H), 7.39–7.33 (m, 5H), 7.23–7.26 (m, 1H), 7.21–7.18 (m, 2H), 6.53 (d,  $J = 3.1$ , 1H), 3.93 (s, 2H), 3.85 (s, 2H), 2.44 (br. s, 1H);  $^{13}\text{C}$  NMR (125 MHz,  $\text{CDCl}_3$ ):  $\delta$  140.0, 135.3, 131.1, 128.5, 128.4, 128.1, 127.1, 124.7, 122.9, 120.5, 111.2, 102.5, 53.5, 52.9; IR (film): 3410, 3026, 2919, 1623, 1452  $\text{cm}^{-1}$ ; HRMS-APCI ( $m/z$ ) [ $\text{M} + \text{H}$ ] $^+$  calcd for  $\text{C}_{16}\text{H}_{17}\text{N}$ , 237.13863; found 237.13806.

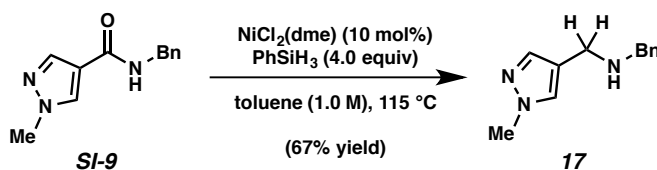

**Amine 17.** Purification by flash chromatography (EtOAc, 2%  $\text{Et}_3\text{N}$ ) yielded amine **17** (67% yield, average of two experiments) as a colorless oil. Amine **17**:  $R_f$  0.26 (EtOAc, 2%  $\text{Et}_3\text{N}$ ).  $^1\text{H}$  NMR (500 MHz,  $\text{CDCl}_3$ ):  $\delta$  7.43 (s, 1H), 7.35–7.32 (m, 4H), 7.31–7.30 (m, 1H), 7.28–7.24 (m, 2H), 3.87 (s, 3H), 3.81 (s, 2H), 3.69 (s, 2H);  $^{13}\text{C}$  NMR (125 MHz,  $\text{CDCl}_3$ ):  $\delta$  140.3, 138.9, 129.1,

128.6, 128.3, 127.1, 120.6, 53.3, 43.3, 39.0; IR (film): 3303, 2936, 2849, 1642, 1453  $\text{cm}^{-1}$ ; HRMS-APCI ( $m/z$ )  $[M + H]^+$  calcd for  $\text{C}_{12}\text{H}_{16}\text{N}_3$ , 202.13387; found 202.13355.

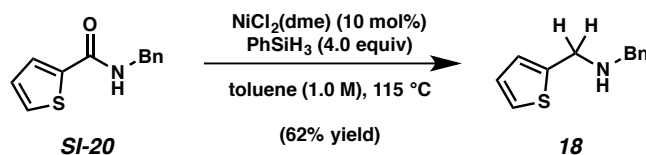

**Amine 18.** Purification by flash chromatography (10:1 Hexanes:EtOAc, 2%  $\text{Et}_3\text{N}$ ) yielded amine **18** (62% yield, average of two experiments) as a colorless oil. Amine **18**:  $R_f$  0.34 (4:1 Hexanes:EtOAc, 2%  $\text{Et}_3\text{N}$ ). Spectral data match those previously reported.<sup>26</sup>

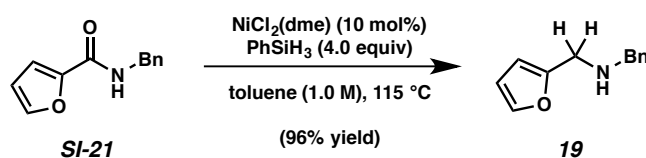

**Amine 19.** Purification by flash chromatography (4:1 Hexanes:EtOAc, 2%  $\text{Et}_3\text{N}$ ) yielded amine **19** (96% yield, average of two experiments) as a colorless oil. Amine **19**:  $R_f$  0.49 (4:1 Hexanes:EtOAc, 2%  $\text{Et}_3\text{N}$ ). Spectral data match those previously reported.<sup>25</sup>

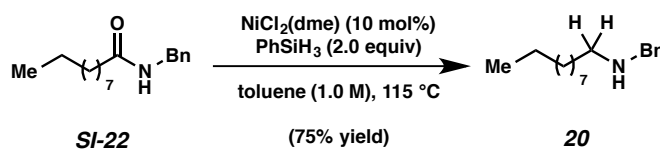

**Amine 20.** Purification by flash chromatography (10:1 Hexanes:EtOAc, 2%  $\text{Et}_3\text{N}$ ) yielded amine **20** (75% yield, average of two experiments) as a colorless oil. Amine **20**:  $R_f$  0.38 (10:1 Hexanes:EtOAc, 2%  $\text{Et}_3\text{N}$ ). Spectral data match those previously reported.<sup>29</sup>

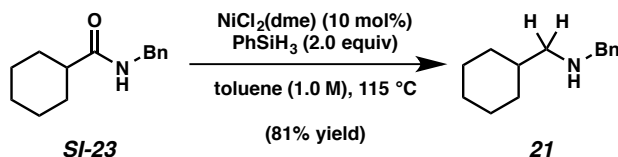

**Amine 21.** Purification by flash chromatography (10:1 Hexanes:EtOAc, 2%  $\text{Et}_3\text{N}$ ) yielded amine **21** (81% yield, average of two experiments) as a colorless oil. Amine **21**:  $R_f$  0.40 (10:1 Hexanes:EtOAc, 2%  $\text{Et}_3\text{N}$ ). Spectral data match those previously reported.<sup>30</sup>

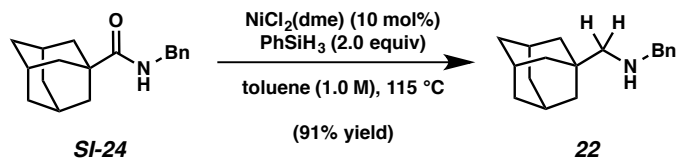

**Amine 22.** Purification by flash chromatography (4:1 Hexanes:EtOAc, 2% Et<sub>3</sub>N) yielded amine **22** (91% yield, average of two experiments) as a colorless oil. Amine **22**: *R<sub>f</sub>* 0.52 (4:1 Hexanes:EtOAc, 2% Et<sub>3</sub>N). Spectral data match those previously reported.<sup>31</sup>

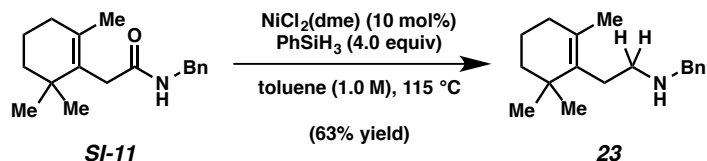

**Amine 23.** Purification by preparative thin-layer chromatography (10:1 Hexanes:EtOAc, 2% Et<sub>3</sub>N) yielded amine **23** (63% yield, average of two experiments) as a colorless oil. Amine **23**: *R<sub>f</sub>* 0.40 (10:1 Hexanes:EtOAc, 2% Et<sub>3</sub>N). <sup>1</sup>H NMR (500 MHz, CDCl<sub>3</sub>): δ 7.32–7.30 (m, 4H), 7.27–7.21 (m, 1H), 3.82 (s, 2H), 2.67–2.63 (m, 2H), 2.23 (t, *J* = 8.5, 2H), 1.89 (t, *J* = 6.4, 2H), 1.59 (s, 3H), 1.57–1.53 (m, 2H), 1.41–1.39 (m, 2H), 0.97 (s, 6H); <sup>13</sup>C NMR (125 MHz, CDCl<sub>3</sub>): δ 140.7, 134.9, 128.5, 128.4, 128.1, 127.0, 54.1, 49.7, 39.9, 34.9, 32.9, 29.8, 28.9, 20.1, 19.6; IR (film): 3026, 2926, 2864, 1873, 1452 cm<sup>-1</sup>; HRMS-APCI (*m/z*) [*M* + *H*]<sup>+</sup> calcd for C<sub>18</sub>H<sub>28</sub>N, 258.22074; found 258.22163.

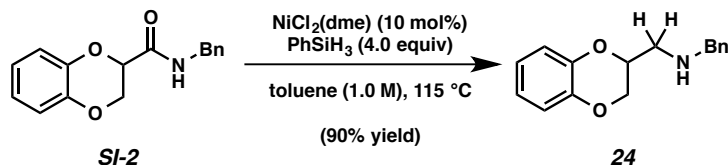

**Amine 24.** Purification by flash chromatography (10:1 Hexanes:EtOAc, 2% Et<sub>3</sub>N) → 4:1 Hexanes:EtOAc, 2% Et<sub>3</sub>N) yielded amine **24** (90% yield, average of two experiments) as a colorless oil. Amine **24**: *R<sub>f</sub>* 0.38 (4:1 Hexanes:EtOAc, 2% Et<sub>3</sub>N). <sup>1</sup>H NMR (500 MHz, CDCl<sub>3</sub>): δ 7.36–7.35 (m, 4H), 7.30–7.27 (m, 1H), 6.90–6.84 (m, 4H), 4.33–4.30 (m, 1H), 4.28 (dd, *J* = 11.0, 2.4, 1H), 4.05 (dd, *J* = 11.0, 7.3, 1H), 3.87 (s, 2H), 2.94 (dd, *J* = 12.4, 6.6, 1H), 2.88 (dd, *J* = 12.4, 4.6, 1H), 2.00 (br. s, 1H); <sup>13</sup>C NMR (125 MHz, CDCl<sub>3</sub>): δ 143.4, 143.3, 139.9, 128.6, 128.2, 127.2, 121.6, 121.5, 117.4, 117.2, 72.7, 66.7, 54.0, 49.3; IR (film): 3027, 2919, 2831, 1592, 1492 cm<sup>-1</sup>; HRMS-APCI (*m/z*) [*M* + *H*]<sup>+</sup> calcd for C<sub>16</sub>H<sub>18</sub>NO<sub>2</sub>, 256.13321; found 256.13258.

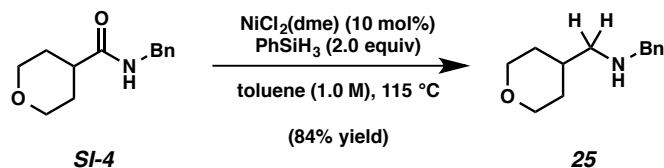

**Amine 25.** Purification by flash chromatography (1:1 Hexanes:EtOAc, 2% Et<sub>3</sub>N) yielded amine **25** (84% yield, average of two experiments) as a colorless oil. Amine **25**: *R<sub>f</sub>* 0.54 (1:1 Hexanes:EtOAc, 2% Et<sub>3</sub>N). <sup>1</sup>H NMR (500 MHz, CDCl<sub>3</sub>): δ 7.43–7.31 (m, 4H), 7.27–7.24 (m, 1H), 3.97–3.94 (m, 2H), 3.78 (s, 2H), 3.37 (ddd, *J* = 11.8, 11.8, 1.9, 2H), 2.52 (d, *J* = 6.6, 2H), 1.79 (br. s, 1H), 1.72 (ttt, *J* = 11.8, 6.9, 3.8, 1H), 1.65 (m, 2H), 1.29 (dddd, *J* = 11.8, 11.8, 11.8, 4.4, 2H); <sup>13</sup>C NMR (125 MHz, CDCl<sub>3</sub>): δ 140.6, 128.5, 128.1, 127.0, 67.9, 55.6, 54.2, 35.6, 31.4; IR (film): 3026, 2916, 2838, 1603, 1453 cm<sup>-1</sup>; HRMS-APCI (*m/z*) [*M* + *H*]<sup>+</sup> calcd for C<sub>13</sub>H<sub>20</sub>NO, 206.15394; found 206.15352.

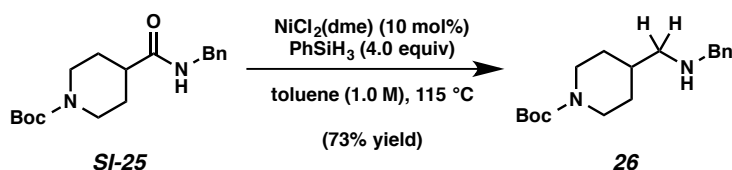

**Amine 26.** Purification by flash chromatography (4:1 Hexanes:EtOAc, 2% Et<sub>3</sub>N) yielded amine **26** (73% yield, average of two experiments) as an amorphous solid. Amine **26**: *R<sub>f</sub>* 0.52 (4:1 Hexanes:EtOAc, 2% Et<sub>3</sub>N). <sup>1</sup>H NMR (500 MHz, CDCl<sub>3</sub>, 60 °C): δ 7.32–7.27 (m, 4H), 7.22–7.18 (m, 1H), 4.03 (d, *J* = 12.7, 2H), 3.75 (s, 2H), 2.67 (t, *J* = 12.5, 2H), 2.49 (br. s, 2H), 1.67 (d, *J* = 12.4, 2H), 1.61–1.55 (m, 2H), 1.42 (s, 9H), 1.13–1.06 (m, 2H); <sup>13</sup>C NMR (125 MHz, CDCl<sub>3</sub>, 60 °C): δ 154.7, 140.5, 128.2, 127.8, 126.7, 78.9, 54.9, 54.0, 43.8, 36.6, 30.3, 28.3; IR (film): 2975, 2921, 2849, 1685, 1452 cm<sup>-1</sup>; HRMS-APCI (*m/z*) [*M* + *H*]<sup>+</sup> calcd for C<sub>18</sub>H<sub>29</sub>N<sub>2</sub>O<sub>2</sub>, 305.22235; found 305.22153.

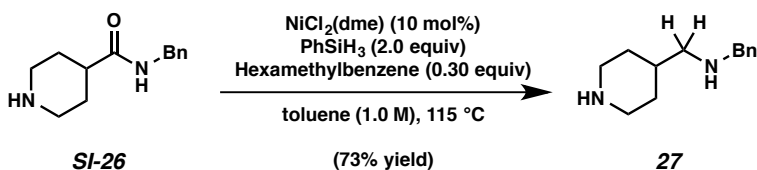

**Amine 27.** <sup>1</sup>H NMR analysis of the crude reaction mixture indicated a 73% yield (average of two experiments) of amine **27** relative to hexamethylbenzene internal standard. Amine **27**: *R<sub>f</sub>* 0.11 (CH<sub>2</sub>Cl<sub>2</sub>, 2% MeOH). <sup>1</sup>H NMR (500 MHz, CDCl<sub>3</sub>): δ 7.33–7.29 (m, 4H), 7.25–7.22 (m, 1H), 3.77 (s, 2H), 3.05 (ddd, *J* = 12.1, 2.7, 2.7, 2H), 2.58 (ddd, *J* = 12.1, 12.1, 2.4, 2H), 2.49 (d, *J* =

6.7, 2H), 1.77 (br. s, 1H), 1.72–1.69 (m, 2H), 1.59 (ttt,  $J = 12.1, 6.8, 2.5$ , 1H), 1.11 (dddd,  $J = 12.1, 12.1, 12.1, 3.9$ , 2H);  $^{13}\text{C}$  NMR (125 MHz,  $\text{CDCl}_3$ ):  $\delta$  140.6, 128.5, 128.2, 126.9, 55.9, 54.3, 46.6, 36.8, 31.9; IR (film): 3308, 3026, 2921, 1633, 1542  $\text{cm}^{-1}$ ; HRMS-APCI ( $m/z$ ) [ $\text{M} + \text{H}$ ] $^+$  calcd for  $\text{C}_{13}\text{H}_{21}\text{N}_2$ , 205.16993; found 205.16948.

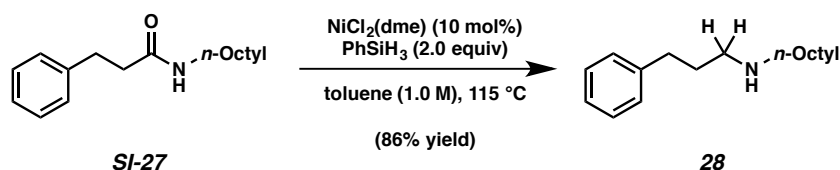

**Amine 28.** Purification by preparative thin-layer chromatography (EtOAc, 2%  $\text{Et}_3\text{N}$ ) yielded amine **28** (86% yield, average of two experiments) as a colorless oil. Amine **28**:  $R_f$  0.25 (EtOAc, 2%  $\text{Et}_3\text{N}$ ). Spectral data match those previously reported.<sup>32</sup>

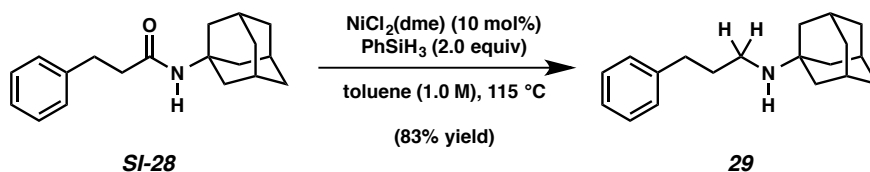

**Amine 29.** Purification by preparative thin-layer chromatography (1:1 Hexanes:EtOAc, 2%  $\text{Et}_3\text{N}$ ) yielded amine **29** (83% yield, average of two experiments) as a colorless oil. Amine **29**:  $R_f$  0.34 (1:1 Hexanes:EtOAc, 2%  $\text{Et}_3\text{N}$ ). Spectral data match those previously reported.<sup>32</sup>

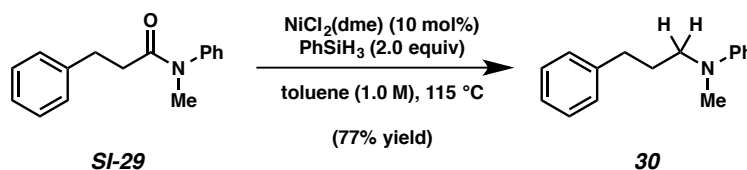

**Amine 30.** Purification by flash chromatography (20:1 Hexanes:EtOAc, 2%  $\text{Et}_3\text{N}$ ) yielded amine **30** (77% yield, average of two experiments) as a colorless oil. Amine **30**:  $R_f$  0.57 (10:1 Hexanes:EtOAc, 2%  $\text{Et}_3\text{N}$ ). Spectral data match those previously reported.<sup>33</sup>

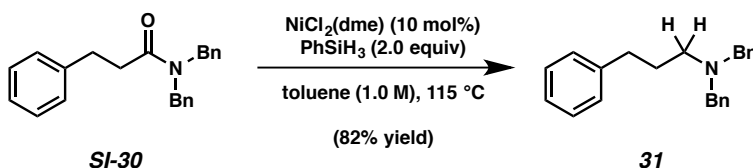

**Amine 31.** Purification by flash chromatography (20:1 Hexanes:EtOAc, 2%  $\text{Et}_3\text{N}$ ) yielded amine **31** (82% yield, average of two experiments) as a colorless oil. Amine **31**:  $R_f$  0.63 (10:1 Hexanes:EtOAc, 2%  $\text{Et}_3\text{N}$ ). Spectral data match those previously reported.<sup>34</sup>

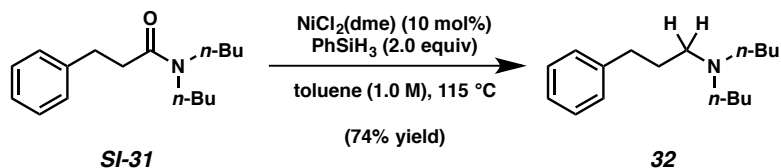

**Amine 32.** Purification by flash chromatography (7:3 Hexanes:EtOAc, 2% Et<sub>3</sub>N) followed by preparative thin-layer chromatography (7:3 Hexanes:EtOAc, 2% Et<sub>3</sub>N) yielded amine **32** (74% yield, average of two experiments) as a colorless oil. Amine **32**: *R<sub>f</sub>* 0.35 (7:3 Hexanes:EtOAc, 2% Et<sub>3</sub>N). Spectral data match those previously reported.<sup>35</sup>

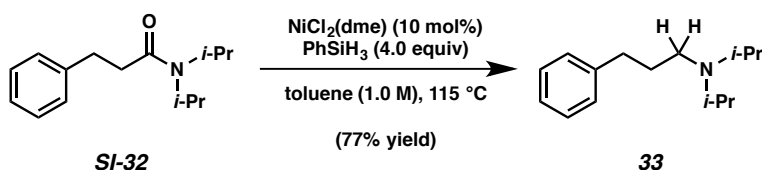

**Amine 33.** <sup>1</sup>H NMR analysis of the crude reaction mixture indicated a 77% yield (average of two experiments) of amine **33** relative to hexamethylbenzene internal standard. Amine **33**: *R<sub>f</sub>* 0.23 (3:1 Hexanes:EtOAc, 2% Et<sub>3</sub>N). Spectral data match those previously reported.<sup>35</sup>

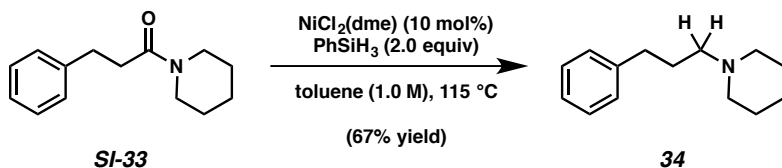

**Amine 34.** Purification by preparative thin-layer chromatography (1:4 Hexanes:EtOAc, 2% Et<sub>3</sub>N) yielded amine **34** (67% yield, average of two experiments) as a colorless oil. Amine **34**: *R<sub>f</sub>* 0.23 (1:4 Hexanes:EtOAc, 2% Et<sub>3</sub>N). Spectral data match those previously reported.<sup>36</sup>

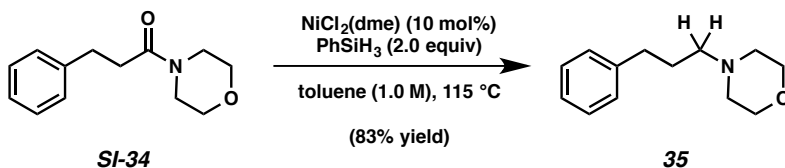

**Amine 35.** Purification by preparative thin-layer chromatography (1:4 Hexanes:EtOAc, 2% Et<sub>3</sub>N) yielded amine **35** (83% yield, average of two experiments) as a colorless oil. Amine **35**: *R<sub>f</sub>* 0.26 (1:4 Hexanes:EtOAc, 2% Et<sub>3</sub>N). Spectral data match those previously reported.<sup>37</sup>



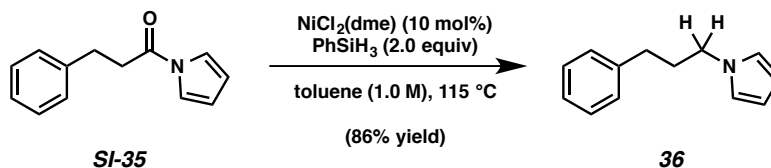

**Amine 36.** Purification by flash chromatography (9:1 Hexanes:EtOAc) yielded amine **36** (86% yield, average of two experiments) as a colorless oil. Amine **36**:  $R_f$  0.55 (4:1 Hexanes:EtOAc). Spectral data match those previously reported.<sup>38</sup>

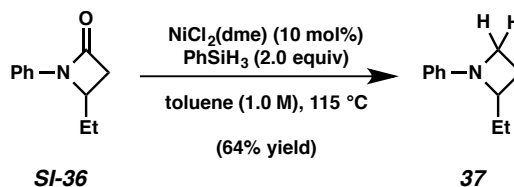

**Amine 37.** Purification by flash chromatography (39:1 Pentane:Et<sub>2</sub>O) yielded amine **37** (64% yield, average of two experiments) as a colorless oil. Amine **37**:  $R_f$  0.23 (39:1 Pentane:Et<sub>2</sub>O). Spectral data match those previously reported.<sup>20</sup>

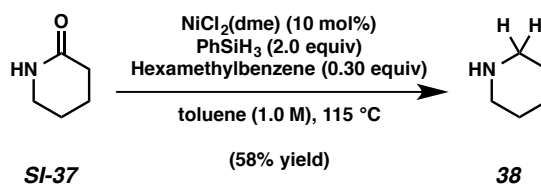

**Amine 38.** <sup>1</sup>H NMR analysis of the crude reaction mixture indicated a 58% yield (average of two experiments) of amine **38** relative to hexamethylbenzene internal standard. Spectral data match those previously reported.<sup>39</sup>

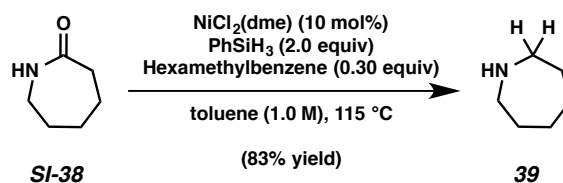

**Amine 39.** <sup>1</sup>H NMR analysis of the crude reaction mixture indicated an 83% yield (average of two experiments) of amine **39** relative to hexamethylbenzene internal standard. Spectral data match those previously reported.<sup>39</sup>

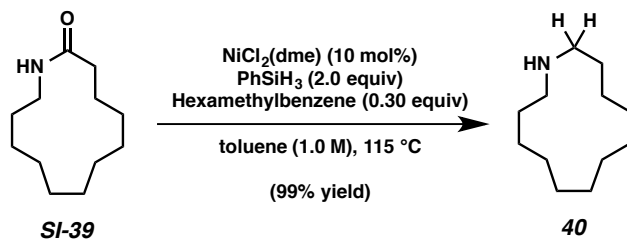

**Amine 40.**  $^1\text{H}$  NMR analysis of the crude reaction mixture indicated a 99% yield (average of two experiments) of amine **40** relative to hexamethylbenzene internal standard. Amine **40**:  $R_f$  0.39 (Hexanes). Spectral data match those previously reported.<sup>40</sup>

### E. Synthesis of $\text{PhSiD}_3$

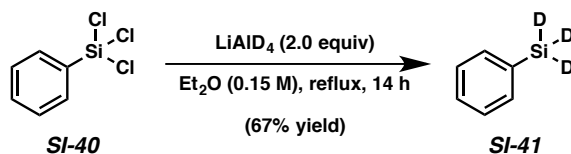

A round bottom flask equipped with a reflux condenser and a magnetic stir bar was flame-dried under reduced pressure, and then cooled under a  $\text{N}_2$  atmosphere.  $\text{LiAlD}_4$  (1.14 g, 27.21 mmol, 2 equiv) was added, and the flask was flushed with  $\text{N}_2$  for 10 min. After cooling to 0 °C,  $\text{Et}_2\text{O}$  (90 mL) was added, followed by  $\text{PhSiCl}_3$  (**SI-40**) (2.18 mL, 13.61 mmol, 1 equiv) dropwise over 2 min. The resulting grey suspension was refluxed for 14 h. After cooling to room temperature, the resulting suspension was filtered through celite and cooled to 0 °C. The filtrate was then quenched by the dropwise addition of chilled  $\text{H}_2\text{O}$  (50 mL, 0 °C) with vigorous stirring. The reaction mixture was transferred to a separatory funnel and the aqueous layer was extracted with  $\text{Et}_2\text{O}$  (2 x 30 mL). The organic layers were combined, dried over  $\text{MgSO}_4$ , and filtered. Using a rotary evaporator, with a bath cooled to 0 °C, the solution was evaporated at 220 mbar for 2 h until minimal solvent remained.  $\text{MgSO}_4$  was added and the mixture was filtered through cotton. Using a rotary evaporator, with a bath cooled to 0 °C, the solution was evaporated at 130 mbar for 1 h, and then warmed to 23 °C and evaporated at 20 mbar for 10 min. Desired compound **SI-41** (1.02 g, 67% yield) was obtained as a colorless oil. Spectral data match those previously reported.<sup>41</sup>

### F. Reduction of Amino Acid Derivatives using PhSiD<sub>3</sub>

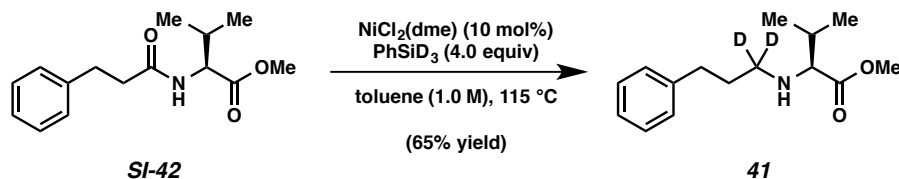

#### Representative Procedure (reduction of amide SI-42 is used as an example). Amine 41.

A 1-dram vial was charged with a magnetic stir bar, flame-dried under reduced pressure, and allowed to cool under a N<sub>2</sub> atmosphere. Amide substrate **SI-42** (26.3 mg, 0.100 mmol, 1.0 equiv) and NiCl<sub>2</sub>(dme) (2.2 mg, 0.0100 mmol, 10 mol%) were added, and the vial was flushed with N<sub>2</sub> for 5 min. PhSiD<sub>3</sub> (49.4 μL, 0.4000 mmol, 4.0 equiv) was added under a N<sub>2</sub> atmosphere via syringe followed by toluene (100 μL, 1.0 M). The vial was then capped with a Teflon-lined screw cap under a flow of N<sub>2</sub>. The reaction mixture was then placed in a pre-heated aluminum block and allowed to stir at 115 °C for 24 h. After cooling to room temperature, the reaction mixture was transferred to a separatory funnel with EtOAc (3 mL) and basified with 1.0 M aqueous NaOH (4 mL). The layers were separated and the aqueous layer was extracted with EtOAc (3 x 5mL). The combined organic layers were washed with saturated aqueous NaCl (5 mL). The volatiles were removed under reduced pressure, and the crude residue was purified by preparative thin-layer chromatography (4:1 Hexanes:EtOAc) to yield amine **41** (65% yield, average of two experiments) as a colorless oil. Amine **41**: R<sub>f</sub> 0.52 (4:1 Hexanes:EtOAc). <sup>1</sup>H NMR (500 MHz, CDCl<sub>3</sub>): δ 7.28–7.26 (m, 2H), 7.18–7.16 (m, 3H), 3.71 (s, 3H), 2.97 (d, *J* = 6.2, 1H), 2.70–2.59 (m, 2H), 1.88 (dsept, *J* = 6.8, 6.8, 1H), 1.81–1.71 (m, 2H), 0.95 (d, *J* = 6.8, 3H), 0.93 (d, *J* = 6.8, 3H); <sup>2</sup>H NMR (76 MHz, CDCl<sub>3</sub>): δ 2.6, 2.4; <sup>13</sup>C NMR (125 MHz, CDCl<sub>3</sub>): δ 176.0, 142.4, 128.6, 128.4, 125.8, 67.5, 51.5, 47.42 (m), 33.5, 31.8, 31.7, 19.4, 18.9; IR (film): 3336, 3026, 2927, 1732, 1453 cm<sup>-1</sup>; HRMS-APCI (*m/z*) [M + H]<sup>+</sup> calcd for C<sub>15</sub>H<sub>22</sub>D<sub>2</sub>NO<sub>2</sub>, 252.19235; found 252.19381; [α]<sub>D</sub><sup>30.4</sup> -7.33° (c = 0.10, CH<sub>2</sub>Cl<sub>2</sub>).

*Any modifications of the conditions shown in the representative procedure above are specified in the following schemes, which depict all of the results shown in Figure 5.*

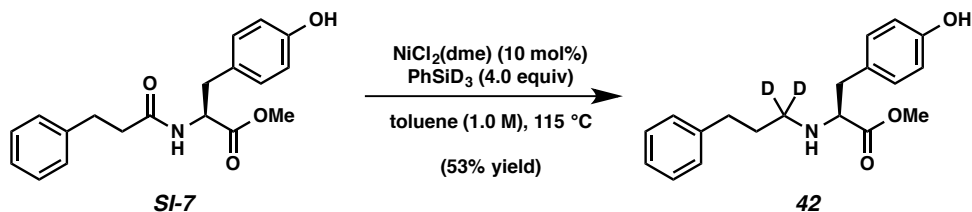

**Amine 42.** Purification by preparative thin-layer chromatography (1:1 Hexanes:EtOAc) yielded amine **42** (53% yield, average of two experiments) as a colorless oil. Amine **42**:  $R_f$  0.39 (1:1 Hexanes:EtOAc).  $^1\text{H}$  NMR (500 MHz,  $\text{CD}_2\text{Cl}_2$ ):  $\delta$  7.25 (t,  $J = 7.4$ , 2H), 7.17–7.12 (m, 3H), 7.02 (d,  $J = 8.4$ , 2H), 6.72 (d,  $J = 8.4$ , 2H), 3.62 (s, 3H), 3.44 (t,  $J = 6.6$ , 1H), 2.89–2.82 (m, 2H), 2.60–2.57 (m, 2H), 1.77–1.67 (m, 2H);  $^2\text{H}$  NMR (76 MHz,  $\text{CD}_2\text{Cl}_2$ ):  $\delta$  2.59, 2.45;  $^{13}\text{C}$  NMR (125 MHz,  $\text{CD}_2\text{Cl}_2$ ): (14 of 15 signals observed)  $\delta$  175.2, 155.0, 142.6, 130.8, 129.8, 128.8, 128.6, 126.1, 115.5, 63.4, 51.9, 38.9, 35.6, 31.8; IR (film): 3291, 3025, 2927, 1734, 1515  $\text{cm}^{-1}$ ; HRMS-APCI ( $m/z$ )  $[\text{M} + \text{H}]^+$  calcd for  $\text{C}_{19}\text{H}_{22}\text{D}_2\text{NO}_3$ , 316.18762; found 316.18708;  $[\alpha]^{29.7}_{\text{D}} +5.33^\circ$  ( $c = 0.10$ ,  $\text{CH}_2\text{Cl}_2$ ).

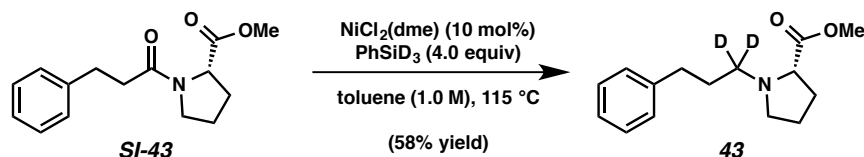

**Amine 43.** Purification by preparative thin-layer chromatography (1:1 Hexanes:EtOAc) yielded amine **43** (58% yield, average of two experiments) as a colorless oil. Amine **43**:  $R_f$  0.52 (1:1 Hexanes:EtOAc).  $^1\text{H}$  NMR (500 MHz,  $\text{CD}_2\text{Cl}_2$ ):  $\delta$  7.27–7.25 (m, 2H), 7.20–7.14 (m, 3H), 3.65 (s, 3H), 3.16–3.09 (m, 2H), 2.68–2.57 (m, 2H), 2.37–2.32 (m, 1H), 2.10–2.01 (m, 1H), 1.91–1.84 (m, 2H), 1.82–1.74 (m, 3H);  $^2\text{H}$  NMR (76 MHz,  $\text{CDCl}_3$ ):  $\delta$  2.68, 2.39;  $^{13}\text{C}$  NMR (125 MHz,  $\text{CDCl}_3$ ):  $\delta$  174.9, 142.2, 128.5, 128.4, 125.9, 66.2, 54.0 (m), 53.6, 52.0, 33.8, 30.1, 29.5, 23.3; IR (film): 3059, 2947, 2860, 1731, 1453  $\text{cm}^{-1}$ ; HRMS-APCI ( $m/z$ )  $[\text{M} + \text{H}]^+$  calcd for  $\text{C}_{15}\text{H}_{20}\text{D}_2\text{NO}_2$ , 250.17587; found 250.17816;  $[\alpha]^{30.8}_{\text{D}} -57.33^\circ$  ( $c = 0.10$ ,  $\text{CH}_2\text{Cl}_2$ ).

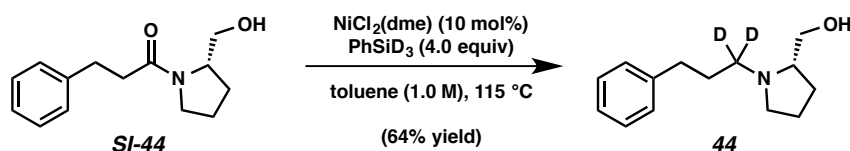

**Amine 44.** Purification by preparative thin-layer chromatography (EtOAc, 2%  $\text{Et}_3\text{N}$ ) yielded amine **44** (64% yield, average of two experiments) as a colorless oil. Amine **44**:  $R_f$  0.45 (EtOAc, 2%  $\text{Et}_3\text{N}$ ).  $^1\text{H}$  NMR (500 MHz,  $\text{CDCl}_3$ ):  $\delta$  7.29–7.26 (m, 2H), 7.19–7.17 (m, 3H), 3.59 (dd,  $J =$

10.6, 3.9, 1H), 3.37 (dd,  $J = 10.6, 2.2$ , 1H), 3.20–3.16 (m, 1H), 2.73–2.67 (m, 1H), 2.61–2.54 (m, 2H), 2.27–2.21 (m, 1H), 1.90–1.69 (m, 6H);  $^2\text{H}$  NMR (76 MHz,  $\text{CDCl}_3$ ):  $\delta$  2.73, 2.29;  $^{13}\text{C}$  NMR (125 MHz,  $\text{CDCl}_3$ ):  $\delta$  142.3, 128.5, 128.4, 125.9, 64.9, 61.9, 54.2, 53.5 (m), 33.7, 30.5, 27.8, 23.8; IR (film): 3362, 3084, 2936, 2800, 1602  $\text{cm}^{-1}$ ; HRMS-APCI ( $m/z$ )  $[\text{M} + \text{H}]^+$  calcd for  $\text{C}_{14}\text{H}_{20}\text{D}_2\text{NO}$ , 222.18170; found 222.18214;  $[\alpha]^{31.0}_{\text{D}} -44.66^\circ$  ( $c = 0.10$ ,  $\text{CH}_2\text{Cl}_2$ ).

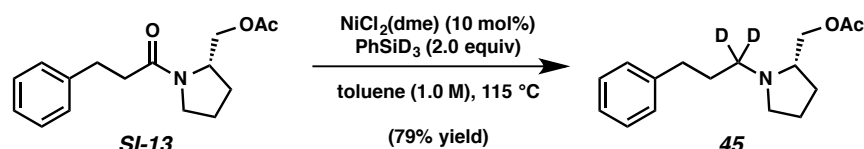

**Amine 45.** Purification by preparative thin-layer chromatography (1:1 Hexanes:EtOAc, 2%  $\text{Et}_3\text{N}$ ) yielded amine **45** (79% yield, average of two experiments) as a colorless oil. Amine **45**:  $R_f$  0.35 (1:1 Hexanes:EtOAc, 2%  $\text{Et}_3\text{N}$ ).  $^1\text{H}$  NMR (500 MHz,  $\text{CDCl}_3$ ):  $\delta$  7.28–7.26 (m, 2H), 7.19–7.16 (m, 3H), 4.04 (dd,  $J = 10.9, 5.1$ , 1H), 3.92 (dd,  $J = 10.9, 6.1$ , 1H), 3.15–3.12 (m, 1H), 2.70–2.57 (m, 3H), 2.23–2.18 (m, 1H), 2.01 (s, 3H), 1.92–1.86 (m, 1H), 1.85–1.79 (m, 2H), 1.78–1.71 (m, 2H), 1.62–1.56 (m, 1H);  $^2\text{H}$  NMR (76 MHz,  $\text{CDCl}_3$ ):  $\delta$  2.79, 2.33;  $^{13}\text{C}$  NMR (125 MHz,  $\text{CDCl}_3$ ):  $\delta$  171.3, 142.4, 128.5, 128.4, 125.8, 67.4, 62.4, 54.8 (m), 54.4, 33.8, 30.3, 28.4, 23.2, 21.1; IR (film): 3062, 2940, 2785, 1738, 1603  $\text{cm}^{-1}$ ; HRMS-APCI ( $m/z$ )  $[\text{M} + \text{H}]^+$  calcd for  $\text{C}_{16}\text{H}_{22}\text{D}_2\text{NO}_2$ , 264.19221; found 264.19271;  $[\alpha]^{29.9}_{\text{D}} -54.66^\circ$  ( $c = 0.10$ ,  $\text{CH}_2\text{Cl}_2$ ).

### G. Verification of Enantiopurity – Racemic Compound Synthesis

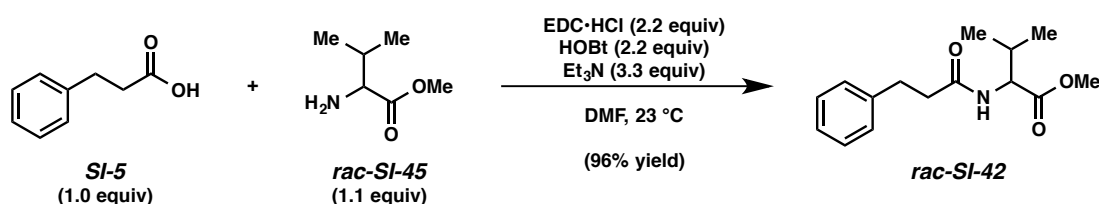

**Representative Procedure for the synthesis of racemic amide substrates (synthesis of amide rac-SI-42 is used as an example).** Amide **rac-SI-42**. To a solution of carboxylic acid **SI-5** (300.0 mg, 1.99 mmol, 1.0 equiv), HOBT (594.0 mg, 4.39 mmol, 2.2 equiv), and EDC·HCl (848.0 mg, 4.39 mmol, 2.2 equiv) in DMF (10.0 mL, 0.2 M) at 23 °C was added amine **rac-SI-45** (376.0 mg, 2.19 mmol, 1.1 equiv) followed by triethylamine (0.92 mL, 6.59 mmol, 1.1 equiv) under a  $\text{N}_2$  atmosphere. The reaction mixture stirred at 23 °C for 18 h. The reaction was diluted with deionized water (50 mL) and transferred to a separatory funnel with EtOAc (40 mL). The layers were separated and the aqueous layer was extracted with EtOAc (3 x 40 mL). The organic

layers were combined and washed with water (3 x 40 mL), dried over Na<sub>2</sub>SO<sub>4</sub>, and the volatiles were removed under reduced pressure. The resulting crude residue was purified by flash chromatography (3:1 Hexanes:EtOAc) to yield amide **rac-SI-42** (506.0 mg, 96% yield) as an off-white solid.

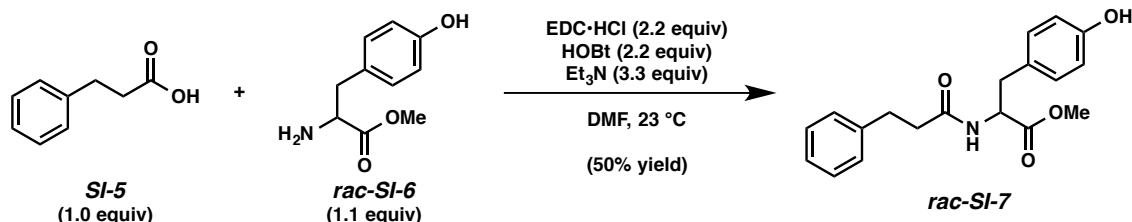

**Amide rac-SI-7.** Following representative procedure. Purification by flash chromatography (3:1 Hexanes:EtOAc → 1:1 Hexanes:EtOAc) to yield amide **rac-SI-7** (269.3 mg, 50% yield) as a white solid.

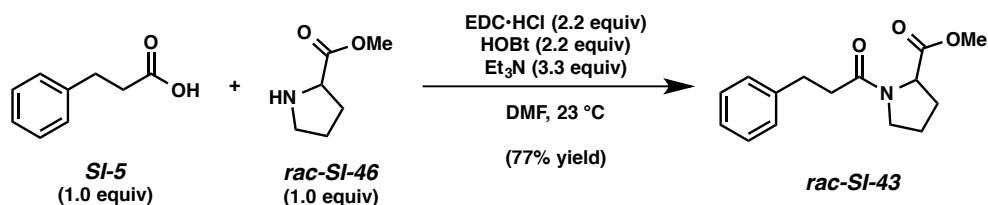

**Amide rac-SI-43.** Following representative procedure. Purification by flash chromatography (1:1 Hexanes:EtOAc → 1:3 Hexanes:EtOAc) to yield amide **rac-SI-43** (221.1 mg, 77% yield) as a colorless oil.

### Synthesis of racemic proline-derived amide substrates

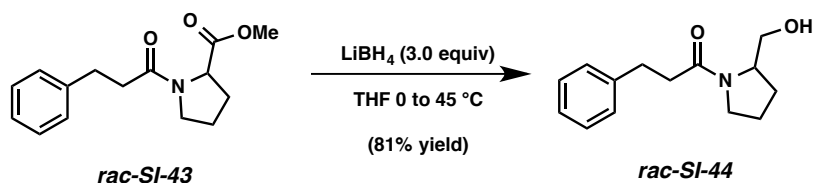

**Amide rac-SI-44.** To a solution of amide **rac-SI-43** (100.0 mg, 0.383 mmol, 1 equiv) in THF (8.0 mL, 0.05 M) at 0 °C under a N<sub>2</sub> atmosphere, was added LiBH<sub>4</sub> (25.0 mg, 1.15 mmol, 3 equiv) in one portion. The vial was then capped with a Teflon-lined screw cap under a flow of N<sub>2</sub> and placed in a pre-heated aluminum block and allowed to stir at 45 °C for 15 h. After cooling to room temperature, deionized H<sub>2</sub>O was added (2 mL) and the reaction mixture was transferred to a separatory funnel with CH<sub>2</sub>Cl<sub>2</sub> (3 mL) and extracted with CH<sub>2</sub>Cl<sub>2</sub> (3 x 3mL). The combined

organic layers were washed with saturated aqueous NaCl (5 mL). The volatiles were removed under reduced pressure, and the resulting crude residue was purified by flash chromatography (1:3 Hexanes:EtOAc  $\rightarrow$  EtOAc) to yield amide **rac-SI-44** (72.0 mg, 81% yield) as a colorless oil.

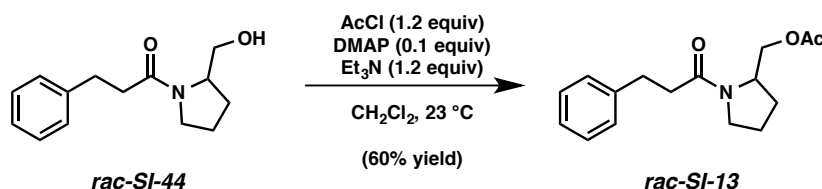

**Amide rac-SI-13.** A 1-dram vial was charged with a magnetic stir bar, flame-dried under reduced pressure, and allowed to cool under a N<sub>2</sub> atmosphere. Amide substrate **rac-SI-44** (25.6 mg, 0.110 mmol, 1 equiv) and DMAP (1.3 mg, 0.010 mmol, 0.1 equiv) were added and the vial flushed with N<sub>2</sub> for 5 min. CH<sub>2</sub>Cl<sub>2</sub> (2.0 mL, 0.05 M), AcCl (9.4  $\mu$ L, 0.132 mmol, 1.2 equiv), and Et<sub>3</sub>N (18.3  $\mu$ L, 0.132 mmol, 1.2 equiv) were added under a N<sub>2</sub> atmosphere and the reaction was left to stir for 3 h at 23 °C. NH<sub>4</sub>Cl (2 mL) was added and the reaction mixture was transferred to separatory funnel with CH<sub>2</sub>Cl<sub>2</sub> (3 mL). The layers were separated and the aqueous layer was extracted with CH<sub>2</sub>Cl<sub>2</sub> (3 x 3 mL). The combined organic layers were washed with saturated aqueous NaCl (5 mL). The volatiles were removed under reduced pressure, and the resulting crude residue was purified by preparative thin-layer chromatography (1:3 Hexanes:EtOAc  $\rightarrow$  EtOAc) to yield amide **rac-SI-13** (16.0 mg, 60% yield) as a colorless oil.

### Representative Procedure for the deuterium reduction of racemic amino acid derivatives

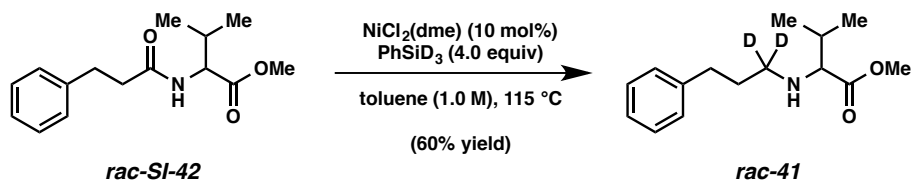

**Representative Procedure (reduction of amide rac-SI-42 is used as an example). Amine rac-41.** A 1-dram vial was charged with a magnetic stir bar, flame-dried under reduced pressure, and allowed to cool under a N<sub>2</sub> atmosphere. Amide substrate **rac-SI-42** (26.3 mg, 0.100 mmol, 1.0 equiv) and NiCl<sub>2</sub>(dme) (2.2 mg, 0.0100 mmol, 10 mol%) was added, and the vial was flushed with N<sub>2</sub>. PhSiD<sub>3</sub> (49.4  $\mu$ L, 0.4000 mmol, 4.0 equiv) was added under a N<sub>2</sub> atmosphere via syringe followed by toluene (100  $\mu$ L, 1.0 M). The vial was then capped with a Teflon-lined screw cap under a flow of N<sub>2</sub>. The reaction mixture was then placed in a pre-heated aluminum block and

allowed to stir at 115 °C for 24 h. After cooling to room temperature, the reaction mixture was transferred to a separatory funnel with EtOAc (3 mL) and basified with 1.0 M aqueous NaOH (4 mL). The layers were separated and the aqueous layer was extracted with EtOAc (3 x 5mL). The combined organics were washed with saturated aqueous NaCl (5 mL). The volatiles were removed under reduced pressure, and the crude residue was purified by preparative thin-layer chromatography (4:1 Hexanes:EtOAc) to yield amine **rac-41** (15.0 mg, 60% yield) as a colorless oil.

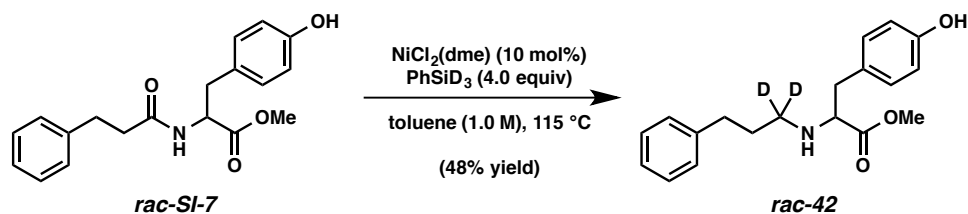

**Amine rac-42.** Purification by preparative thin-layer chromatography (1:1 Hexanes:EtOAc) yielded amine **rac-42** (15.0 mg, 48% yield) as a colorless oil.

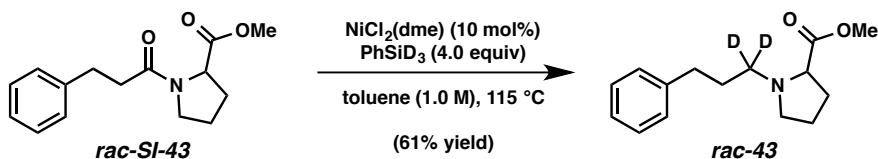

**Amine rac-43.** Purification by preparative thin-layer chromatography (1:1 Hexanes:EtOAc) yielded amine **rac-43** (15.2 mg, 61% yield) as a colorless oil.

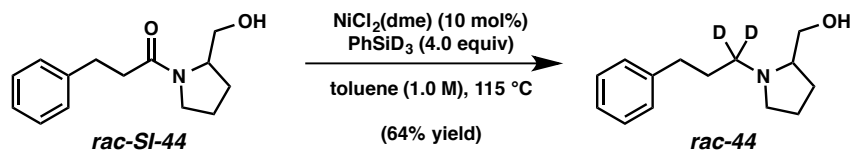

**Amine rac-44.** Purification by preparative thin-layer chromatography (EtOAc, 2% Et<sub>3</sub>N) yielded amine **rac-44** (14.1 mg, 64% yield) as a colorless oil.

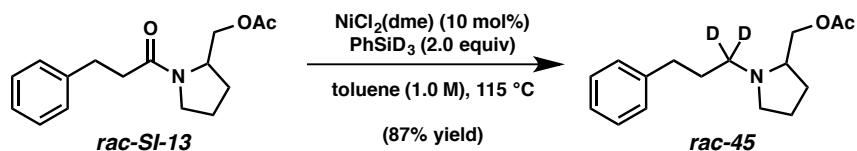

**Amine rac-45.** Purification by preparative thin-layer chromatography (1:1 Hexanes:EtOAc, 2% Et<sub>3</sub>N) yielded amine **rac-45** (22.2 mg, 87% yield) as a colorless oil.



## H. Verification of Enantiopurity – er and dr determination

The enantiomeric ratio of **41** was determined by chiral SFC analysis.

| Compound                                                                                               | Method Column /Temp          | Polar Cosolvent | Method Flow Rate | Retention Times                    | Enantiomeric Ratio (er) |
|--------------------------------------------------------------------------------------------------------|------------------------------|-----------------|------------------|------------------------------------|-------------------------|
| 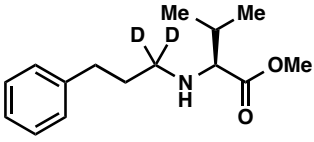 <p><b>41</b></p>     | Daicel ChiralPak OB-H /35 °C | 1% iPrOH        | 0.60 mL/min      | 16.36/21.20 min                    | 0:100                   |
|  <p><b>rac-41</b></p> | Daicel ChiralPak OB-H /35 °C | 1% iPrOH        | 0.60 mL/min      | 14.34/17.31 min<br>17.42/21.53 min | 51:49                   |

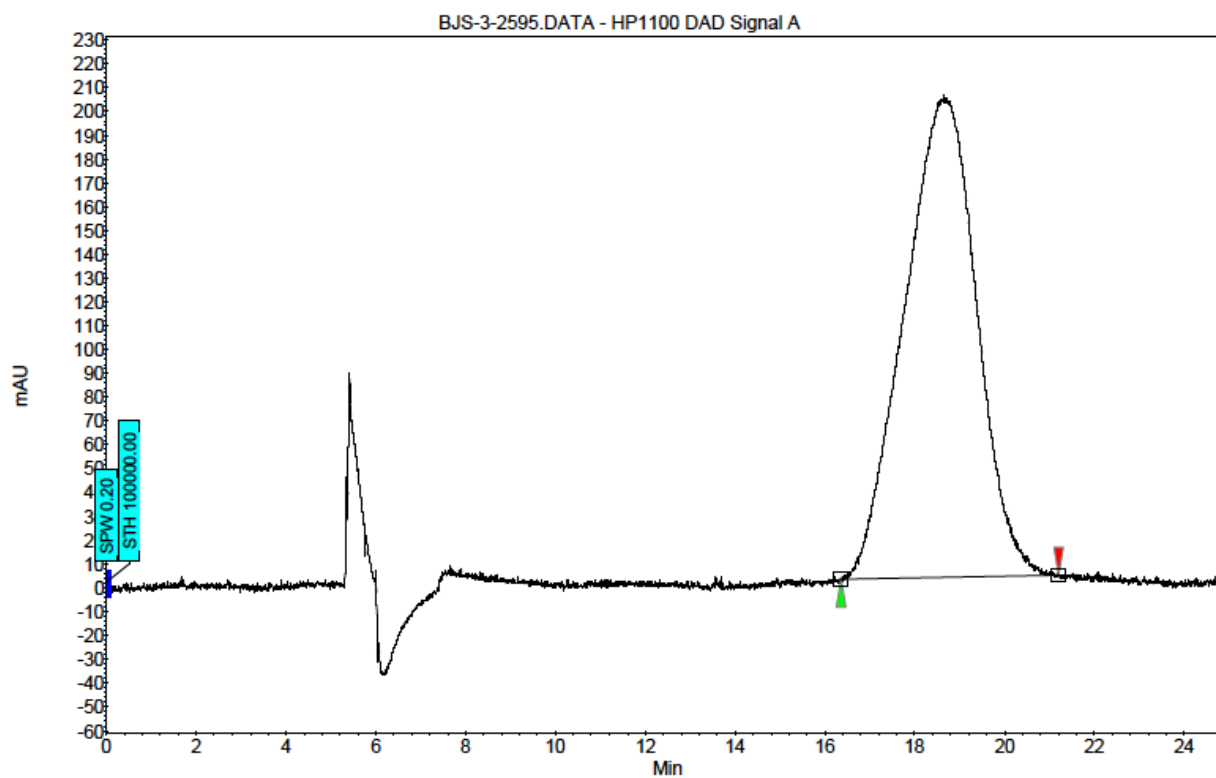

| Index | Name    | Start [Min] | Time [Min] | End [Min] | RT Offset [Min] | Quantity [% Area] | Height [μV] | Area [μV.Min] | Area [%] |
|-------|---------|-------------|------------|-----------|-----------------|-------------------|-------------|---------------|----------|
| 1     | UNKNOWN | 16.36       | 18.64      | 21.20     | 0.00            | 100.00            | 202.4       | 375.6         | 100.000  |
| Total |         |             |            |           |                 | 100.00            | 202.4       | 375.6         | 100.000  |

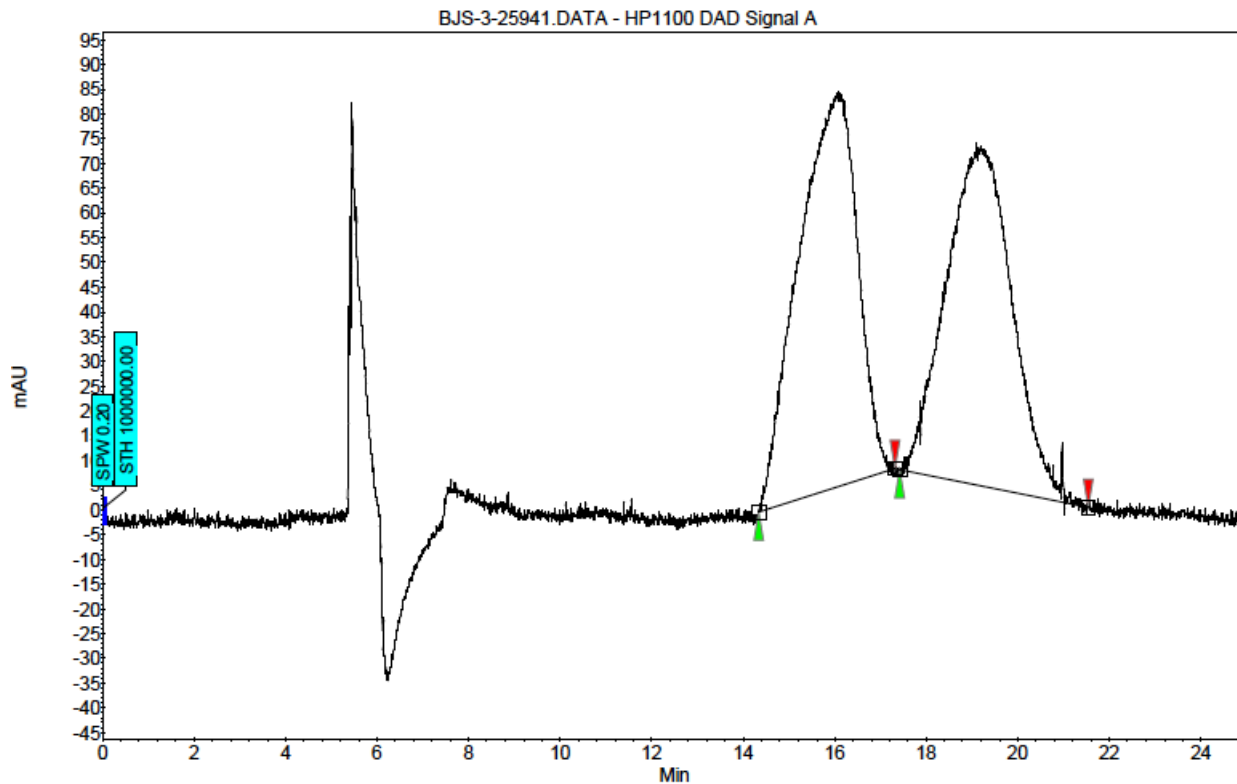

| Index | Name    | Start | Time  | End   | RT Offset | Quantity | Height     | Area           | Area    |
|-------|---------|-------|-------|-------|-----------|----------|------------|----------------|---------|
|       |         | [Min] | [Min] | [Min] | [Min]     | [% Area] | [ $\mu$ V] | [ $\mu$ V.Min] | [%]     |
| 1     | UNKNOWN | 14.34 | 16.07 | 17.31 | 0.00      | 50.91    | 79.8       | 118.9          | 50.910  |
| 2     | UNKNOWN | 17.42 | 19.10 | 21.53 | 0.00      | 49.09    | 69.1       | 114.7          | 49.090  |
| Total |         |       |       |       |           | 100.00   | 148.9      | 233.6          | 100.000 |

Chiral SFC analysis of **rac-42** did not lead to separation of the enantiomers. The diastereomeric ratio of **42** was then determined by coupling with enantiopure carboxylic acid **SI-47**.

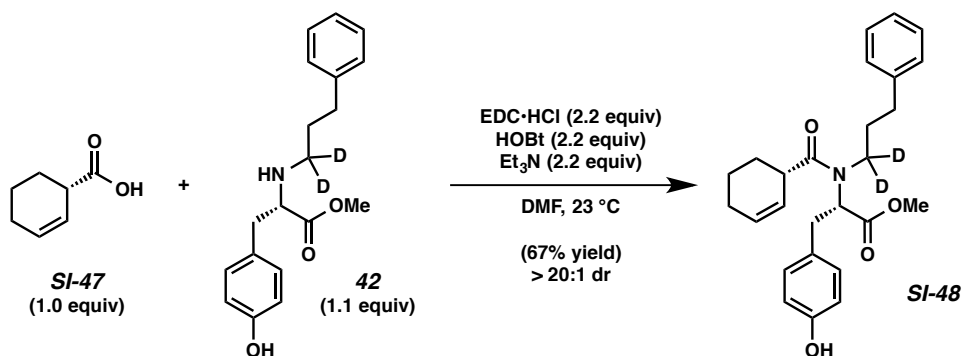

**Amide SI-48.** To a solution of carboxylic acid **SI-47** (7.3 mg, 0.058 mmol, 1.0 equiv), HOBT (17.3 mg, 0.128 mmol, 2.2 equiv), and EDC·HCl (24.5 mg, 0.128 mmol, 2.2 equiv) in DMF (582  $\mu$ L, 0.1 M) at 23  $^\circ$ C was added amine **42** (20.2 mg, 0.064 mmol, 1.1 equiv), followed by

triethylamine (17.8  $\mu\text{L}$ , 0.128 mmol, 2.2 equiv) under a  $\text{N}_2$  atmosphere. The reaction mixture stirred at 23  $^\circ\text{C}$  for 18 h. The reaction was diluted with deionized water (2 mL) and transferred to a separatory funnel with EtOAc (3 mL). The layers were separated and the aqueous layer was extracted with EtOAc (3 x 3 mL). The organic layers were combined and washed with water (3 x 3 mL), dried over  $\text{Na}_2\text{SO}_4$ , and the volatiles were removed under reduced pressure. The resulting crude residue was purified by preparative thin-layer chromatography (3:1 Hexanes:EtOAc) to yield amide **SI-48** (16.6 mg, 67% yield, > 20:1 dr) as a colorless oil. Amide **SI-48**:  $R_f$  0.50 (2:1 Hexanes:EtOAc);  $^1\text{H}$  NMR (500 MHz,  $\text{CDCl}_3$ ):  $\delta$  7.27–7.24 (m, 2H), 7.19–7.17 (m, 3H), 7.14–7.12 (m, 2H), 7.00–6.99 (m, 2H), 5.74–5.73 (m, 2H), 3.63 (s, 3H), 3.47 (t,  $J = 6.9$ , 1H), 2.92 (d,  $J = 6.9$ , 2H), 2.83–2.78 (m, 1H), 2.59 (t,  $J = 7.7$ , 2H), 2.40–2.38 (m, 2H), 2.19–2.14 (m, 3H), 1.87–1.81 (m, 1H), 1.80–1.70 (m, 2H);  $^2\text{H}$  NMR (76 MHz,  $\text{CD}_2\text{Cl}_2$ ):  $\delta$  2.61, 2.45;  $^{13}\text{C}$  NMR (125 MHz,  $\text{CDCl}_3$ ):  $\delta$  175.2, 174.5, 149.8, 142.1, 134.9, 130.2, 128.5, 128.4, 126.9, 125.9, 125.1, 121.6, 63.1, 51.8, 47.3 (m), 39.5, 39.3, 33.4, 31.5, 27.5, 25.2, 24.5 IR (film): 3331, 3025, 2925, 1752, 1507  $\text{cm}^{-1}$ ; HRMS-APCI ( $m/z$ )  $[\text{M} + \text{H}]^+$  calcd for  $\text{C}_{26}\text{H}_{30}\text{D}_2\text{NO}_4$ , 424.24514; found 424.24403;  $[\alpha]^{31.3}_{\text{D}} -34.00^\circ$  ( $c = 0.10$ ,  $\text{CH}_2\text{Cl}_2$ ).

The enantiomeric ratio of **43** was determined by chiral SFC analysis.

| Compound                                                                                             | Method<br>Column<br>/Temp                         | Polar<br>Cosolvent | Method<br>Flow<br>Rate | Retention<br>Times                   | Enantiomeric<br>Ratio<br>(er) |
|------------------------------------------------------------------------------------------------------|---------------------------------------------------|--------------------|------------------------|--------------------------------------|-------------------------------|
| 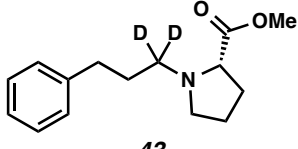<br><b>43</b>     | Daicel<br>ChiralPak<br>OB-H / 35 $^\circ\text{C}$ | 3% iPrOH           | 3.00<br>mL/min         | 4.50/5.10<br>min                     | 0:100                         |
| <br><i>rac-43</i> | Daicel<br>ChiralPak<br>OB-H / 35 $^\circ\text{C}$ | 3% iPrOH           | 3.00<br>mL/min         | 3.92/4.43<br>min<br>4.44/5.06<br>min | 50:50                         |

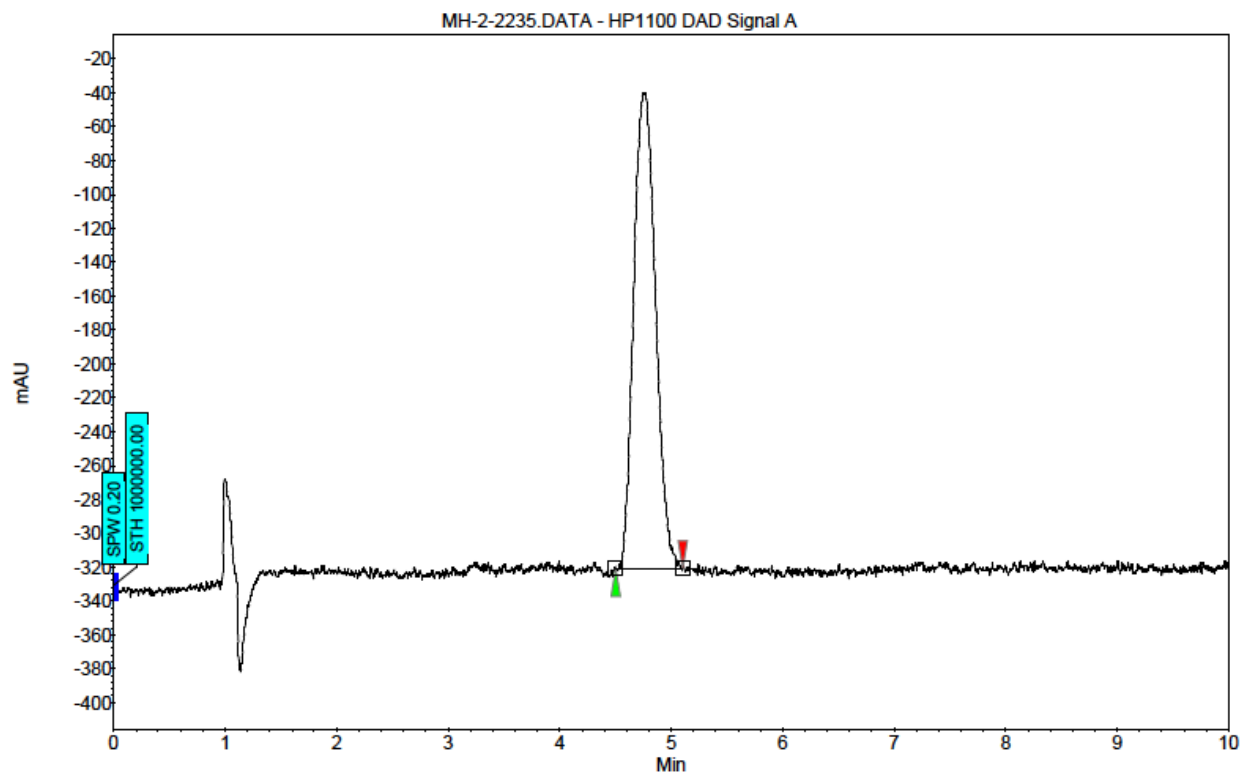

| Index | Name    | Start | Time  | End   | RT Offset | Quantity | Height     | Area           | Area    |
|-------|---------|-------|-------|-------|-----------|----------|------------|----------------|---------|
|       |         | [Min] | [Min] | [Min] | [Min]     | [% Area] | [ $\mu$ V] | [ $\mu$ V.Min] | [%]     |
| 1     | UNKNOWN | 4.50  | 4.75  | 5.10  | 0.00      | 100.00   | 280.7      | 63.7           | 100.000 |
| Total |         |       |       |       |           | 100.00   | 280.7      | 63.7           | 100.000 |

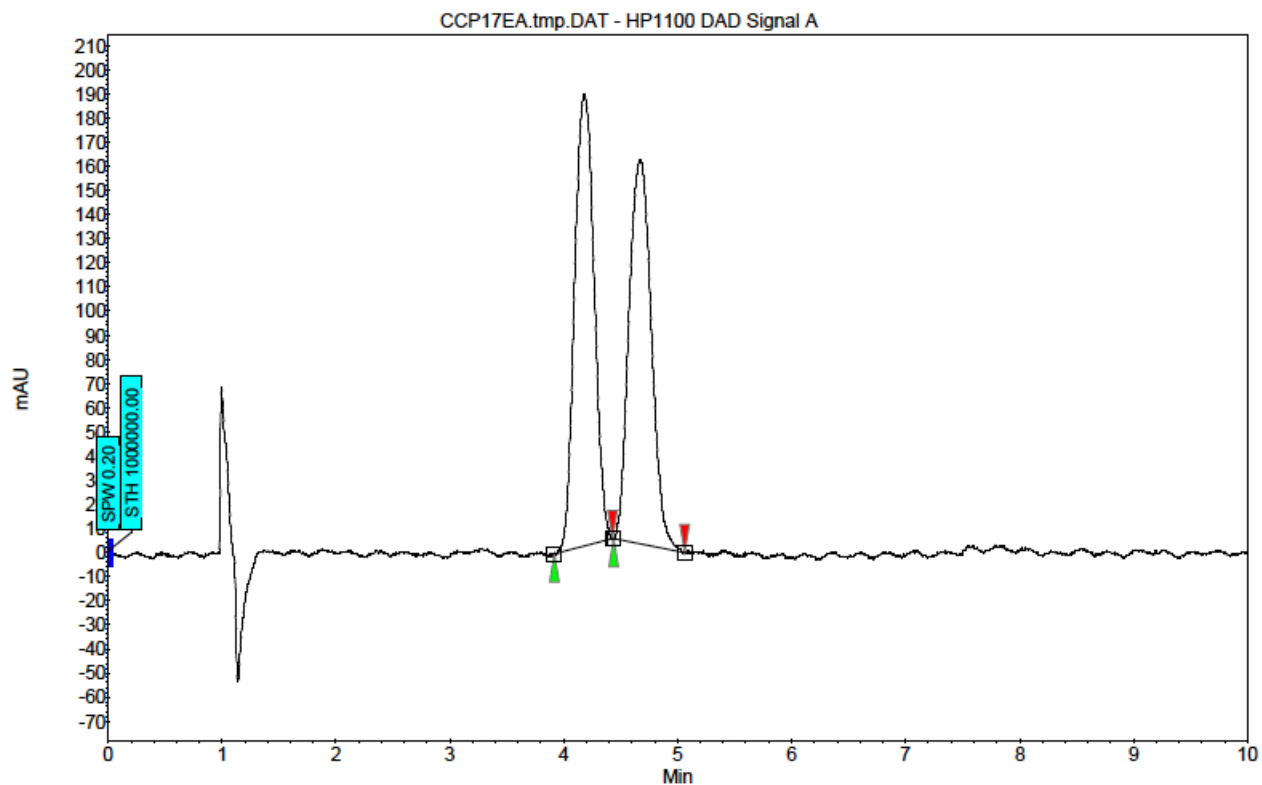

| Index | Name    | Start Time | End   | RT Offset | Quantity | Height   | Area       | Area           |         |
|-------|---------|------------|-------|-----------|----------|----------|------------|----------------|---------|
|       |         | [Min]      | [Min] | [Min]     | [Min]    | [% Area] | [ $\mu$ V] | [ $\mu$ V.Min] |         |
| 1     | UNKNOWN | 3.92       | 4.18  | 4.43      | 0.00     | 50.60    | 187.4      | 37.1           |         |
| 2     | UNKNOWN | 4.44       | 4.67  | 5.06      | 0.00     | 49.40    | 159.2      | 36.3           |         |
| Total |         |            |       |           |          | 100.00   | 346.7      | 73.4           | 100.000 |

The enantiomeric ratio of **44** was determined by chiral SFC analysis.

| Compound                    | Method<br>Column<br>/Temp           | Polar<br>Cosolvent                                | Method<br>Flow<br>Rate | Retention<br>Times                       | Enantiomeric<br>Ratio<br>(er) |
|-----------------------------|-------------------------------------|---------------------------------------------------|------------------------|------------------------------------------|-------------------------------|
| <p><b>44</b></p>            | Daicel<br>ChiralPak<br>OD-H / 35 °C | 15% MeOH,<br>2.00 min<br><br>10%/min,<br>25% MeOH | 4.00<br>mL/min         | 2.09/2.65<br>min                         | 0:100                         |
| <p><i>rac</i>-<b>44</b></p> | Daicel<br>ChiralPak<br>OD-H / 35 °C | 15% MeOH,<br>2.00 min<br><br>10%/min,<br>25% MeOH | 4.00<br>mL/min         | 1.78/2.03<br>min<br><br>2.10/2.56<br>min | 43:57                         |

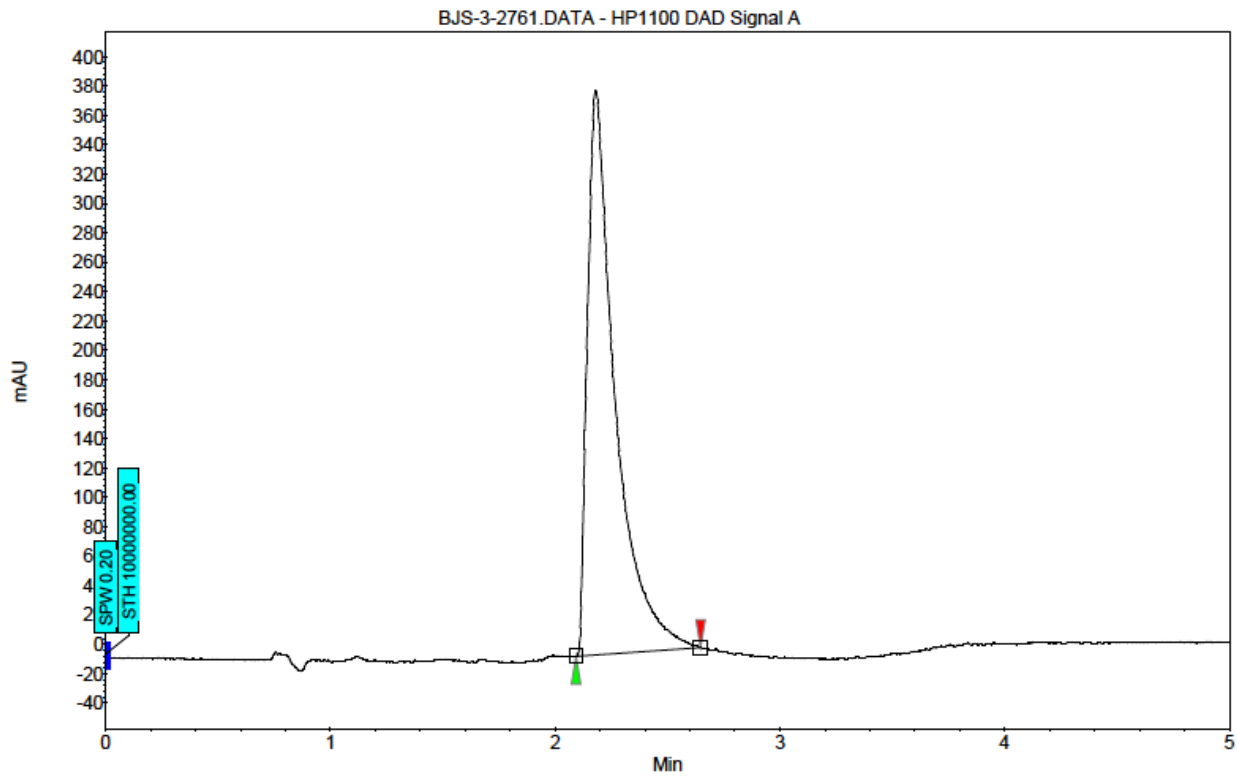

| Index | Name    | Start Time |       | End   | RT Offset | Quantity | Height     | Area           | Area    |
|-------|---------|------------|-------|-------|-----------|----------|------------|----------------|---------|
|       |         | [Min]      | [Min] | [Min] | [Min]     | [% Area] | [ $\mu$ V] | [ $\mu$ V.Min] | [%]     |
| 1     | UNKNOWN | 2.09       | 2.18  | 2.65  | 0.00      | 100.00   | 384.5      | 54.9           | 100.000 |
| Total |         |            |       |       |           | 100.00   | 384.5      | 54.9           | 100.000 |

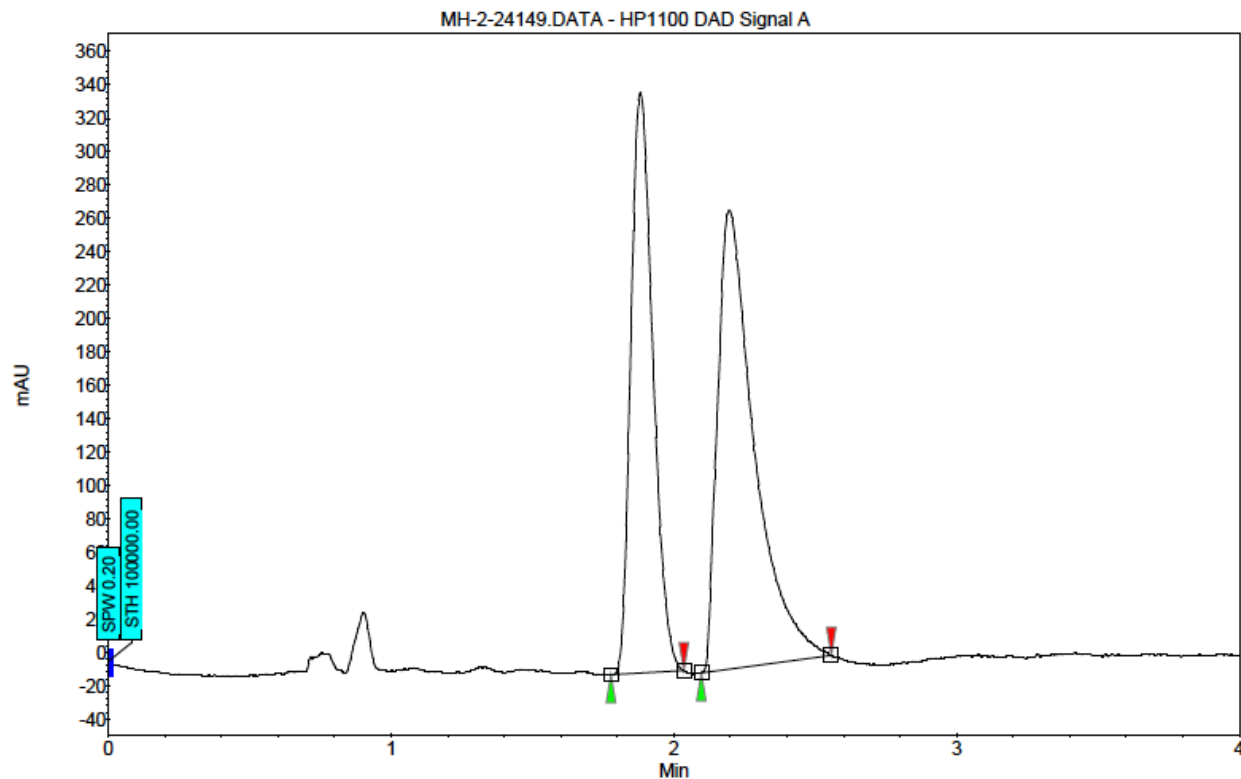

| Index | Name    | Start Time [Min] | End Time [Min] | RT Offset [Min] | Quantity [% Area] | Height [μV] | Area [μV.Min] | Area [%] |         |
|-------|---------|------------------|----------------|-----------------|-------------------|-------------|---------------|----------|---------|
| 1     | UNKNOWN | 1.78             | 1.88           | 2.03            | 0.00              | 43.15       | 347.9         | 31.4     |         |
| 2     | UNKNOWN | 2.10             | 2.20           | 2.56            | 0.00              | 56.85       | 275.2         | 41.4     |         |
| Total |         |                  |                |                 |                   | 100.00      | 623.1         | 72.8     | 100.000 |

Chiral SFC analysis of **rac-45** did not lead to separation of the enantiomers. For this reason, acetate **45** was converted to alcohol **44** and the enantiomeric ratio was determined by chiral SFC analysis in comparison to **rac-44**.

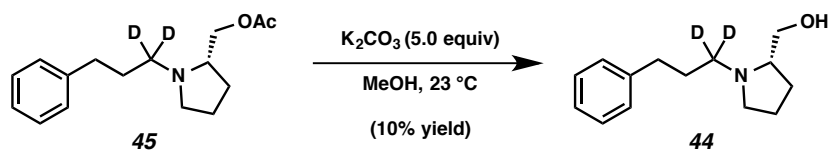

**Amine 44.** To a solution of amine **45** (20.0 mg, 0.073 mmol, 1 equiv) in MeOH (726 μL, 0.1 M) at 23 °C was added  $K_2CO_3$  (50.2 mg, 0.363 mmol, 5 equiv) in one portion. The reaction was stirred vigorously for 1 h. The reaction mixture was diluted with EtOAc (10 mL) and transferred to a separatory funnel. Deionized  $H_2O$  (10 mL) was added, the layers separated, and the aqueous layer was extracted with EtOAc (3 x 10 mL). The combined organics were washed with

saturated aqueous NaCl (5 mL) and dried over Na<sub>2</sub>SO<sub>4</sub>. The volatiles were removed under reduced pressure, and the resulting crude residue was purified by preparative thin-layer chromatography (EtOAc, 2% Et<sub>3</sub>N) to yield amine **44** (1.6 mg, 10% yield) as a colorless oil.

| Compound                                                                                               | Method Column /Temp           | Polar Cosolvent                         | Method Flow Rate | Retention Times                | Enantiomeric Ratio (er) |
|--------------------------------------------------------------------------------------------------------|-------------------------------|-----------------------------------------|------------------|--------------------------------|-------------------------|
| 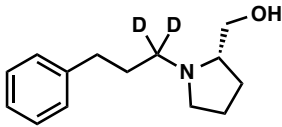 <p><b>44</b></p>     | Daicel ChiralPak OD-H / 35 °C | 15% MeOH, 2.00 min<br>10%/min, 25% MeOH | 4.00 mL/min      | 2.10/2.76 min                  | 0:100                   |
|  <p><i>rac</i>-44</p> | Daicel ChiralPak OD-H / 35 °C | 15% MeOH, 2.00 min<br>10%/min, 25% MeOH | 4.00 mL/min      | 1.78/2.03 min<br>2.10/2.56 min | 43:57                   |



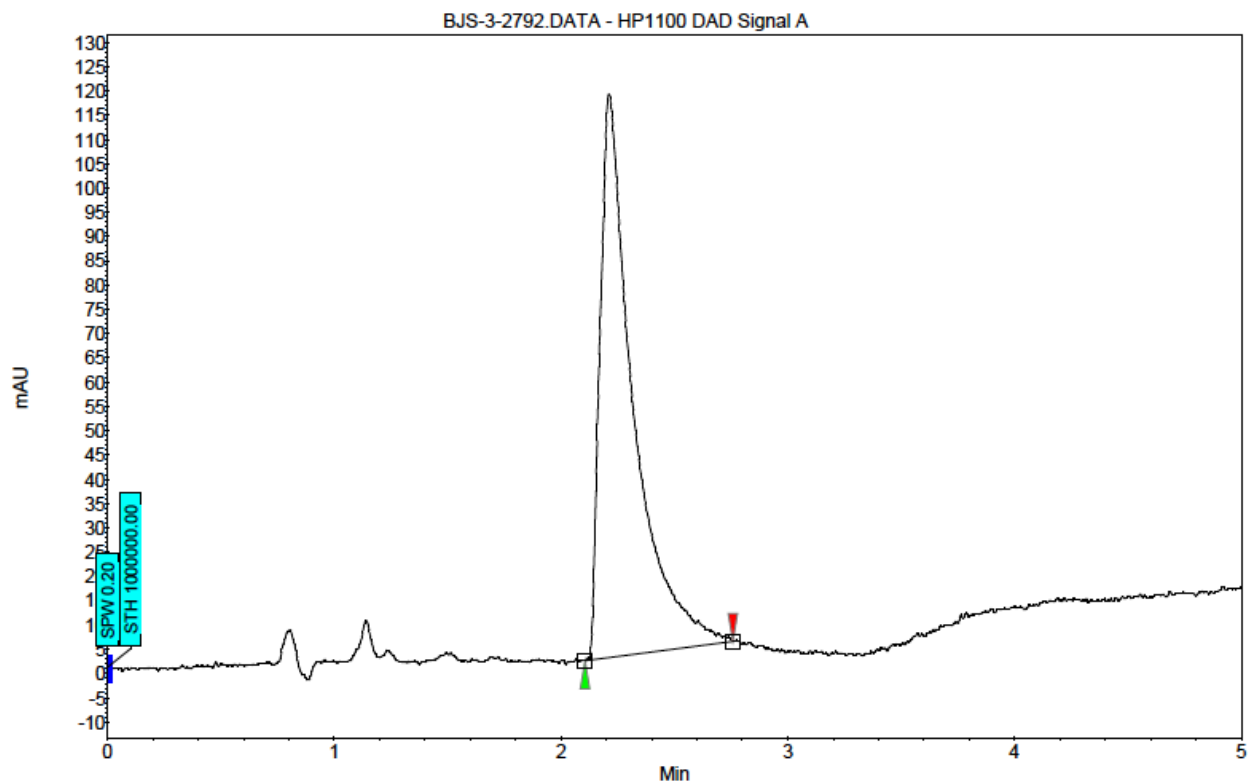

| Index | Name    | Start Time | End   | RT Offset | Quantity | Height   | Area       | Area           |
|-------|---------|------------|-------|-----------|----------|----------|------------|----------------|
|       |         | [Min]      | [Min] | [Min]     | [Min]    | [% Area] | [ $\mu$ V] | [ $\mu$ V.Min] |
| 1     | UNKNOWN | 2.10       | 2.21  | 2.76      | 0.00     | 100.00   | 116.0      | 19.7           |
|       |         |            |       |           |          |          |            |                |
| Total |         |            |       |           |          | 100.00   | 116.0      | 19.7           |



| Index | Name    | Start Time [Min] | End Time [Min] | RT Offset [Min] | Quantity [% Area] | Height [μV] | Area [μV.Min] | Area [%] |
|-------|---------|------------------|----------------|-----------------|-------------------|-------------|---------------|----------|
| 1     | UNKNOWN | 1.78             | 1.88           | 2.03            | 0.00              | 43.15       | 347.9         | 43.149   |
| 2     | UNKNOWN | 2.10             | 2.20           | 2.56            | 0.00              | 56.85       | 275.2         | 56.851   |
| Total |         |                  |                |                 |                   | 100.00      | 623.1         | 72.8     |

### I. Procedure for Reduction Performed on 1.0 mmol Scale

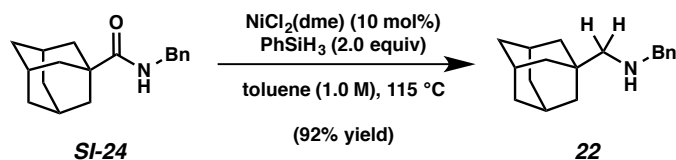

**Representative procedure for the 1.0 mmol scale reduction of amide SI-24. Amine 22.** A 20-scintillation vial was charged with a magnetic stir bar, flame-dried under reduced pressure, and allowed to cool under a N<sub>2</sub> atmosphere. Amide substrate **SI-24** (269.2 mg, 1.000 mmol, 1.0 equiv) and NiCl<sub>2</sub>(dme) (21.9 mg, 0.1000 mmol, 10 mol %) was added, and the vial was flushed with N<sub>2</sub> for 10 min. PhSiH<sub>3</sub> (246.7 μL, 2.000 mmol, 2.0 equiv) was added under a N<sub>2</sub> atmosphere via syringe followed by toluene (1.0 mL, 1.0 M). The vial was then capped with a Teflon-lined screw cap under a flow of N<sub>2</sub>. The reaction mixture was then placed in a pre-heated aluminum

block and allowed to stir at 115 °C for 24 h. After cooling to room temperature, the reaction mixture was transferred to a separatory funnel with EtOAc (10 mL) and basified with 1.0 M aqueous NaOH (10 mL). The layers were separated and the aqueous layer was extracted with EtOAc (3 x 30 mL). The combined organic layers were washed with saturated aqueous NaCl (45 mL). The volatiles were removed under reduced pressure, and the crude residue was purified by flash chromatography (4:1 Hexanes:EtOAc, 2% Et<sub>3</sub>N) to yield amine **22** (92% yield) as a colorless oil. Amine **22**: R<sub>f</sub> 0.52 (4:1 Hexanes:EtOAc, 2% Et<sub>3</sub>N). Spectral data match those previously reported.<sup>31</sup>

## References

- <sup>1</sup> Fu, R.; Yang, Y.; Ma, Y.; Yang, F.; Li, J.; Chai, W.; Wang, Q.; Yuan, R. *Tetrahedron Lett.* **2015**, *56*, 4527–4531.
- <sup>2</sup> Kosal, A. D.; Wilson, E. E.; Ashfeld, B. L. *Angew. Chem. Int. Ed.* **2012**, *51*, 12036–12040.
- <sup>3</sup> Kulkarni, S. S.; Hu, X.; Manetsch, R. *Chem. Commun.* **2013**, *49*, 1193–1195.
- <sup>4</sup> Bavetsias, V.; Faisal, A.; Crumpler, S. et al. *J. Med. Chem.* **2013**, *56*, 9122–9135.
- <sup>5</sup> Caldwell, N.; Jamieson, C.; Simpson, I.; Watson, A. J. B. *Chem. Commun.* **2015**, *51*, 9495–9498.
- <sup>6</sup> Chen, C.; Hong, S. K. *Org. Lett.* **2012**, *14*, 2992–2995.
- <sup>7</sup> Lawrence, N.; Sebt, S.; Pireddu, R. *Novel Rho Kinase Inhibitors and Methods of use*. U.S. Patent 20140179689A1, Oct. 4, 2012.
- <sup>8</sup> Henry, C.; Bolien, D.; Ibanescu, B.; Bloodworth, S.; Harrowven, D. C.; Zhang, X.; Craven, A.; Sneddon, H. F.; Whitby, R. J. *Eur. J. Org. Chem.* **2015**, *7*, 1491–1499.
- <sup>9</sup> Maki, T.; Ishihara, K.; Yamamoto, H. *Org. Lett.* **2006**, *8*, 1431–1434.
- <sup>10</sup> Zampller, D.; Mamolo, M. G.; Laurin, E.; Florio, C.; Zanette, C.; Fermeglia, M.; Poscocco, P.; Paneni, M. S.; Prici, S.; Vio, L. *J. Med. Chem.* **2009**, *52*, 5380–5393.
- <sup>11</sup> Soulé, J.-F.; Miyamura, H.; Kobayashi, S. *Chem. Asian J.* **2013**, *8*, 2614–2626.
- <sup>12</sup> Lamar, A. A.; Liebeskind, L. S. *Tetrahedron Lett.* **2015**, *56*, 6034–6037.
- <sup>13</sup> Yang, C.-C.; Tai, H.-M.; Sun, P.-J. *Synlett* **1997**, *7*, 812–814.
- <sup>14</sup> Zhou, S.; Junge, K.; Addis, D.; Das, S.; Beller, M. *Angew. Chem. Int. Ed.* **2009**, *48*, 9507–9510.
- <sup>15</sup> Xia, J.-J.; Li, X.-Y.; Zhang, S.-Z.; Liu, J.-Q.; Zhang, W.-M.; Yan, Y.-X.; Ding, Z.-T.; Qiu, M.-H. *Tetrahedron Lett.* **2014**, *55*, 2104–2106.
- <sup>16</sup> Saito, Y.; Ouchi, H.; Takahata, H. *Tetrahedron* **2008**, *64*, 11129–11135.
- <sup>17</sup> Toledo, H.; Pisarevsky, E.; Abramovich, A.; Szpilman, A. M. *Chem. Commun.* **2013**, *49*, 4367–4369.
- <sup>18</sup> Watson, A. J. A.; Maxwell, A. C.; Williams, J. M. J. *Org. Lett.* **2009**, *11*, 2667–2670.
- <sup>19</sup> Evans, D. A.; Borg, G.; Scheidt, K. A. *Angew. Chem. Int. Ed.* **2002**, *41*, 3188–3191.
- <sup>20</sup> Kern, N.; Hoffmann, M.; Weibel, J.-M.; Pale, P.; Blanc, A. *Tetrahedron* **2014**, *70*, 5519–5531.
- <sup>21</sup> Wheeler, P.; Vora, H. U.; Rovis, T. *Chem. Sci.* **2013**, *4*, 1674–1679.
- <sup>22</sup> Bartuschat, A. L.; Wicht, K.; Heinrich, M. R. *Angew. Chem. Int. Ed.* **2015**, *54*, 10294–10298.

- <sup>23</sup> Takaharu, T.; Naoki, H.; Masayuki, S.; Masaki, H. *Novel Biologically Active Compound Having Anti-Prolyl Endopeptidase Activity*. U.S. Patent 19864743616, Feb. 26, 1986.
- <sup>24</sup> Dang, T. T.; Ramalingam, B.; Shan, S. P.; Seayad, A. M. *ACS Catalysis* **2013**, *3*, 2356–2540.
- <sup>25</sup> Lee, O.-Y.; Law, K.-L.; Yang, D. *Org. Lett.* **2009**, *11*, 3302–3305.
- <sup>26</sup> Cheng, C.; Brookhart, M. *J. Am. Chem. Soc.* **2012**, *134*, 11304–11307.
- <sup>27</sup> Silvers, M. A.; Robertson, G. T.; Taylor, C. M.; Waldrop, G. L. *J. Med. Chem.* **2014**, *57*, 8947–8959.
- <sup>28</sup> Das, S.; Join, B.; Junge, K.; Beller, M. *Chem. Commun.* **2012**, *48*, 2683–2685.
- <sup>29</sup> Parks, B. W.; Gilbertson, R. D.; Domaille, D. W.; Hutchison, J. E. *J. Org. Chem.* **2006**, *71*, 9622–9627.
- <sup>30</sup> Chao, B. T.; Kang, S. K. *Tetrahedron* **2005**, *61*, 5725–5734.
- <sup>31</sup> Popov, Y. V.; Mokhov, V. M.; Tankabekyan, N. A. *Russ. J. Gen. Chem.* **2014**, *84*, 826–830.
- <sup>32</sup> Salvatore, R. N.; Nagle, A. S.; Jung, K. W. *J. Org. Chem.* **2002**, *67*, 674–683.
- <sup>33</sup> Moriya, T.; Yoneda, S.; Kawana, K.; Ikeda, R.; Konakahara, T.; Sakai, N. *J. Org. Chem.* **2013**, *78*, 10642–10650.
- <sup>34</sup> Bélanger, G.; Doré, M.; Ménard, F.; Darsigny, V. *J. Org. Chem.* **2006**, *71*, 7481–7484.
- <sup>35</sup> Li, S.; Huang, K.; Zhang, J.; Wu, W.; Zhang, X. *Org. Lett.* **2013**, *15*, 3078–3081.
- <sup>36</sup> Jeong, J.; Lee, D.; Chang, S. *Chem. Commun.* **2015**, *51*, 7035–7038.
- <sup>37</sup> Goodman, C. A.; Janci, E. M.; Onwodi, O.; Simpson, C. C.; Hamaker, C. G.; Hitchcock, S. R. *Tetrahedron Lett.* **2015**, *56*, 4468–4471.
- <sup>38</sup> Jorapur, Y. R.; Jeong, J. M.; Chi, D. Y. *Tetrahedron Lett.* **2006**, *47*, 2435–2438.
- <sup>39</sup> Meuresch, M.; Westhues, S.; Leitner, W.; Klankermayer, J. *Angew. Chem. Int. Ed.* **2016**, *55*, 1392–1395.
- <sup>40</sup> Egorov, M.; Delpéch, B.; Aubert, G.; Cresteil, T.; Garcia-Alvarez, M. C.; Collin, P.; Marazano, C. *Org. Biomol. Chem.* **2014**, *12*, 1518–1524.
- <sup>41</sup> Kumar, A.; Pandiakumar, A. K.; Samuelson, A. G. *Tetrahedron* **2014**, *70*, 3185–3190.

# <sup>1</sup>H NMR Spectra

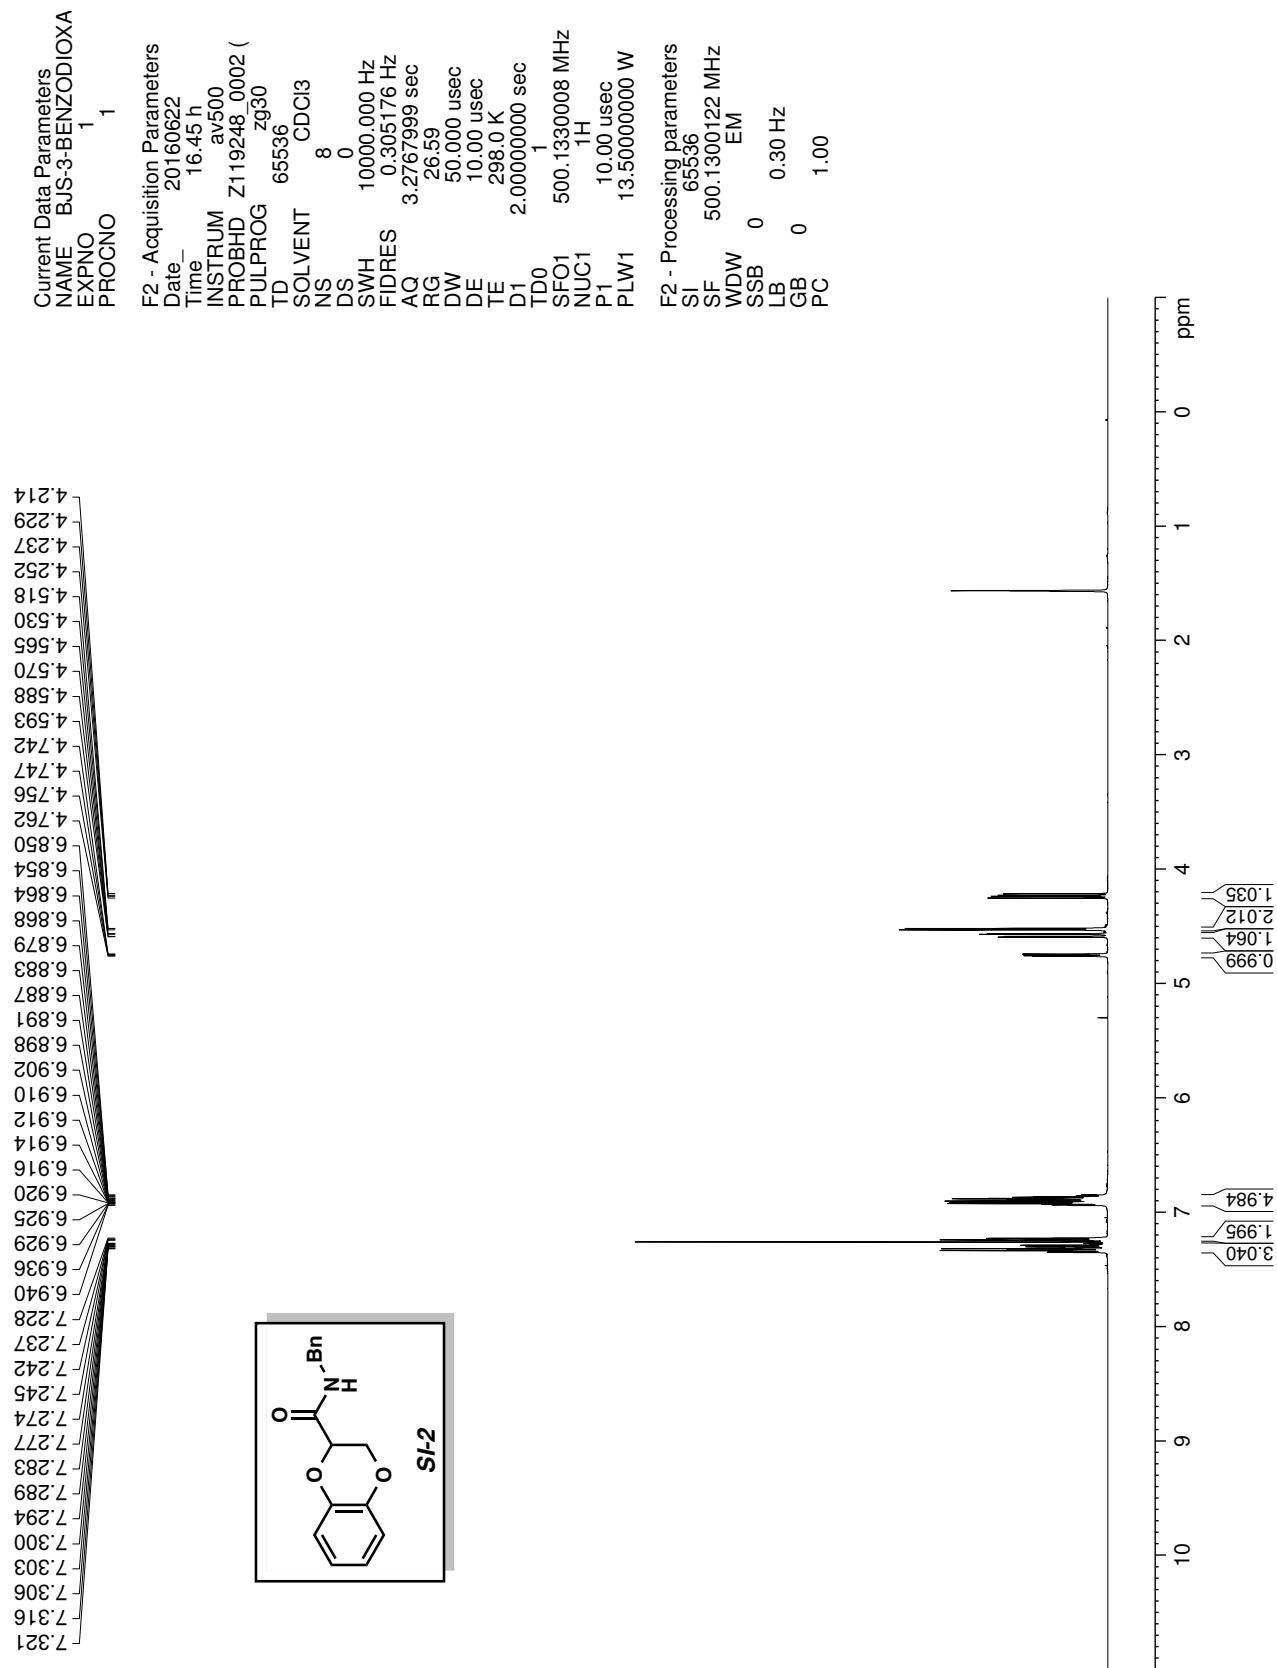

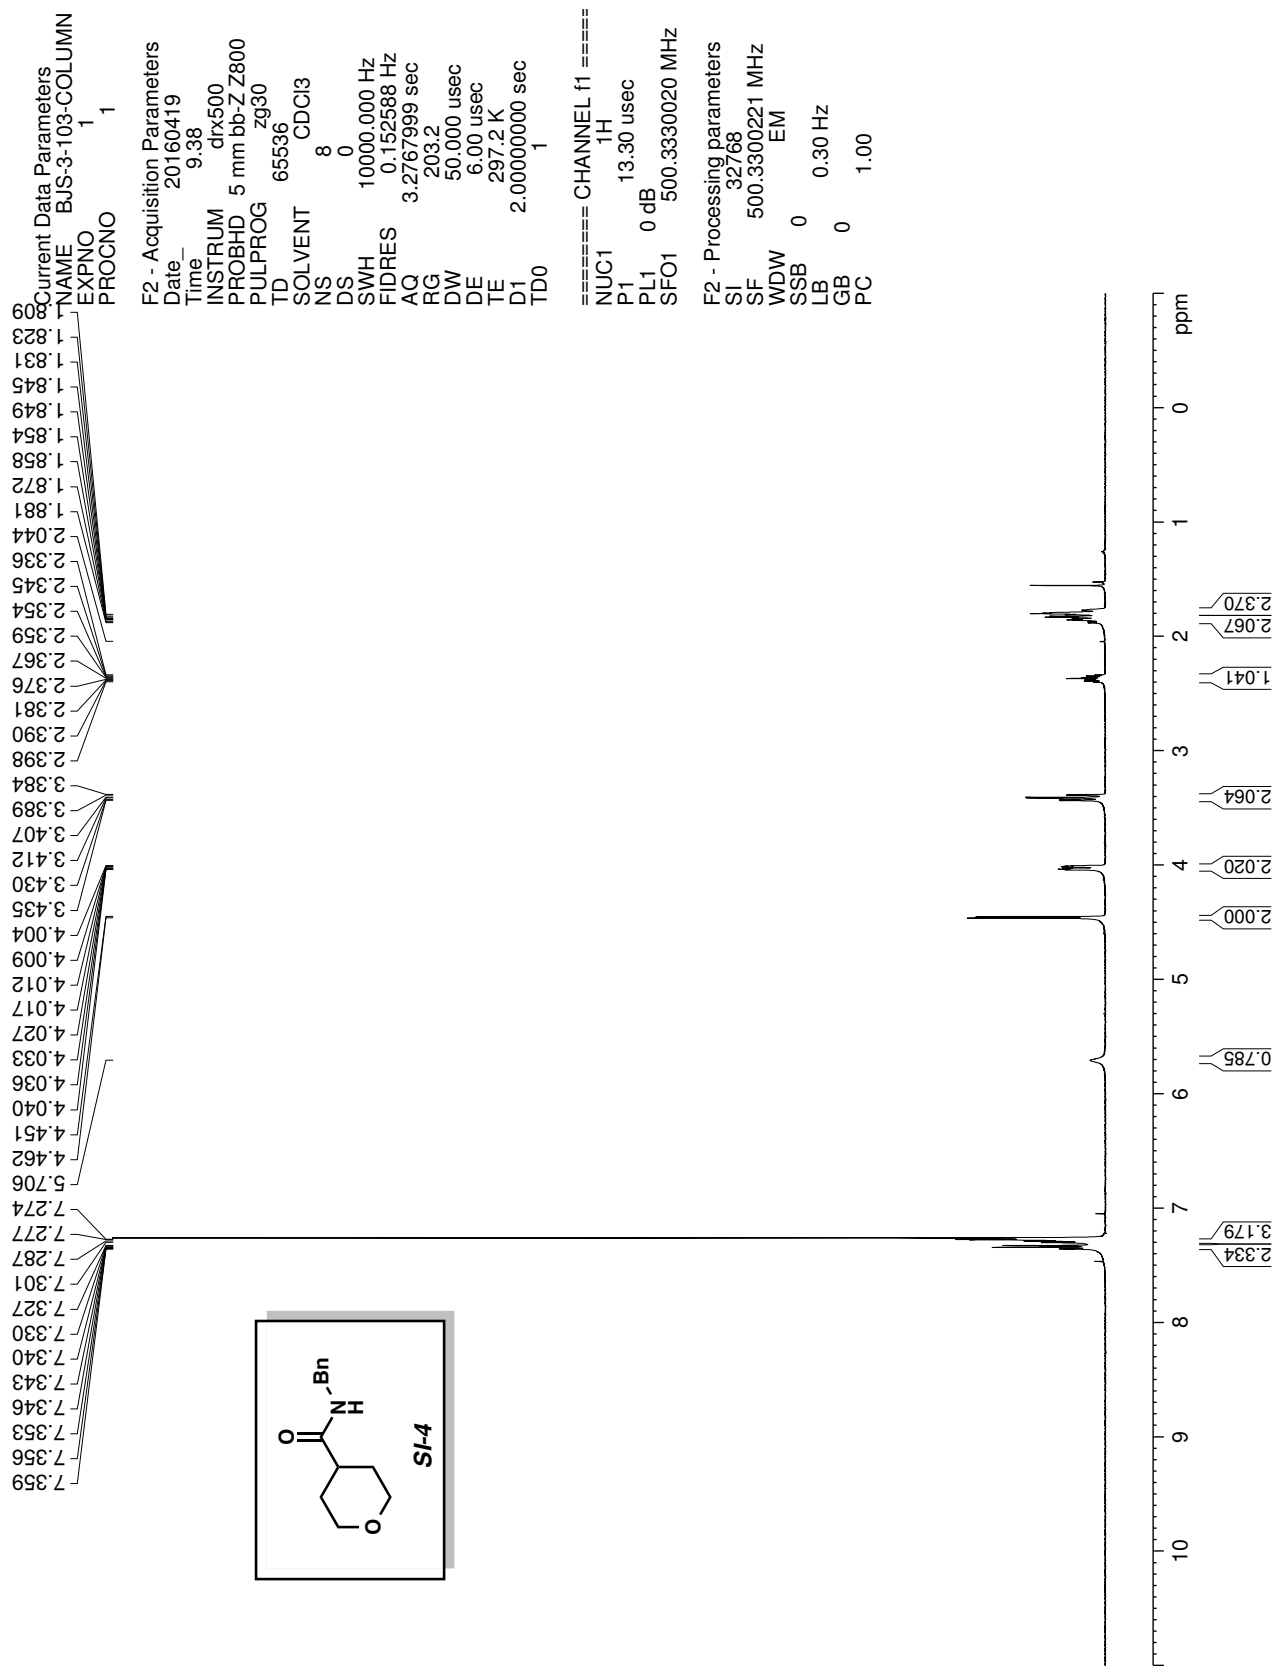

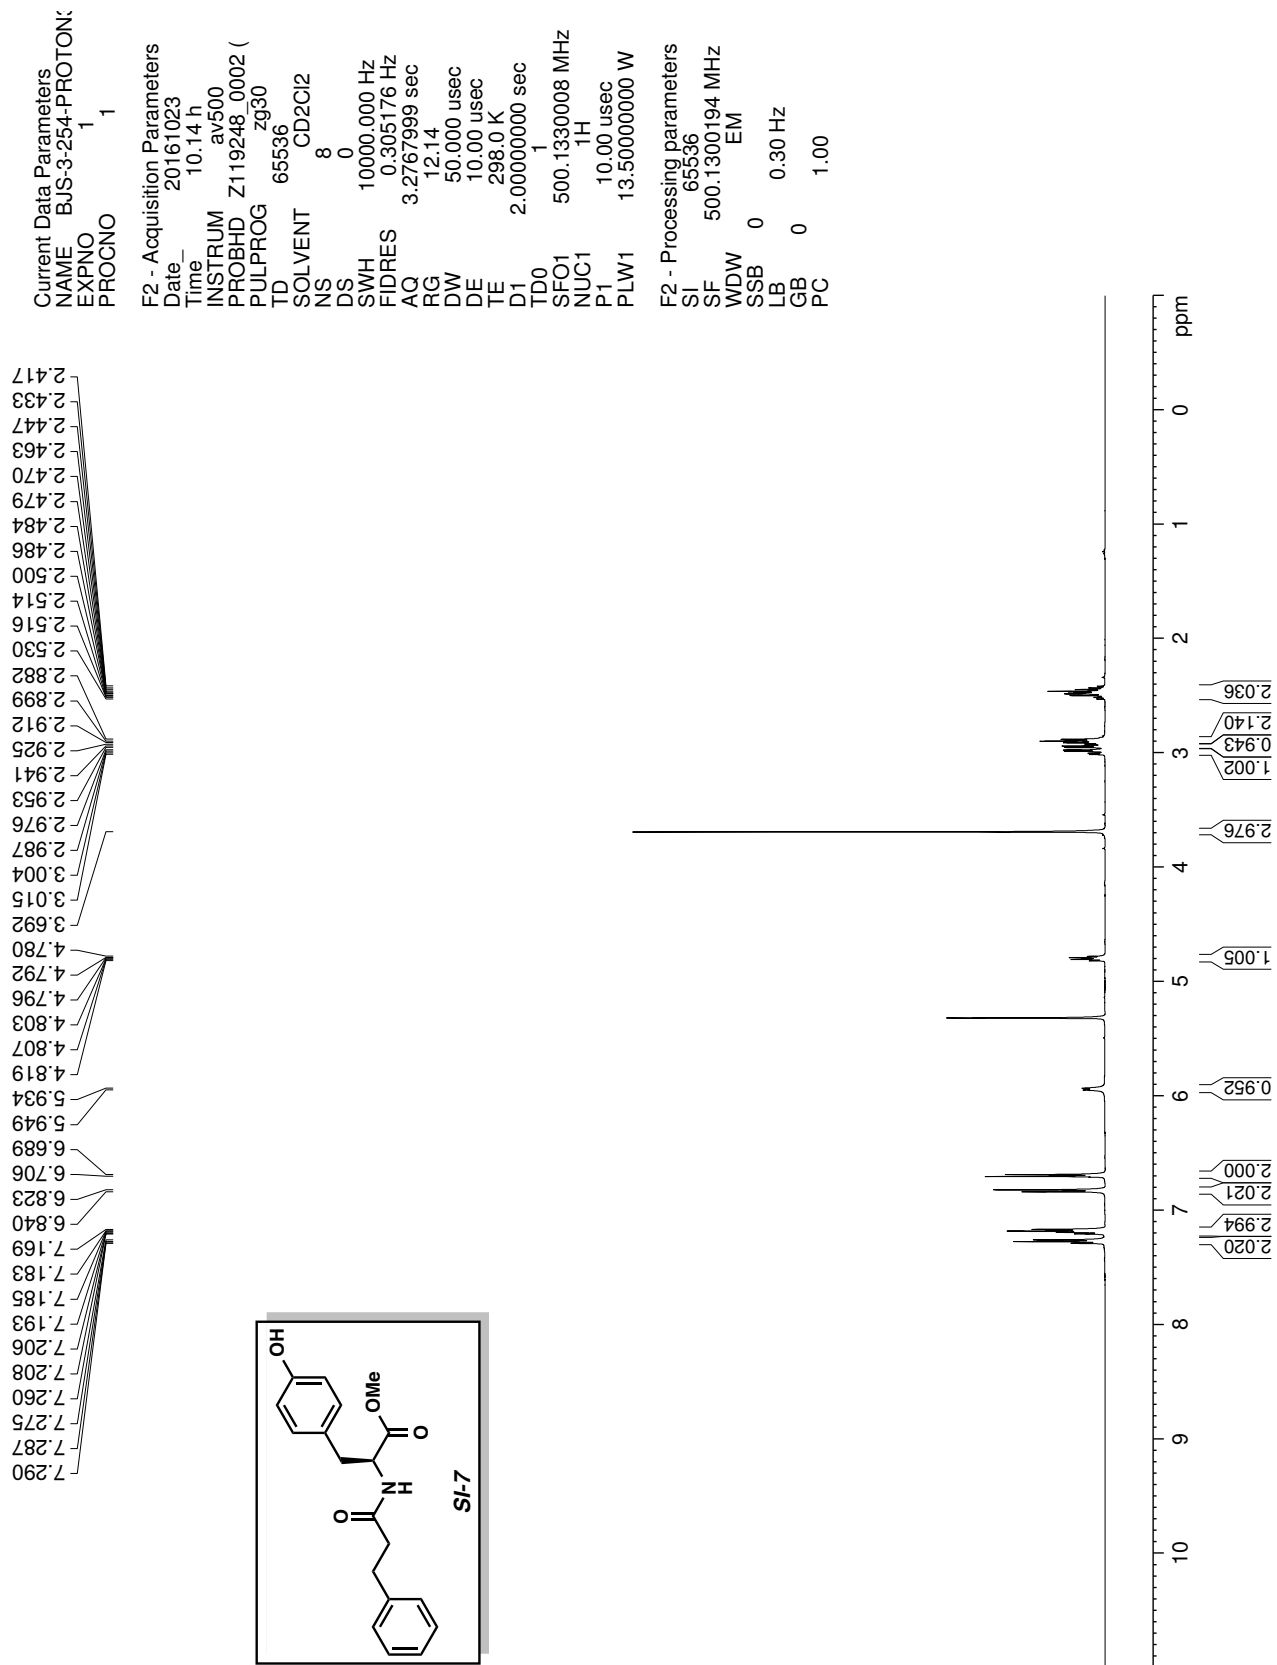



Current Data Parameters  
 NAME BJS-3-PYRAZOLESN  
 EXPNO 1  
 PROCNO 1

F2 - Acquisition Parameters

Date\_ 20160622  
 Time 16.36 h  
 INSTRUM av500  
 PROBHD Z119248\_0002 (  
 PULPROG zg30  
 TD 65536  
 SOLVENT CDCl3  
 NS 8  
 DS 0  
 SWH 10000.000 Hz  
 FIDRES 0.305176 Hz  
 AQ 3.2767999 sec  
 RG 23.34  
 DW 50.000 usec  
 DE 10.00 usec  
 TE 298.0 K  
 D1 2.00000000 sec  
 TD0 1  
 SFO1 500.1330008 MHz  
 NUC1 1H  
 P1 10.00 usec  
 PLW1 13.50000000 W

F2 - Processing parameters

SI 65536  
 SF 500.1300122 MHz  
 WDW EM  
 SSB 0  
 LB 0.30 Hz  
 GB 0  
 PC 1.00

7.830  
 7.705  
 7.363  
 7.347  
 7.334  
 7.322  
 7.305  
 7.300  
 7.293  
 7.288  
 7.281  
 7.275  
 7.271  
 6.056  
 4.594  
 4.582  
 3.911

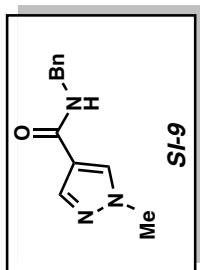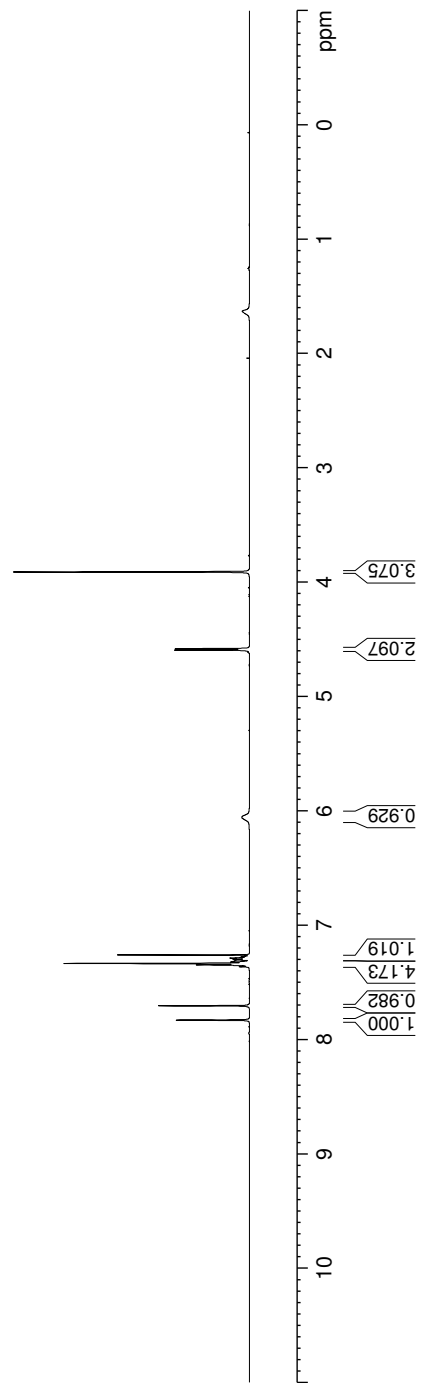

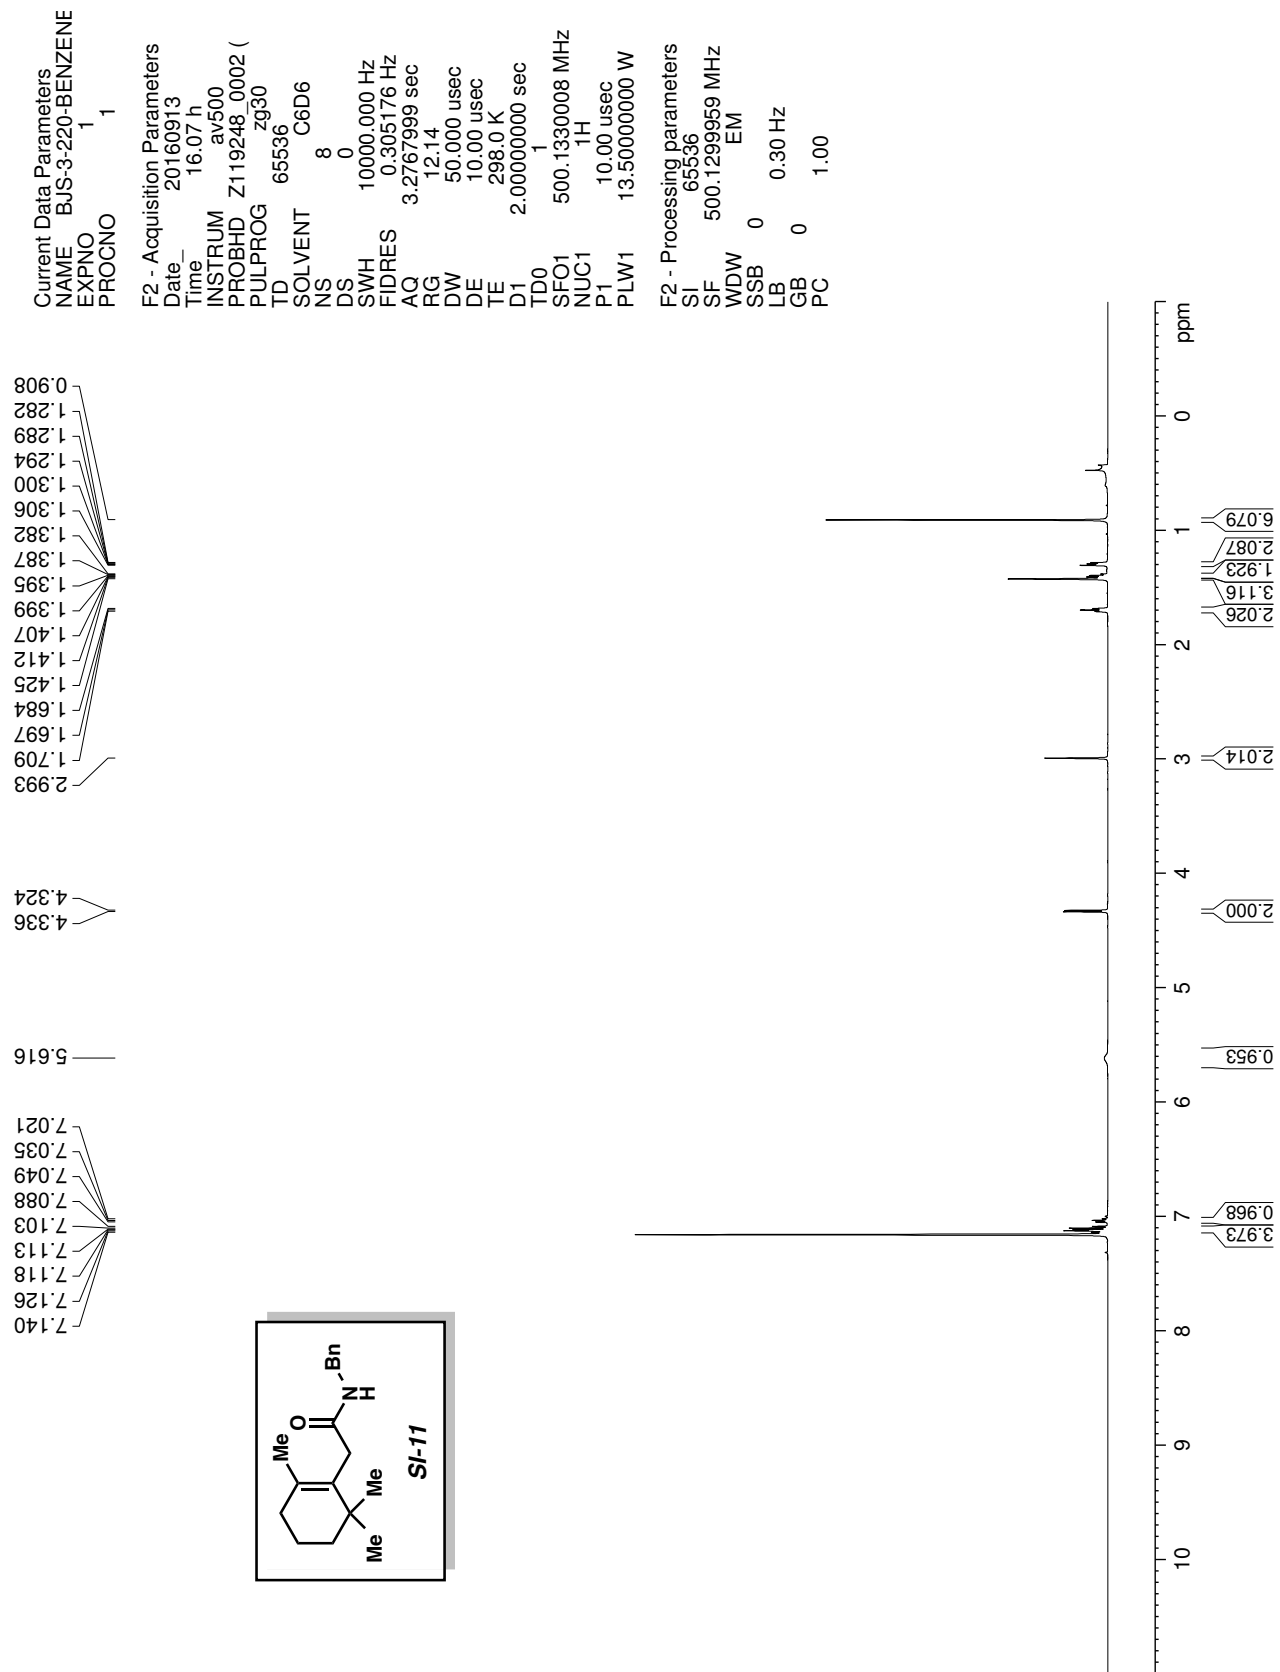

Current Data Parameters  
 NAME MH-2-222-PROTON  
 EXPNO 1  
 PROCNO 1

F2 - Acquisition Parameters

Date\_ 20161019  
 Time 18.44 h  
 INSTRUM av500  
 PROBHD Z119248\_0002 (  
 PULPROG zg30  
 TD 65536  
 SOLVENT CDC13  
 NS 8  
 DS 0  
 SWH 10000.000 Hz  
 FIDRES 0.305176 Hz  
 AQ 3.2767999 sec  
 RG 12.14  
 DW 50.000 usec  
 DE 10.00 usec  
 TE 298.0 K  
 D1 2.00000000 sec  
 TD0 1  
 SFO1 500.1330008 MHz  
 NUC1 1H  
 P1 10.00 usec  
 PLW1 13.50000000 W

F2 - Processing parameters

SI 65536  
 SF 500.1300146 MHz  
 WDW EM  
 SSB 0  
 LB 0.30 Hz  
 GB 0  
 PC 1.00

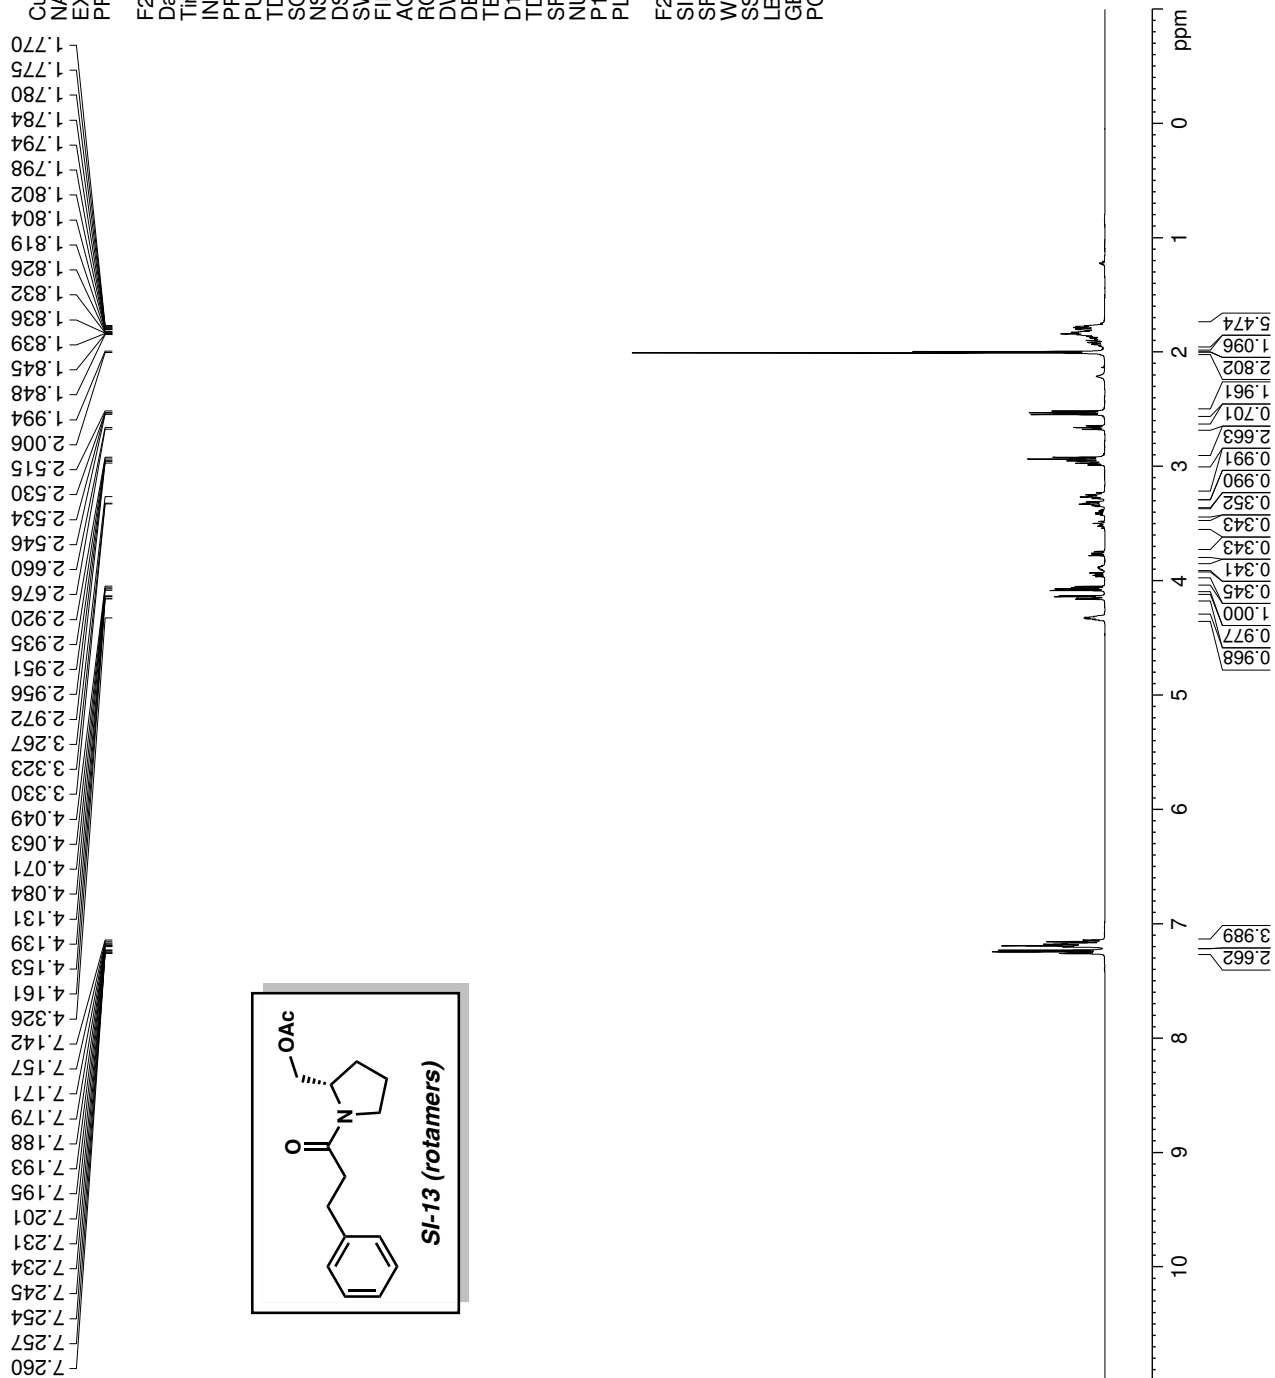

Current Data Parameters  
 NAME BJS-3-093-PLUG  
 EXPNO 1  
 PROCNO 1

F2 - Acquisition Parameters  
 Date\_ 20160407  
 Time 9:21  
 INSTRUM dx500  
 PROBHD 5 mm bb-Z800  
 PULPROG zg30  
 TD 65536  
 SOLVENT CDCl3  
 NS 8  
 DS 0  
 SWH 10000.000 Hz  
 FIDRES 0.152588 Hz  
 AQ 3.2767999 sec  
 RG 203.2  
 DW 50.000 usec  
 DE 6.00 usec  
 TE 297.0 K  
 D1 2.00000000 sec  
 TD0 1

==== CHANNEL f1 =====  
 NUC1 1H  
 P1 13.30 usec  
 PL1 0 dB  
 SFO1 500.3330020 MHz

F2 - Processing parameters  
 SI 32768  
 SF 500.3300221 MHz  
 WDW EM  
 SSB 0  
 LB 0.30 Hz  
 GB 0  
 PC 1.00

3.817

7.356  
7.344  
7.340  
7.331  
7.315  
7.273  
7.268  
7.248  
7.243

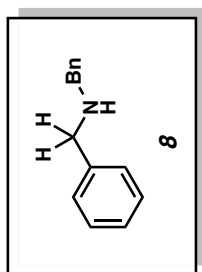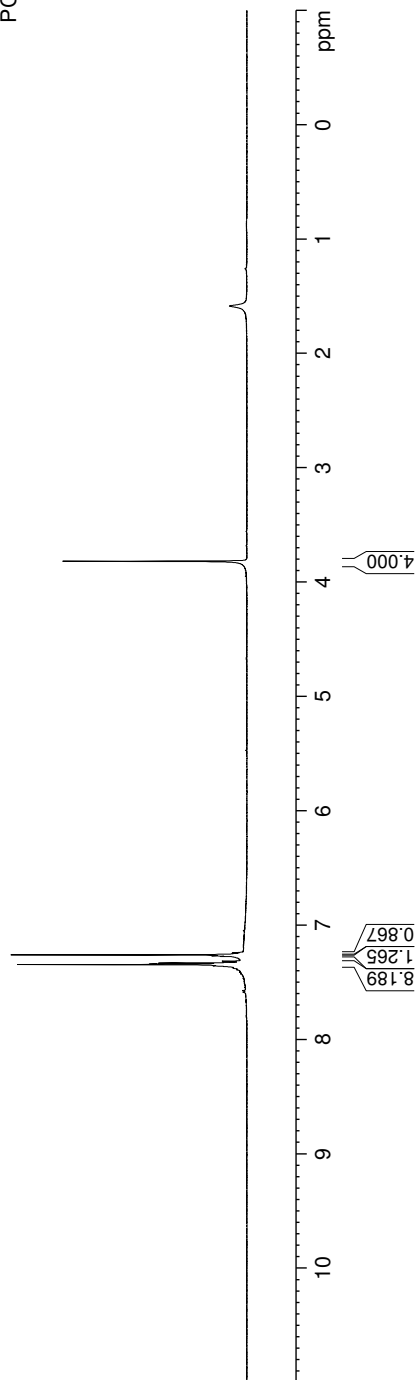

Current Data Parameters  
 NAME BJS-3-098-PLUG2  
 EXPNO 1  
 PROCNO 1

F2 - Acquisition Parameters  
 Date\_ 20160412  
 Time 18.48  
 INSTRUM dx500  
 PROBHD 5 mm bb-Z800  
 PULPROG zg30  
 TD 65536  
 SOLVENT CDCl3  
 NS 8  
 DS 0  
 SWH 10000.000 Hz  
 FIDRES 0.152588 Hz  
 AQ 3.2767999 sec  
 RG 64  
 DW 50.000 usec  
 DE 6.00 usec  
 TE 297.0 K  
 D1 2.00000000 sec  
 TD0 1

==== CHANNEL f1 =====  
 NUC1 1H  
 P1 13.30 usec  
 PL1 0 dB  
 SFO1 500.3330020 MHz

F2 - Processing parameters  
 SI 32768  
 SF 500.3300215 MHz  
 WDW EM  
 SSB 0  
 LB 0.30 Hz  
 GB 0  
 PC 1.00

3.813  
 3.800  
 3.751

7.366  
 7.347  
 7.339  
 7.275  
 7.260  
 6.892  
 6.875

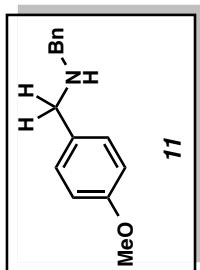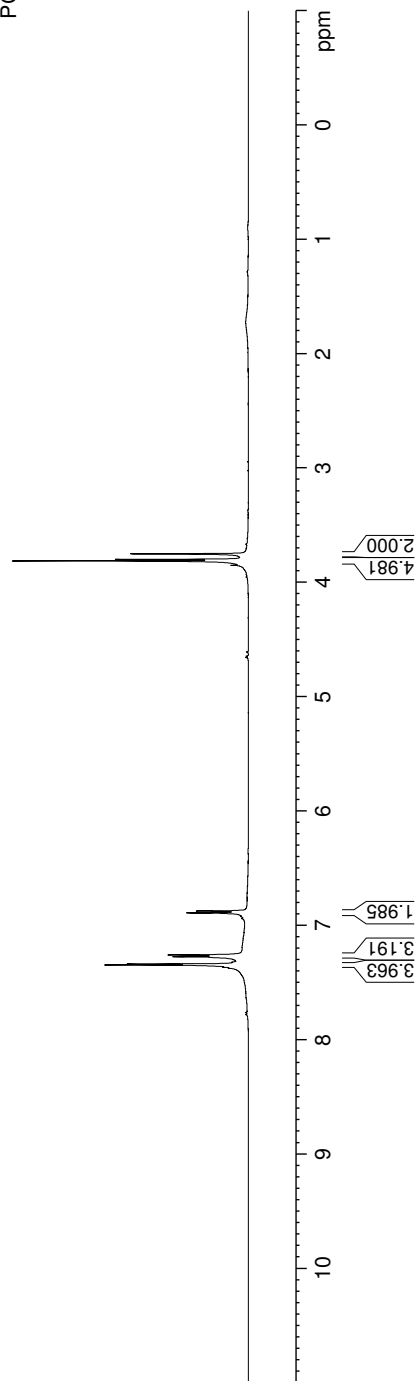

Current Data Parameters  
 NAME BJS-3-096-PURE  
 EXPNO 1  
 PROCNO 1

F2 - Acquisition Parameters  
 Date\_ 20160412  
 Time 18.41  
 INSTRUM dx500  
 PROBHD 5 mm bb-Z800  
 PULPROG zg30  
 TD 65536  
 SOLVENT CDCl3  
 NS 8  
 DS 0  
 SWH 10000.000 Hz  
 FIDRES 0.152588 Hz  
 AQ 3.2767999 sec  
 RG 101.6  
 DW 50.000 usec  
 DE 6.00 usec  
 TE 297.0 K  
 D1 2.00000000 sec  
 TD0 1

==== CHANNEL f1 =====  
 NUC1 1H  
 P1 13.30 usec  
 PL1 0 dB  
 SFO1 500.3330020 MHz

F2 - Processing parameters  
 SI 32768  
 SF 500.3300217 MHz  
 WDW EM  
 SSB 0  
 LB 0.30 Hz  
 GB 0  
 PC 1.00

6.718  
 6.735  
 7.203  
 7.220  
 7.233  
 7.246  
 7.309  
 7.325  
 7.338  
 7.351

2.938

3.802  
 3.722

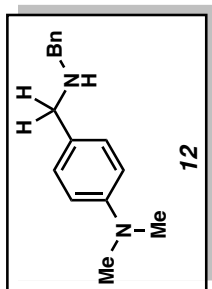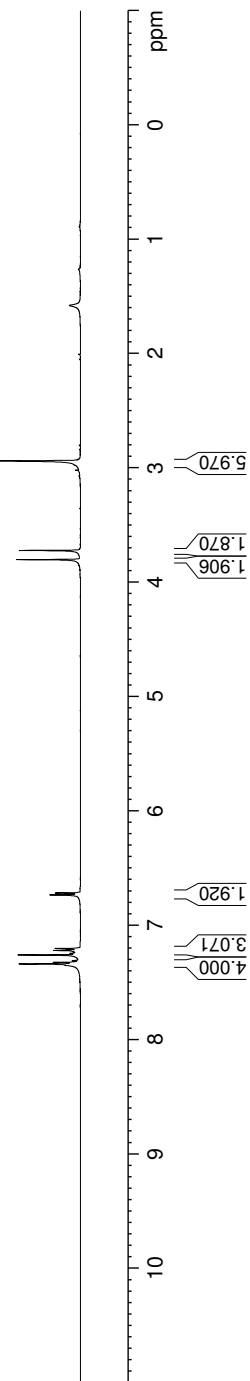

Current Data Parameters  
 NAME BJS-3-117-2  
 EXPNO 1  
 PROCNO 1

F2 - Acquisition Parameters  
 Date\_ 20160429  
 Time 9.48  
 INSTRUM drx500  
 PROBHD 5 mm bb-Z800  
 PULPROG zg30  
 TD 65536  
 SOLVENT CDCl3  
 NS 8  
 DS 0  
 SWH 10000.000 Hz  
 FIDRES 0.152588 Hz  
 AQ 3.2767999 sec  
 RG 101.6  
 DW 50.000 usec  
 DE 6.00 usec  
 TE 297.1 K  
 D1 2.00000000 sec  
 TD0 1

==== CHANNEL f1 =====  
 NUC1 1H  
 P1 13.30 usec  
 PL1 0 dB  
 SFO1 500.3330020 MHz

F2 - Processing parameters  
 SI 32768  
 SF 500.3300215 MHz  
 WDW EM  
 SSB 0  
 LB 0.30 Hz  
 GB 0  
 PC 1.00

4.124  
 3.830  
 3.718

7.336  
 7.328  
 7.288  
 7.280  
 7.262  
 7.260  
 7.120  
 7.104  
 6.657  
 6.640

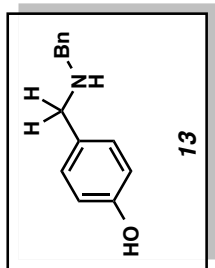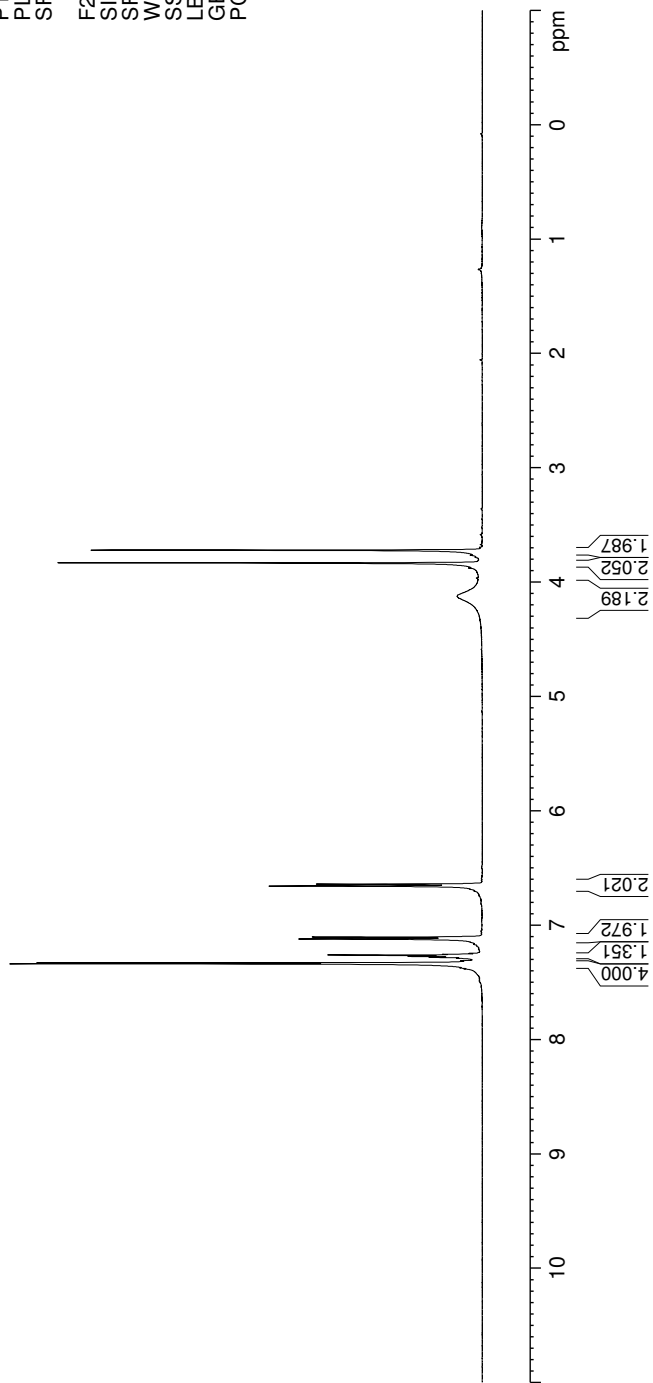

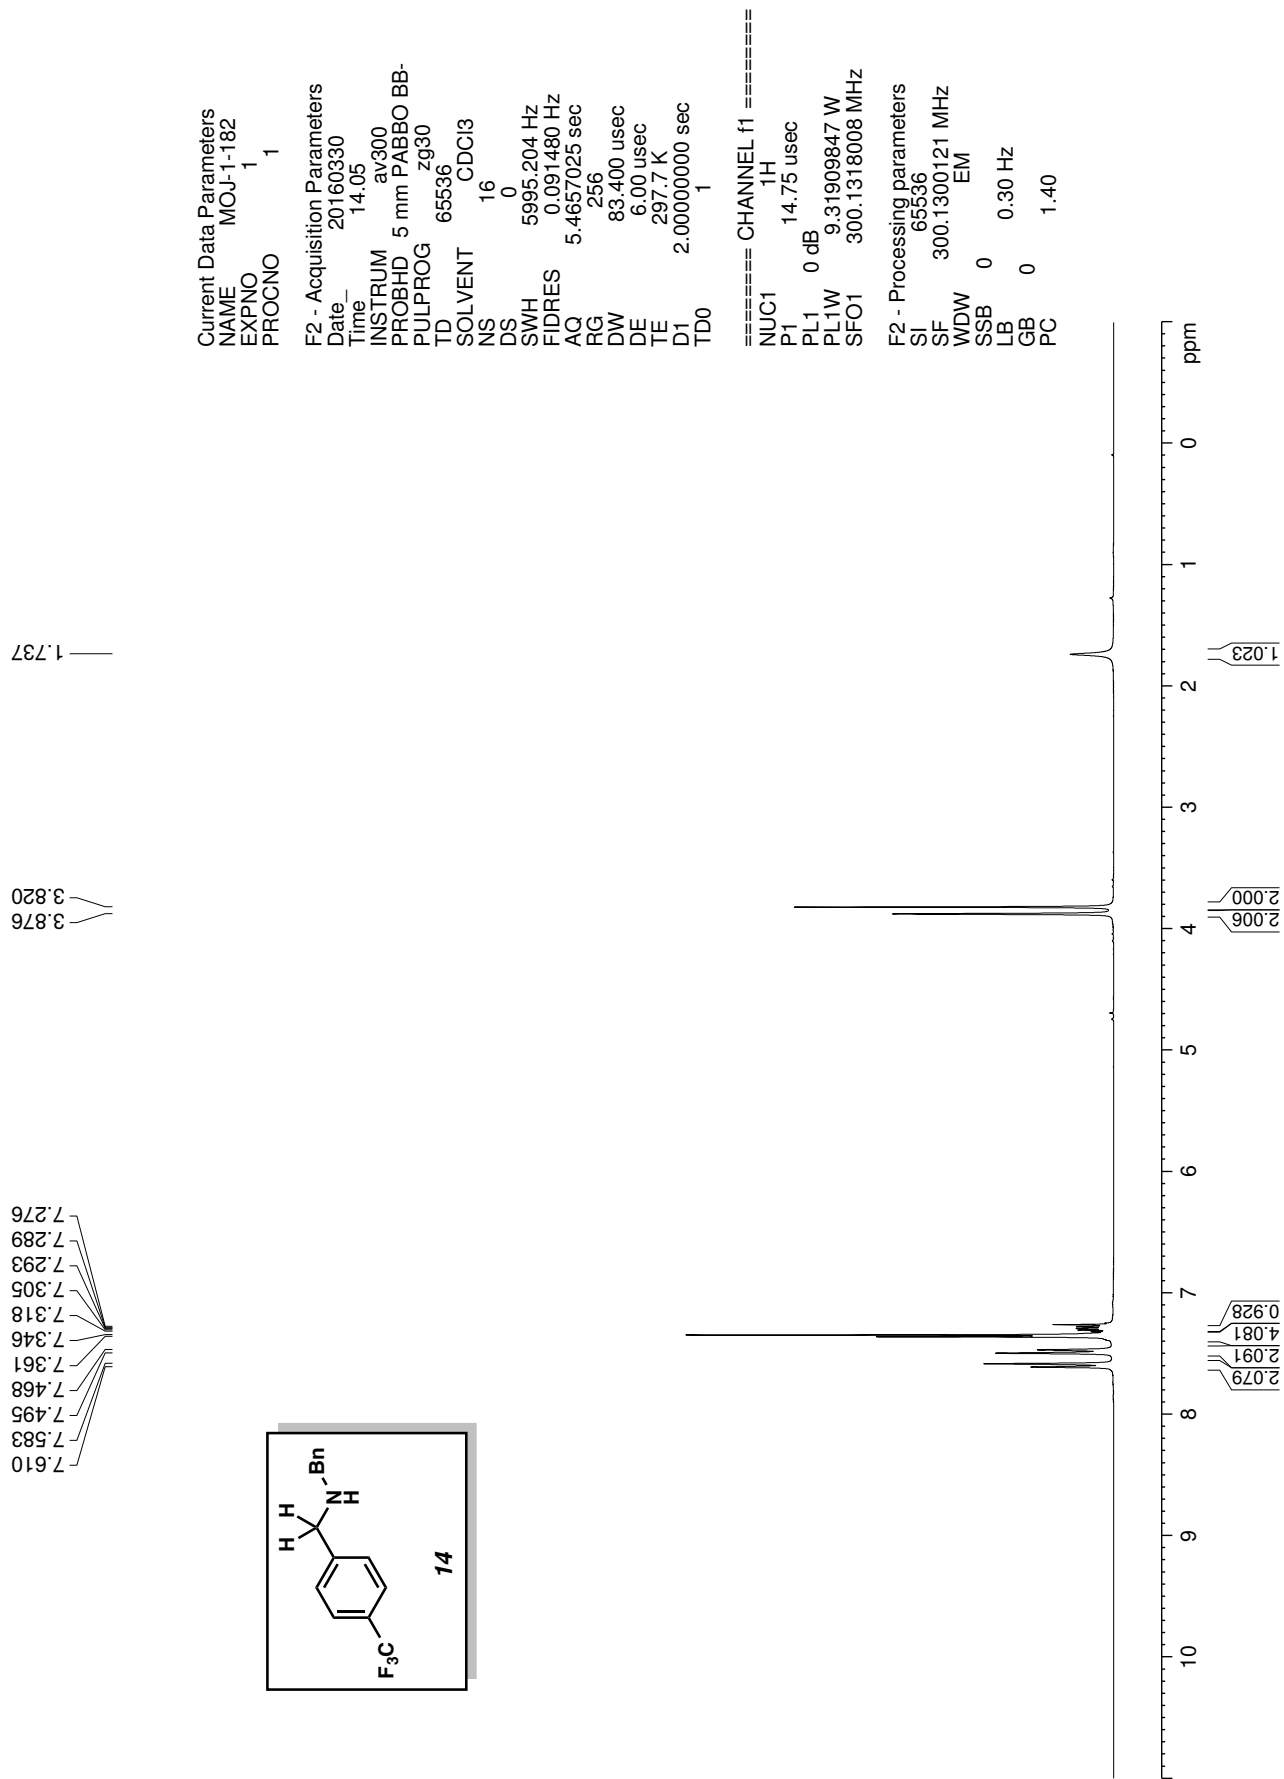



Current Data Parameters  
 NAME MOJ-1-179  
 EXPNO 2  
 PROCNO 1  
 F2 - Acquisition Parameters  
 Date\_ 20160329  
 Time\_ 9.37 h  
 INSTRUM av500  
 PROBHD Z119248\_0002 ( )  
 PULPROG zg30  
 TD 65536  
 SOLVENT CDCl3  
 NS 8  
 DS 0  
 SWH 10000.000 Hz  
 FIDRES 0.305176 Hz  
 AQ 3.2767999 sec  
 RG 12.14  
 DW 50.000 usec  
 DE 10.00 usec  
 TE 298.0 K  
 D1 2.00000000 sec  
 TD0 1  
 SFO1 500.1330008 MHz  
 NUC1 1H  
 P1 10.00 usec  
 PLW1 13.50000000 W  
 F2 - Processing parameters  
 SI 65536  
 SF 500.1300123 MHz  
 WDW EM  
 SSB 0  
 LB 0.30 Hz  
 GB 0  
 PC 1.00

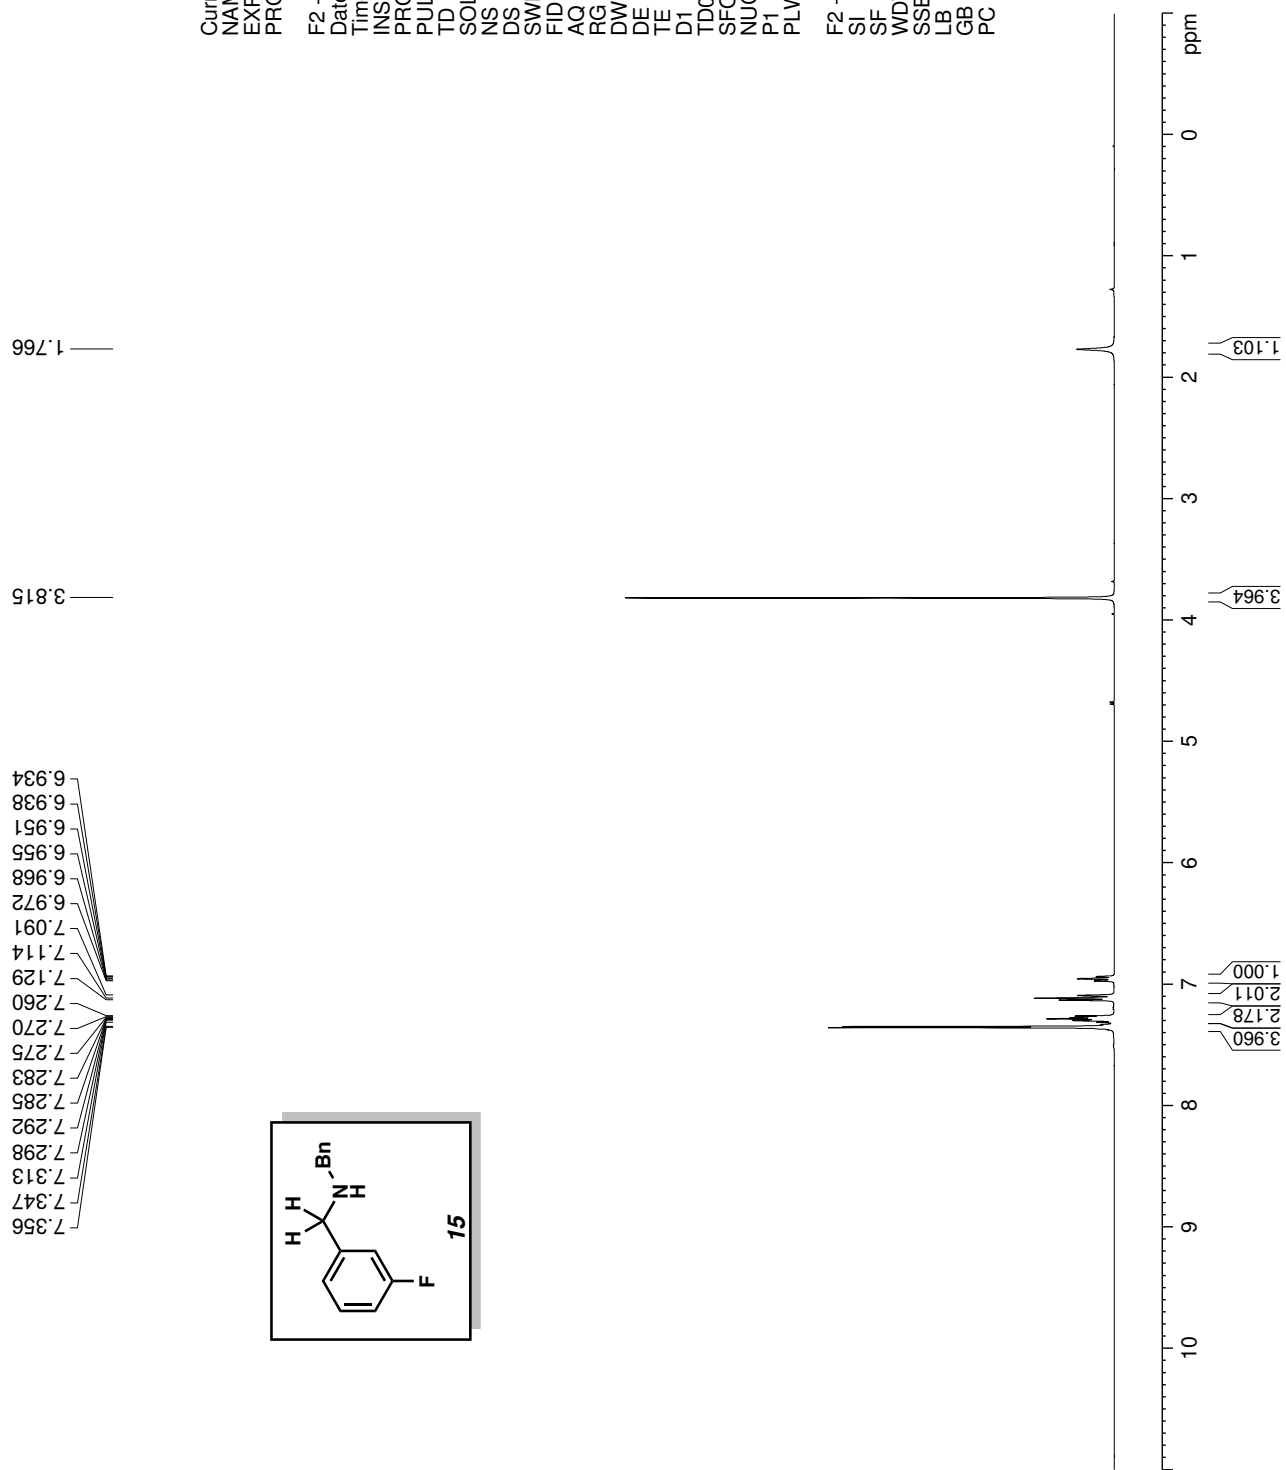

Current Data Parameters  
 NAME BJS-3-144-PREP3  
 EXPNO 1  
 PROCNO 1

F2 - Acquisition Parameters  
 Date\_ 20160518  
 Time 9.06  
 INSTRUM dx500  
 PROBHD 5 mm bb-Z800  
 PULPROG zg30  
 TD 65536  
 SOLVENT CDCl3  
 NS 8  
 DS 0  
 SWH 10000.000 Hz  
 FIDRES 0.152588 Hz  
 AQ 3.2767999 sec  
 RG 101.6  
 DW 50.000 usec  
 DE 6.00 usec  
 TE 300.0 K  
 D1 2.00000000 sec  
 TD0 1

==== CHANNEL f1 =====  
 NUC1 1H  
 P1 13.30 usec  
 PL1 0 dB  
 SFO1 500.3330020 MHz

F2 - Processing parameters  
 SI 32768  
 SF 500.3300219 MHz  
 WDW EM  
 SSB 0  
 LB 0 0.30 Hz  
 GB 0  
 PC 1.00

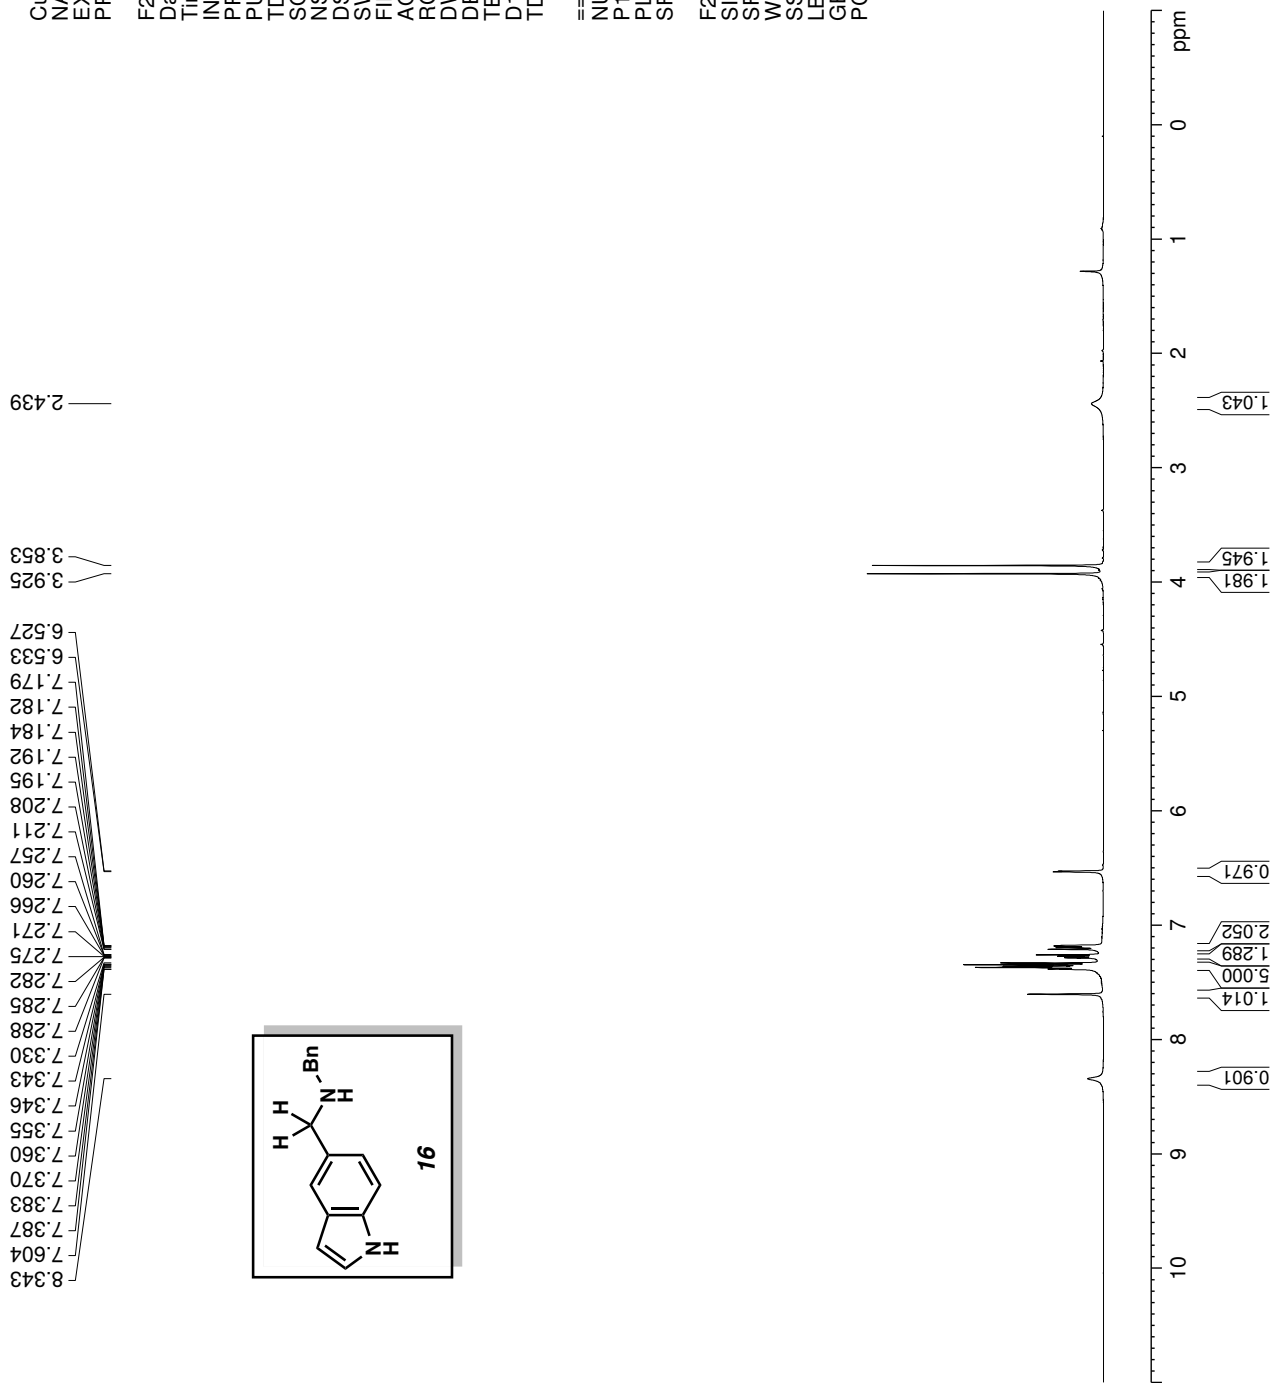

Current Data Parameters  
 NAME BJS-3-PYRAZ-3  
 EXPNO 1  
 PROCNO 1

F2 - Acquisition Parameters  
 Date\_ 20160616  
 Time 9:21  
 INSTRUM dx500  
 PROBHD 5 mm bb-Z800  
 PULPROG zg30  
 TD 65536  
 SOLVENT CDCl3  
 NS 8  
 DS 0  
 SWH 10000.000 Hz  
 FIDRES 0.152588 Hz  
 AQ 3.2767999 sec  
 RG 181  
 DW 50.000 usec  
 DE 6.00 usec  
 TE 297.3 K  
 D1 2.00000000 sec  
 TD0 1

==== CHANNEL f1 =====  
 NUC1 1H  
 P1 13.30 usec  
 PL1 0 dB  
 SFO1 500.3330020 MHz

F2 - Processing parameters  
 SI 32768  
 SF 500.3300221 MHz  
 WDW EM  
 SSB 0  
 LB 0.30 Hz  
 GB 0  
 PC 1.00

3.873  
 3.810  
 3.686

7.426  
 7.347  
 7.331  
 7.329  
 7.322  
 7.312  
 7.306  
 7.280  
 7.271  
 7.260  
 7.253  
 7.248  
 7.243  
 7.236

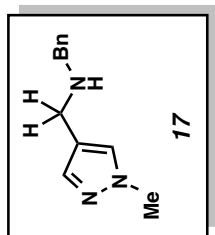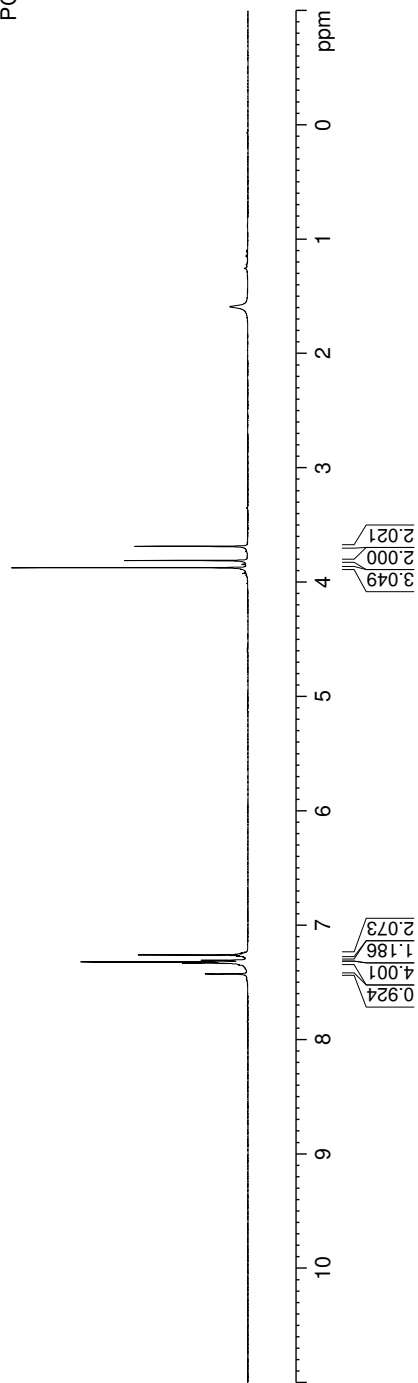

3.049  
 2.000  
 2.021

0.924  
 4.001  
 1.186  
 2.073

Current Data Parameters  
 NAME BJS-3-141-COLUMN  
 EXPNO 1  
 PROCNO 1

F2 - Acquisition Parameters

Date\_ 20160515  
 Time 9.16 h  
 INSTRUM av500  
 PROBHD Z119248\_0002 (  
 PULPROG zg30  
 TD 65536  
 SOLVENT CDCl3  
 NS 8  
 DS 0  
 SWH 10000.000 Hz  
 FIDRES 0.305176 Hz  
 AQ 3.2767999 sec  
 RG 12.14  
 DW 50.000 usec  
 DE 10.00 usec  
 TE 298.0 K  
 D1 2.00000000 sec  
 TD0 1  
 SFO1 500.1330008 MHz  
 NUC1 1H  
 P1 10.00 usec  
 PLW1 13.50000000 W

F2 - Processing parameters

SI 65536  
 SF 500.1300122 MHz  
 WDW EM  
 SSB 0  
 LB 0  
 GB 0  
 PC 1.00

7.350  
 7.344  
 7.340  
 7.339  
 7.293  
 7.287  
 7.284  
 7.278  
 7.277  
 7.273  
 7.271  
 7.266  
 7.256  
 7.237  
 7.235  
 7.227  
 7.225  
 6.974  
 6.967  
 6.964  
 6.957  
 6.942  
 6.940  
 6.938  
 6.935  
 6.933  
 4.008  
 4.006  
 3.847  
 1.795

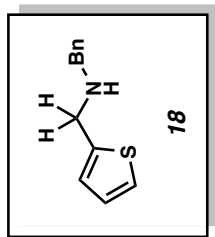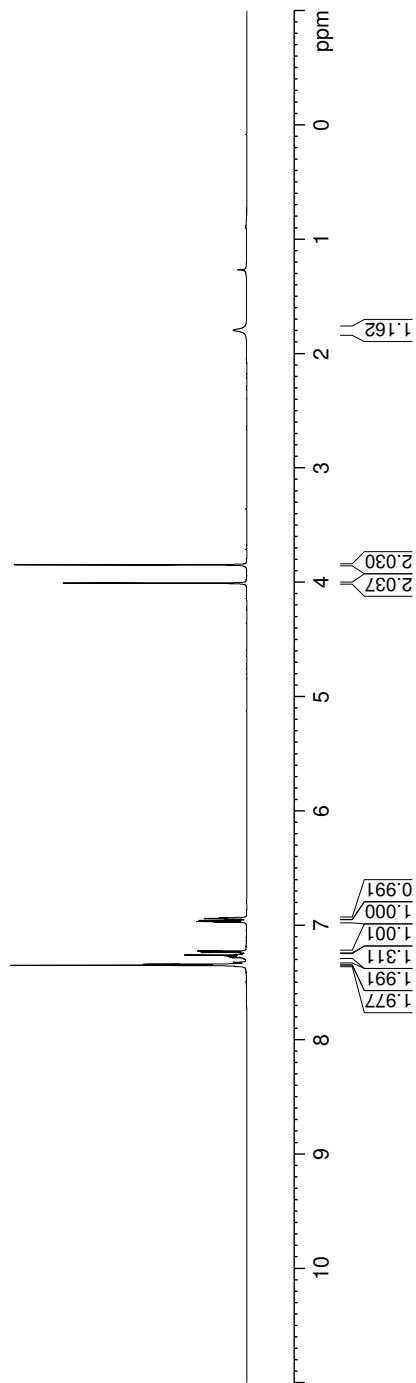

Current Data Parameters  
 NAME BJS-3-139-COLUMN;  
 EXPNO 1  
 PROCNO 1

F2 - Acquisition Parameters  
 Date\_ 20160512  
 Time 9.52  
 INSTRUM dx500  
 PROBHD 5 mm bb-Z800  
 PULPROG zg30  
 TD 65536  
 SOLVENT CDCl3  
 NS 8  
 DS 0  
 SWH 10000.000 Hz  
 FIDRES 0.152588 Hz  
 AQ 3.2767999 sec  
 RG 80.6  
 DW 50.000 usec  
 DE 6.00 usec  
 TE 297.0 K  
 D1 2.00000000 sec  
 TD0 1

==== CHANNEL f1 =====  
 NUC1 1H  
 P1 13.30 usec  
 PL1 0 dB  
 SFO1 500.3330020 MHz

F2 - Processing parameters  
 SI 32768  
 SF 500.3300222 MHz  
 WDW EM  
 SSB 0  
 LB 0.30 Hz  
 GB 0  
 PC 1.00

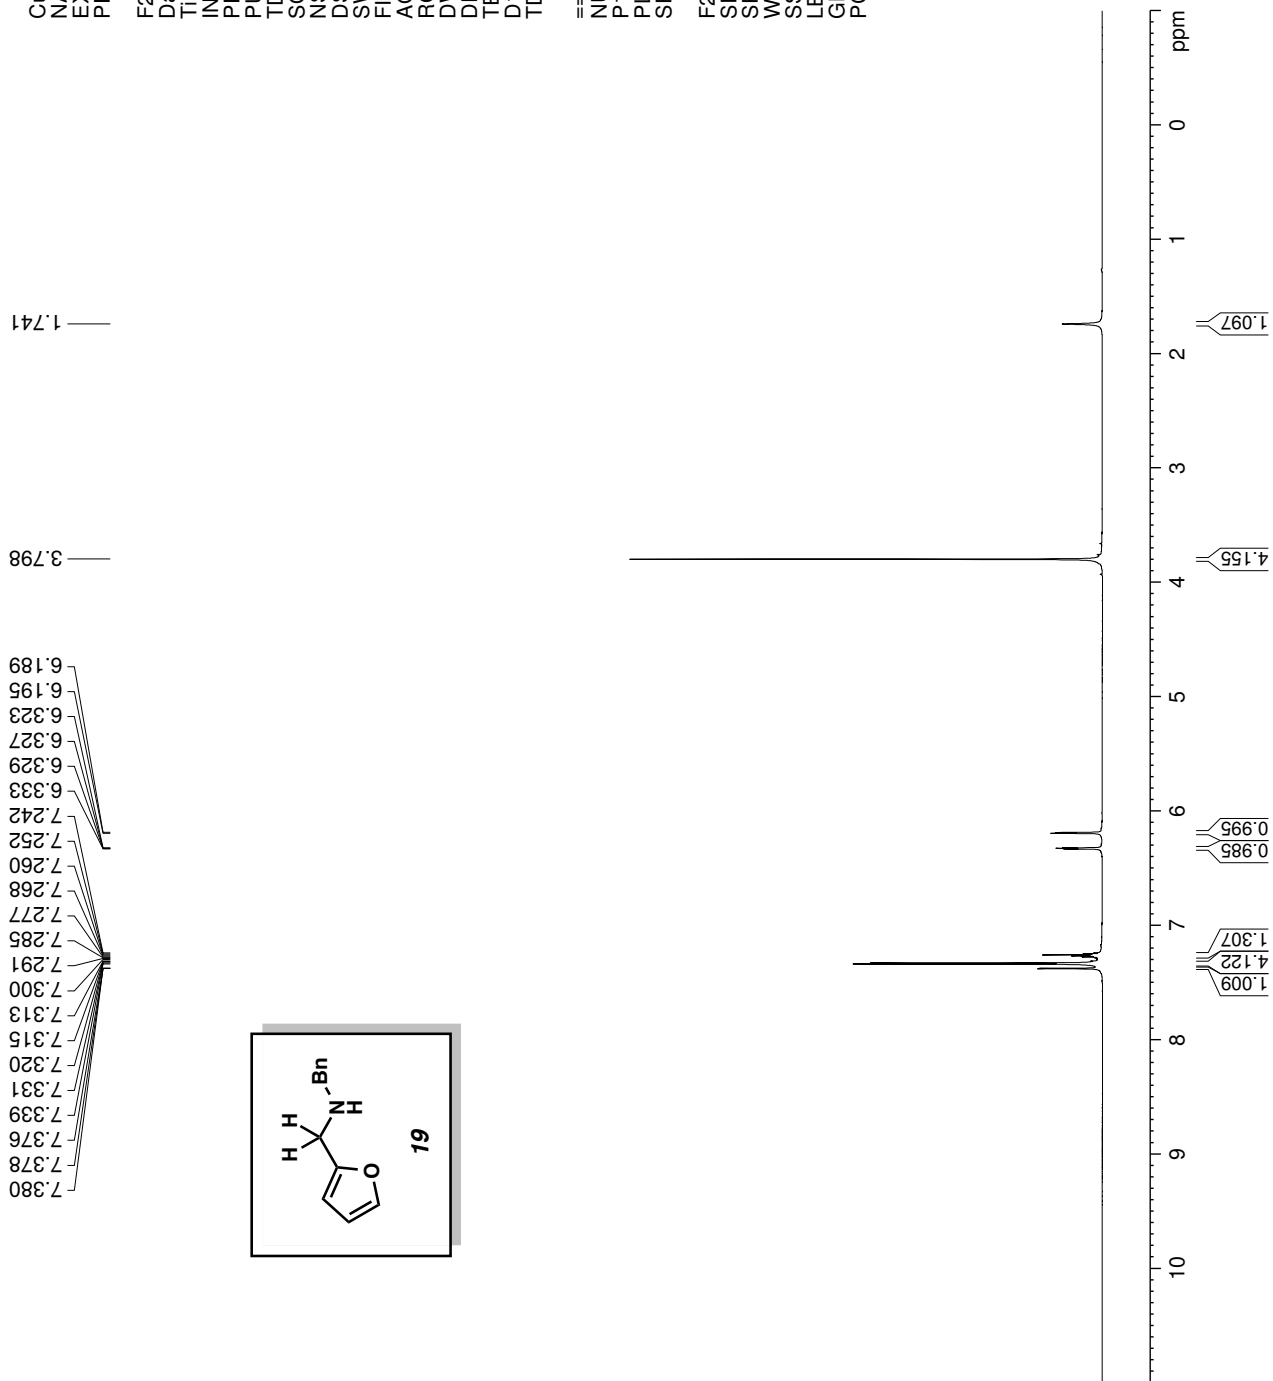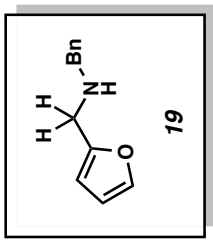

Current Data Parameters  
 NAME BJS-3-109-COLUMN  
 EXPNO 1  
 PROCNO 1

F2 - Acquisition Parameters

Date\_ 20160422  
 Time 8.55 h  
 INSTRUM av500  
 PROBHD Z119248\_0002 (  
 PULPROG zg30  
 TD 65536  
 SOLVENT CDCl3  
 NS 8  
 DS 0  
 SWH 10000.000 Hz  
 FIDRES 0.305176 Hz  
 AQ 3.2767999 sec  
 RG 12.14  
 DW 50.000 usec  
 DE 10.00 usec  
 TE 298.0 K  
 D1 2.00000000 sec  
 TD0 1  
 SFO1 500.1330008 MHz  
 NUC1 1H  
 P1 10.00 usec  
 PLW1 13.50000000 W

F2 - Processing parameters

SI 65536  
 SF 500.1300122 MHz  
 WDW EM  
 SSB 0  
 LB 0.30 Hz  
 GB 0  
 PC 1.00

2.640  
 2.626  
 2.611  
 1.538  
 1.523  
 1.509  
 1.495  
 1.480  
 1.327  
 1.313  
 1.299  
 1.289  
 1.262  
 0.897  
 0.884  
 0.869

7.327  
 7.318  
 7.260  
 7.256  
 7.255  
 7.246  
 7.240  
 7.237

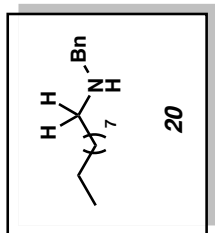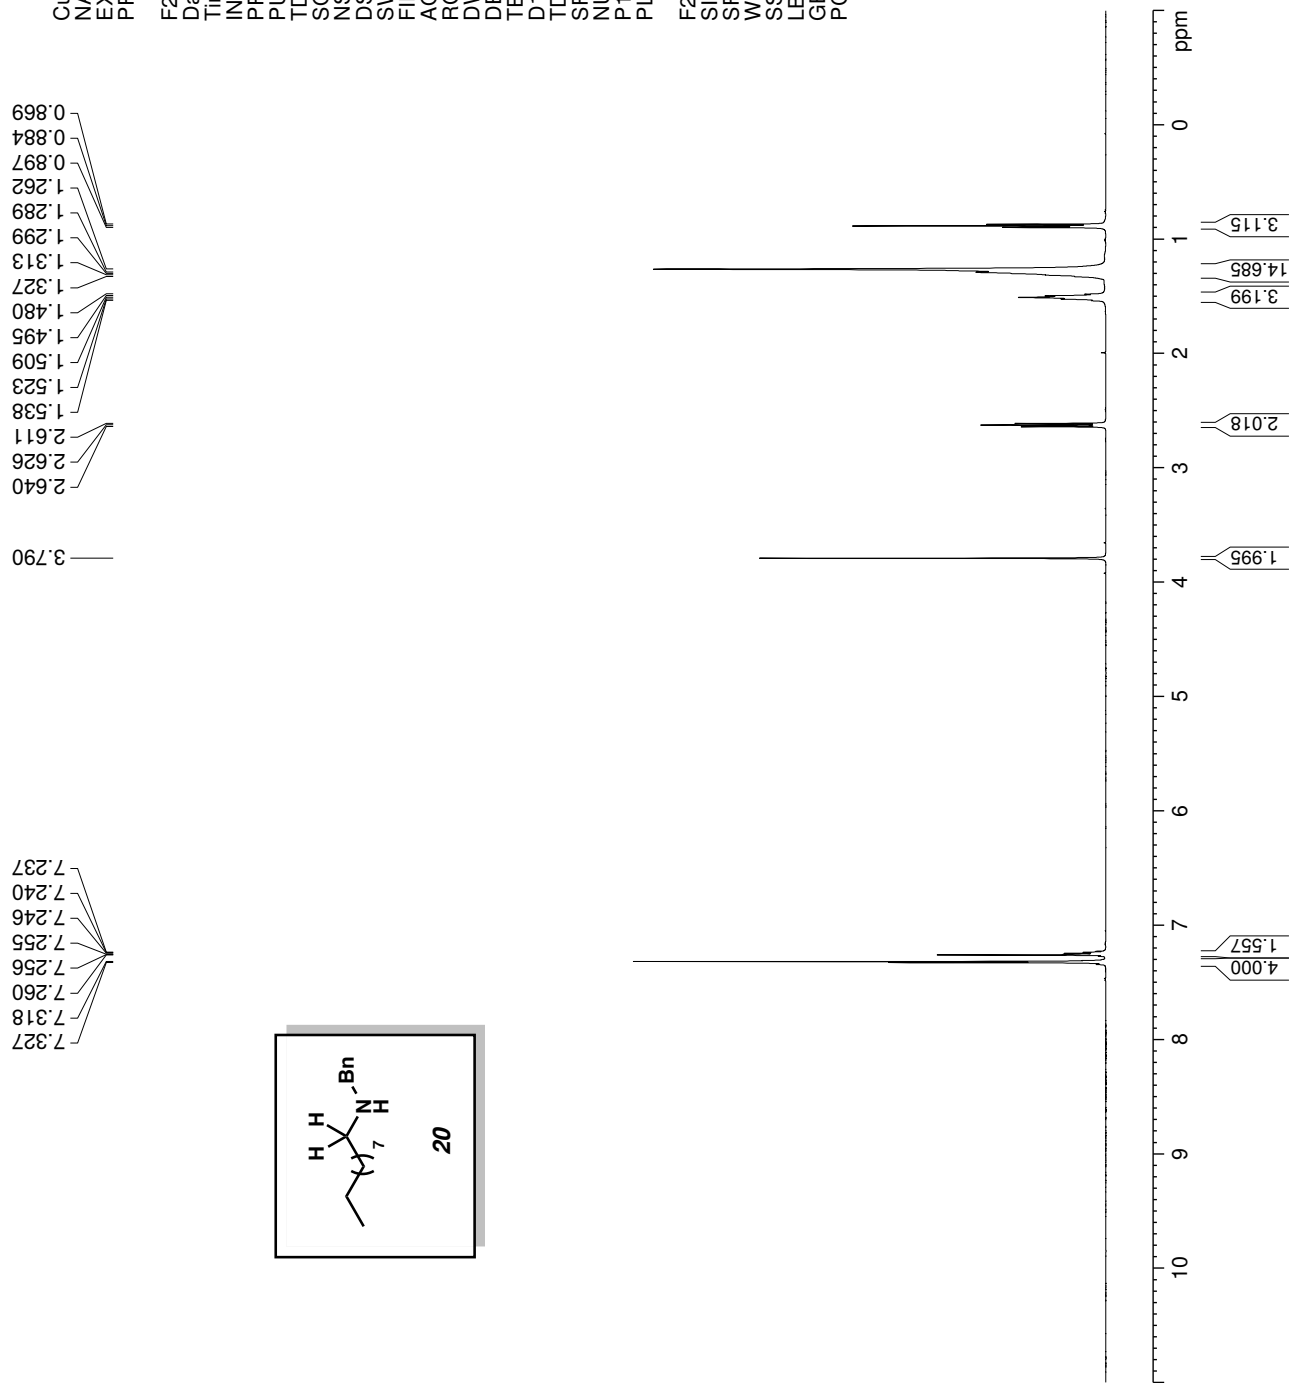

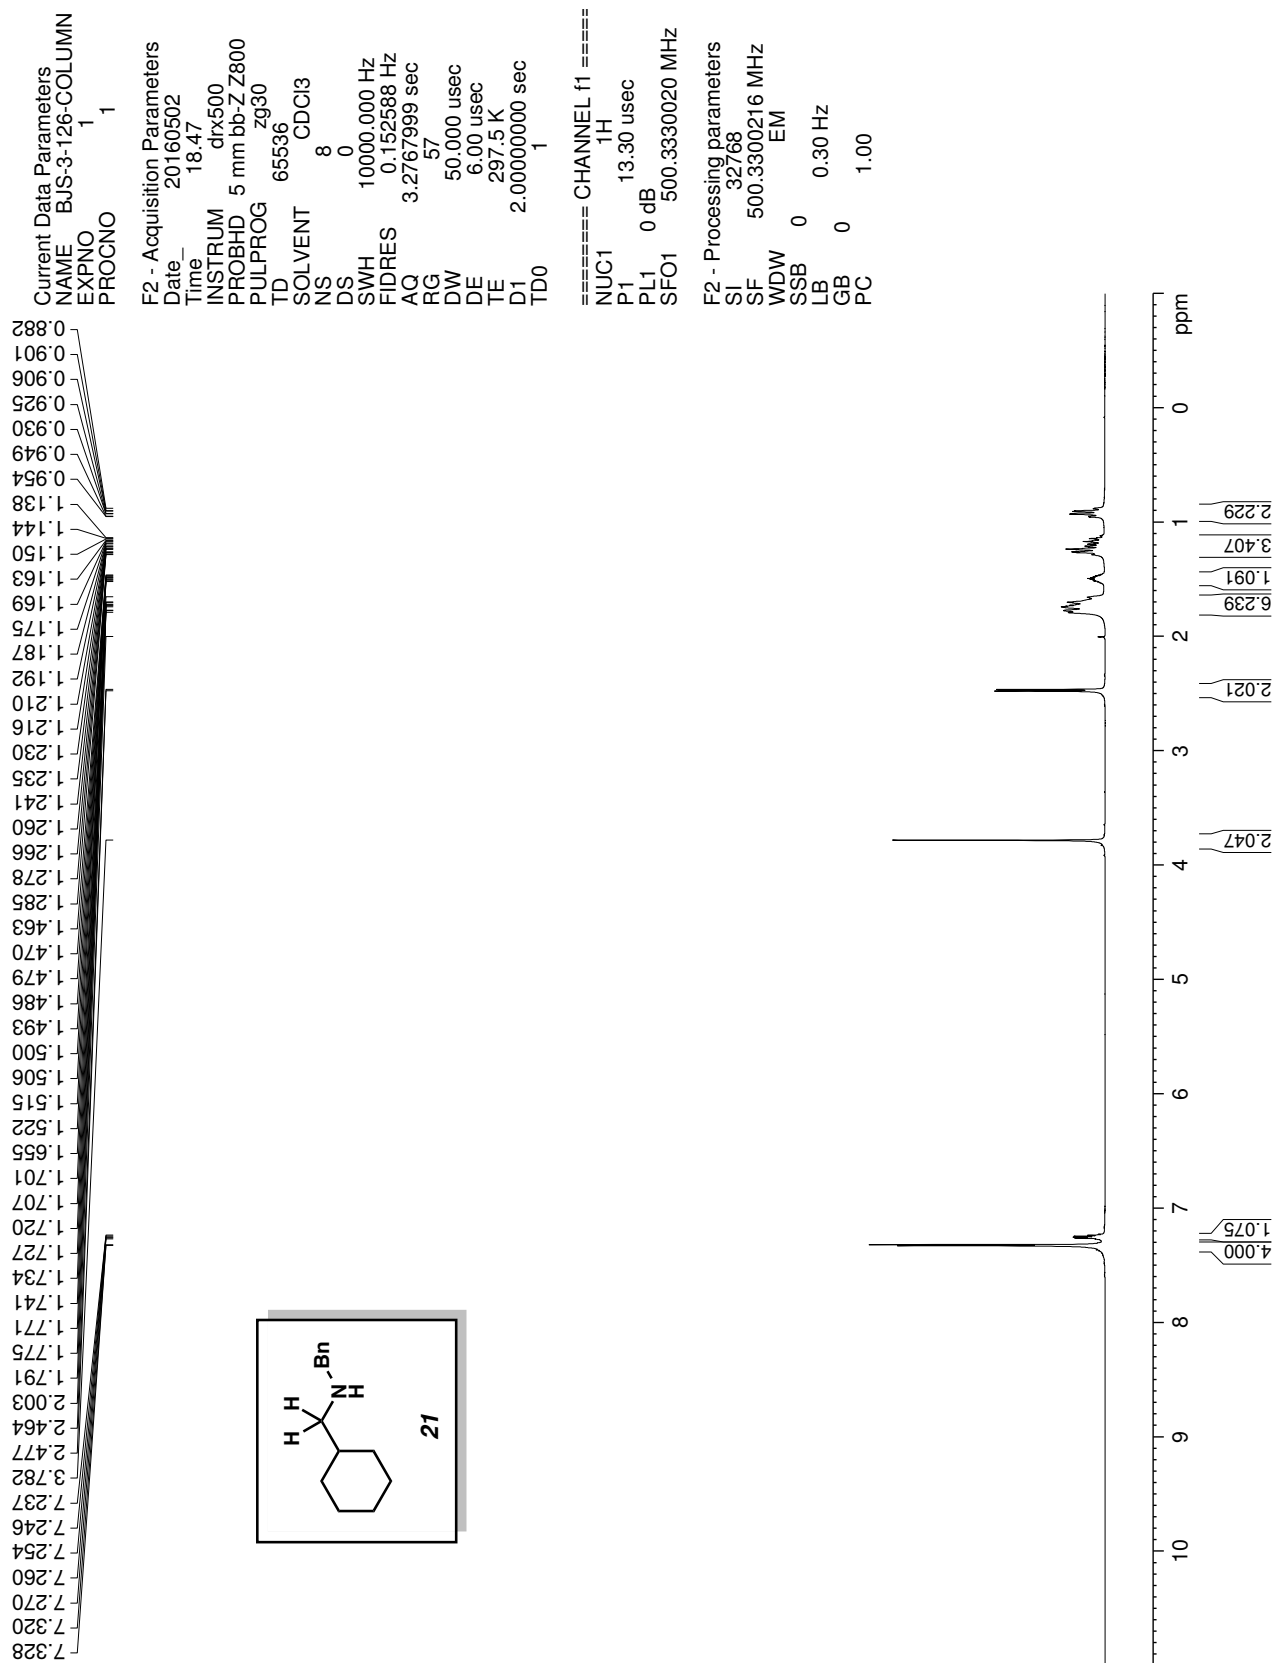

Current Data Parameters  
 NAME BJS-3-105-COLUMN  
 EXPNO 1  
 PROCNO 1

F2 - Acquisition Parameters  
 Date\_ 20160420  
 Time 9.14 h  
 INSTRUM av500  
 PROBHD Z119248\_0002 (  
 PULPROG zg30  
 TD 65536  
 SOLVENT CDCl3  
 NS 8  
 DS 0  
 SWH 10000.000 Hz  
 FIDRES 0.305176 Hz  
 AQ 3.2767999 sec  
 RG 12.14  
 DW 50.000 usec  
 DE 10.00 usec  
 TE 298.0 K  
 D1 2.00000000 sec  
 TD0 1  
 SFO1 500.1330008 MHz  
 NUC1 1H  
 P1 10.00 usec  
 PLW1 13.50000000 W

F2 - Processing parameters  
 SI 65536  
 SF 500.1300122 MHz  
 WDW EM  
 SSB 0  
 LB 0.30 Hz  
 GB 0  
 PC 1.00

2.264  
 1.973  
 1.739  
 1.715  
 1.665  
 1.641  
 1.542

3.797

7.336  
 7.328  
 7.260  
 7.249  
 7.240

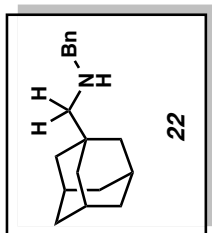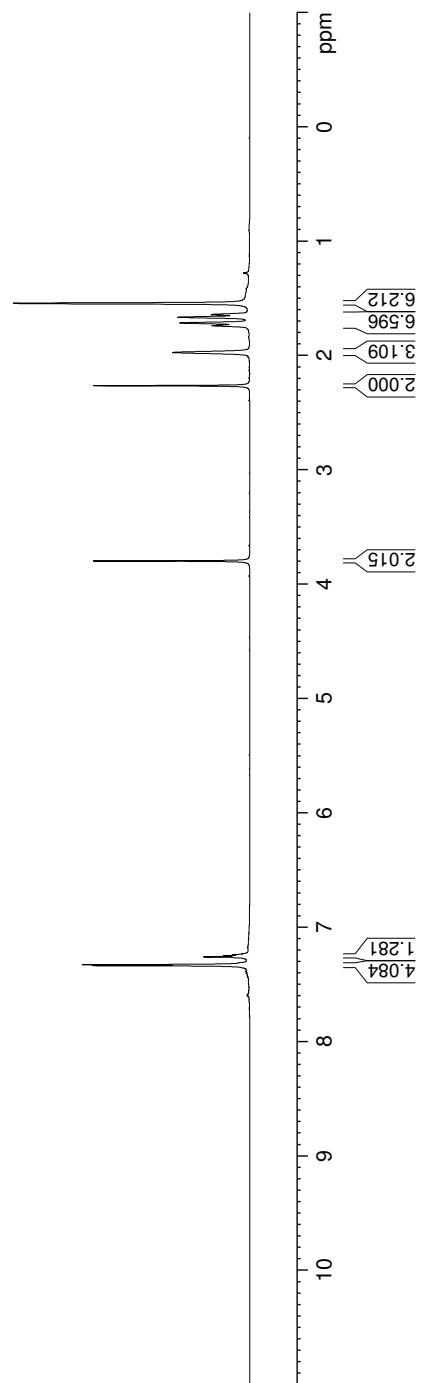



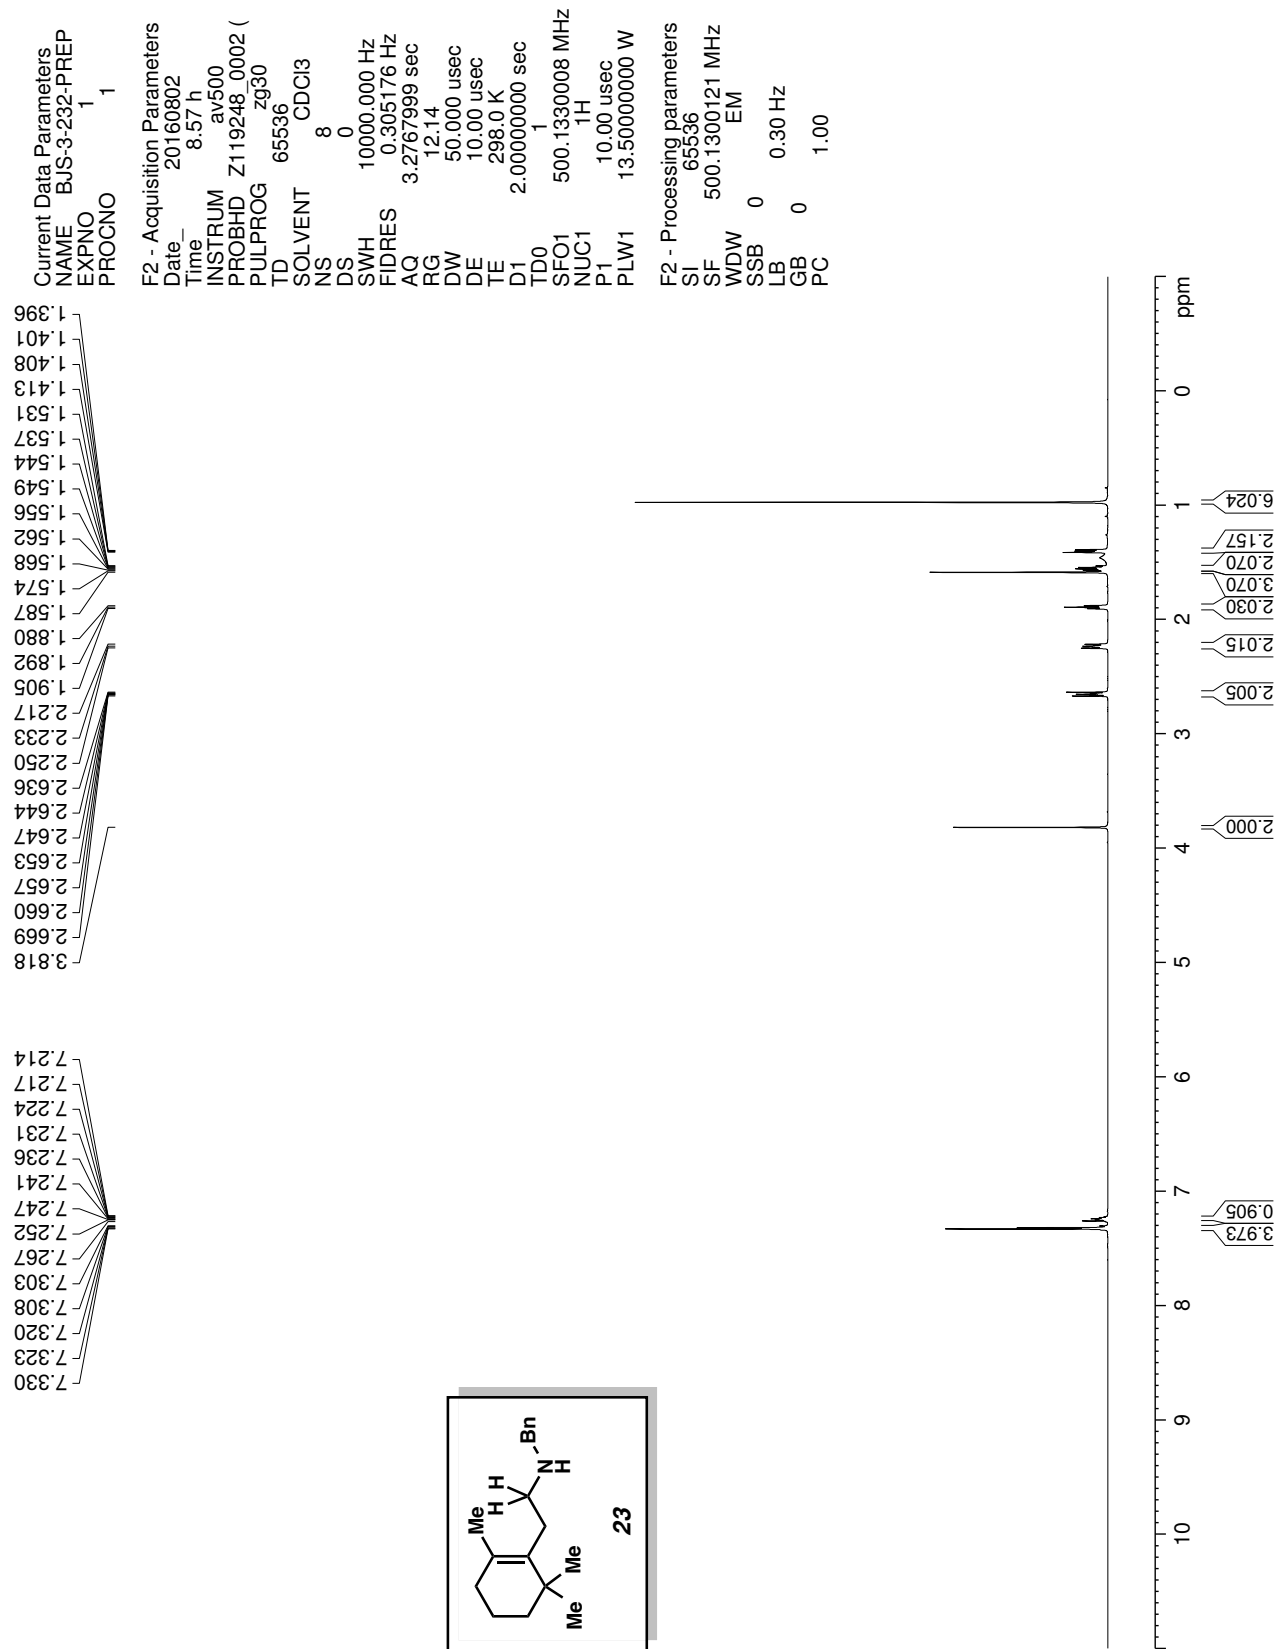

Current Data Parameters  
 NAME BJS-3-147-COLUMN  
 EXPNO 1  
 PROCNO 1

F2 - Acquisition Parameters  
 Date\_ 20160518  
 Time 17:59  
 INSTRUM drx500  
 PROBHD 5 mm bb-Z800  
 PULPROG zg30  
 TD 65536  
 SOLVENT CDCl3  
 NS 8  
 DS 0  
 SWH 10000.000 Hz  
 FIDRES 0.152588 Hz  
 AQ 3.2767999 sec  
 RG 57  
 DW 50.000 usec  
 DE 6.00 usec  
 TE 297.2 K  
 D1 2.00000000 sec  
 TD0 1

==== CHANNEL f1 =====  
 NUC1 1H  
 P1 13.30 usec  
 PL1 0 dB  
 SFO1 500.3330020 MHz

F2 - Processing parameters  
 SI 32768  
 SF 500.3300221 MHz  
 WDW EM  
 SSB 0  
 LB 0 0.30 Hz  
 GB 0  
 PC 1.00

7.357  
7.348  
7.304  
7.296  
7.288  
7.279  
7.270  
6.906  
6.897  
6.892  
6.887  
6.879  
6.873  
6.868  
6.860  
6.858  
6.854  
6.850  
6.845  
6.840  
4.330  
4.326  
4.321  
4.316  
4.312  
4.306  
4.302  
4.297  
4.290  
4.268  
4.264  
4.070  
4.055  
4.047  
4.032  
3.870  
2.955  
2.942  
2.930  
2.917  
2.903  
2.894  
2.878  
2.869  
2.002

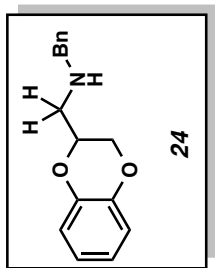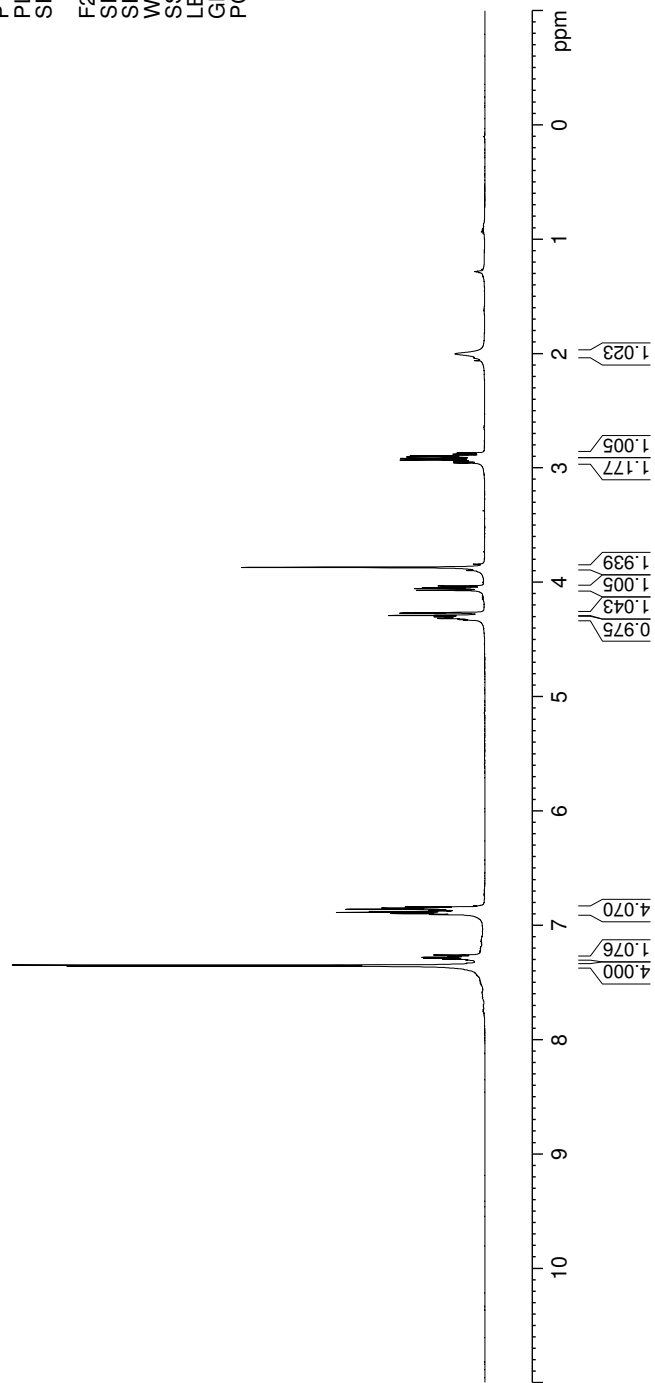

Current Data Parameters  
 NAME BJS-3-119-COLUMN  
 EXPNO 1  
 PROCNO 1

F2 - Acquisition Parameters  
 Date\_ 20160501  
 Time 9:22  
 INSTRUM drx500  
 PROBHD 5 mm bb-Z800  
 PULPROG zg30  
 TD 65536  
 SOLVENT CDCl3  
 NS 8  
 DS 0  
 SWH 10000.000 Hz  
 FIDRES 0.152588 Hz  
 AQ 3.2767999 sec  
 RG 57  
 DW 50.000 usec  
 DE 6.00 usec  
 TE 297.3 K  
 D1 2.00000000 sec  
 TD0 1

==== CHANNEL f1 =====  
 NUC1 1H  
 P1 13.30 usec  
 PL1 0 dB  
 SFO1 500.3330020 MHz

F2 - Processing parameters  
 SI 32768  
 SF 500.3300220 MHz  
 WDW EM  
 SSB 0  
 LB 0 0.30 Hz  
 GB 0  
 PC 1.00

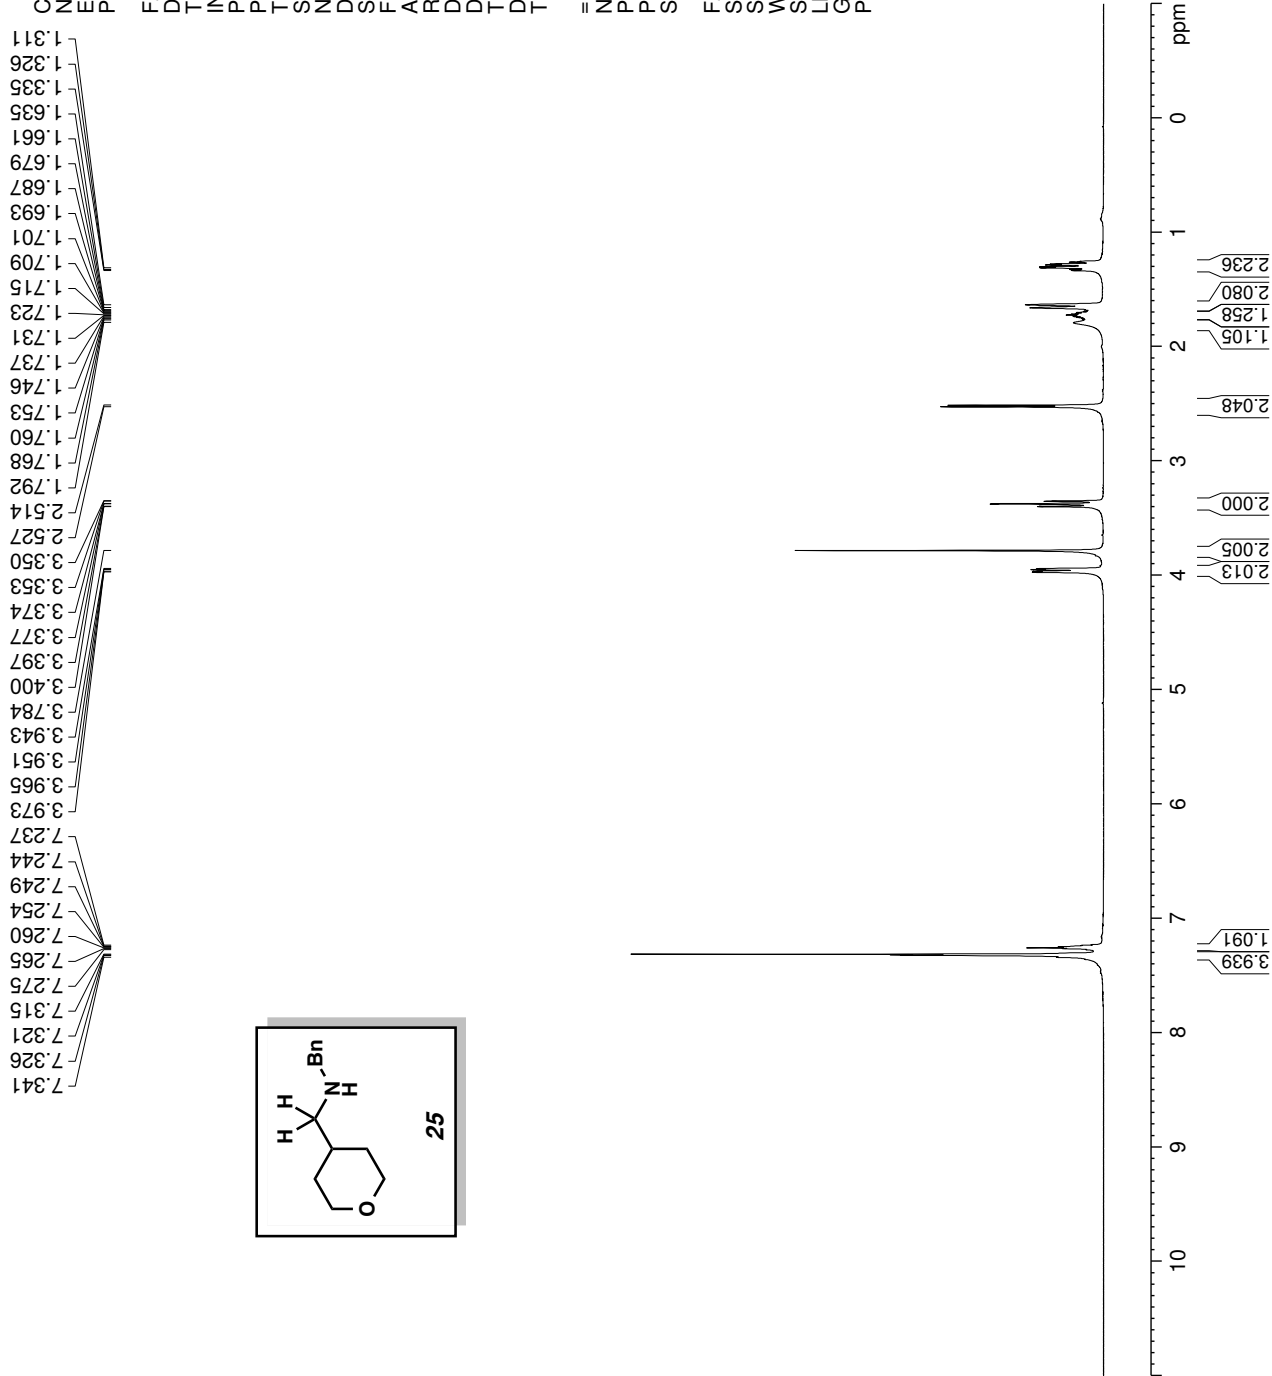

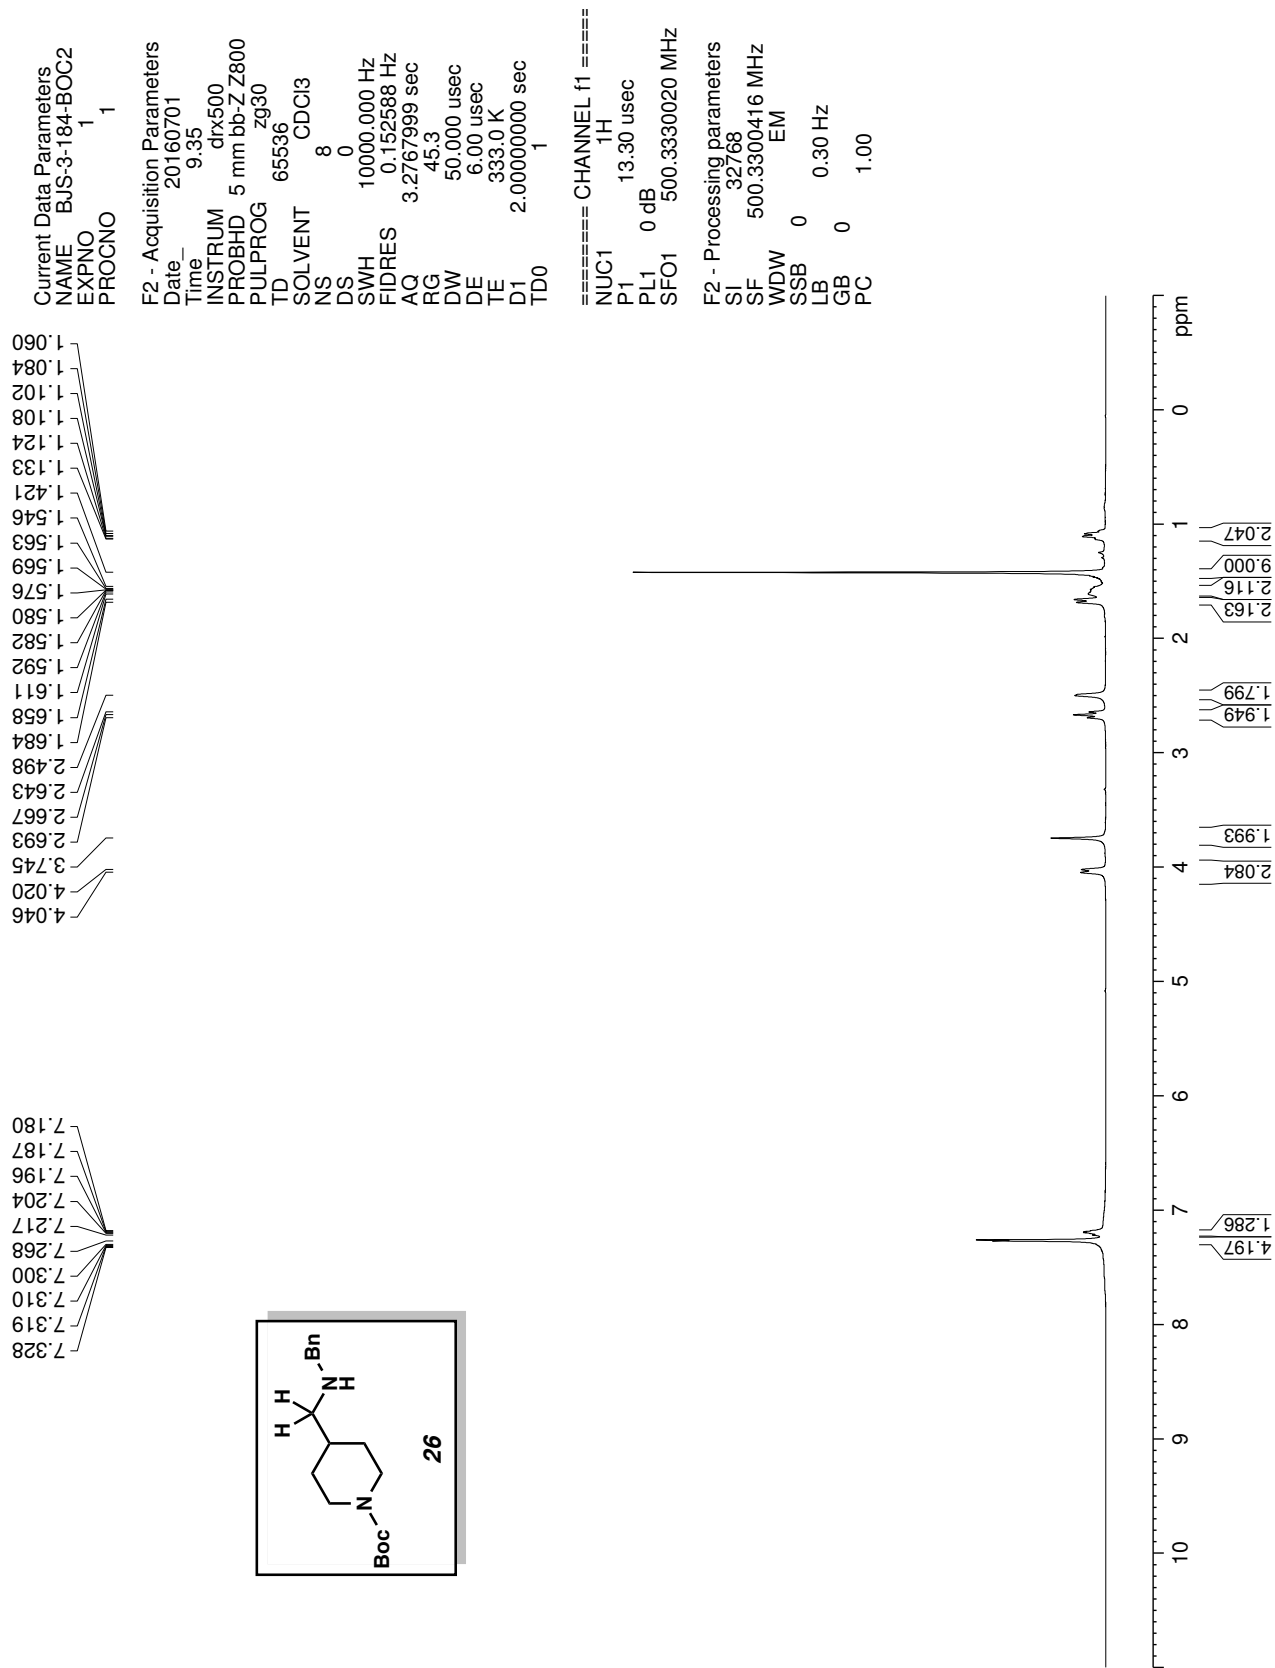

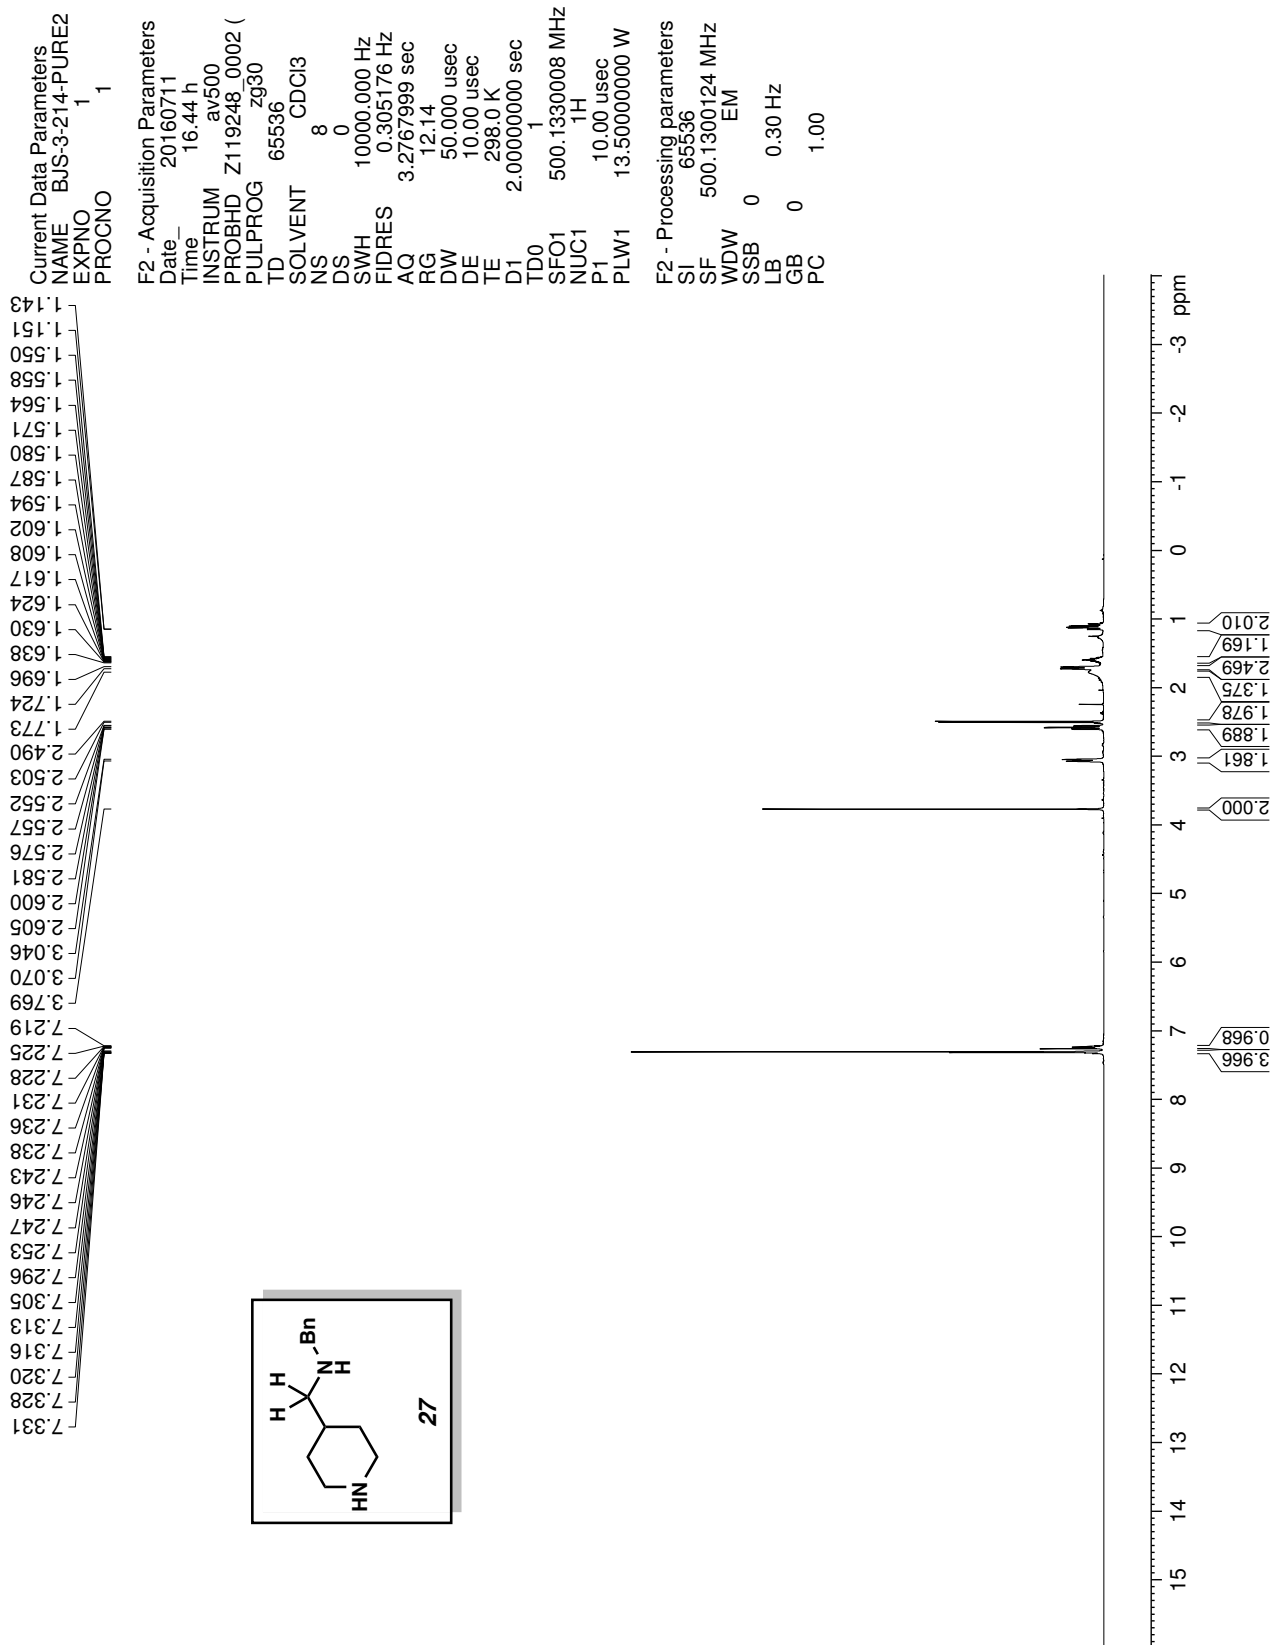

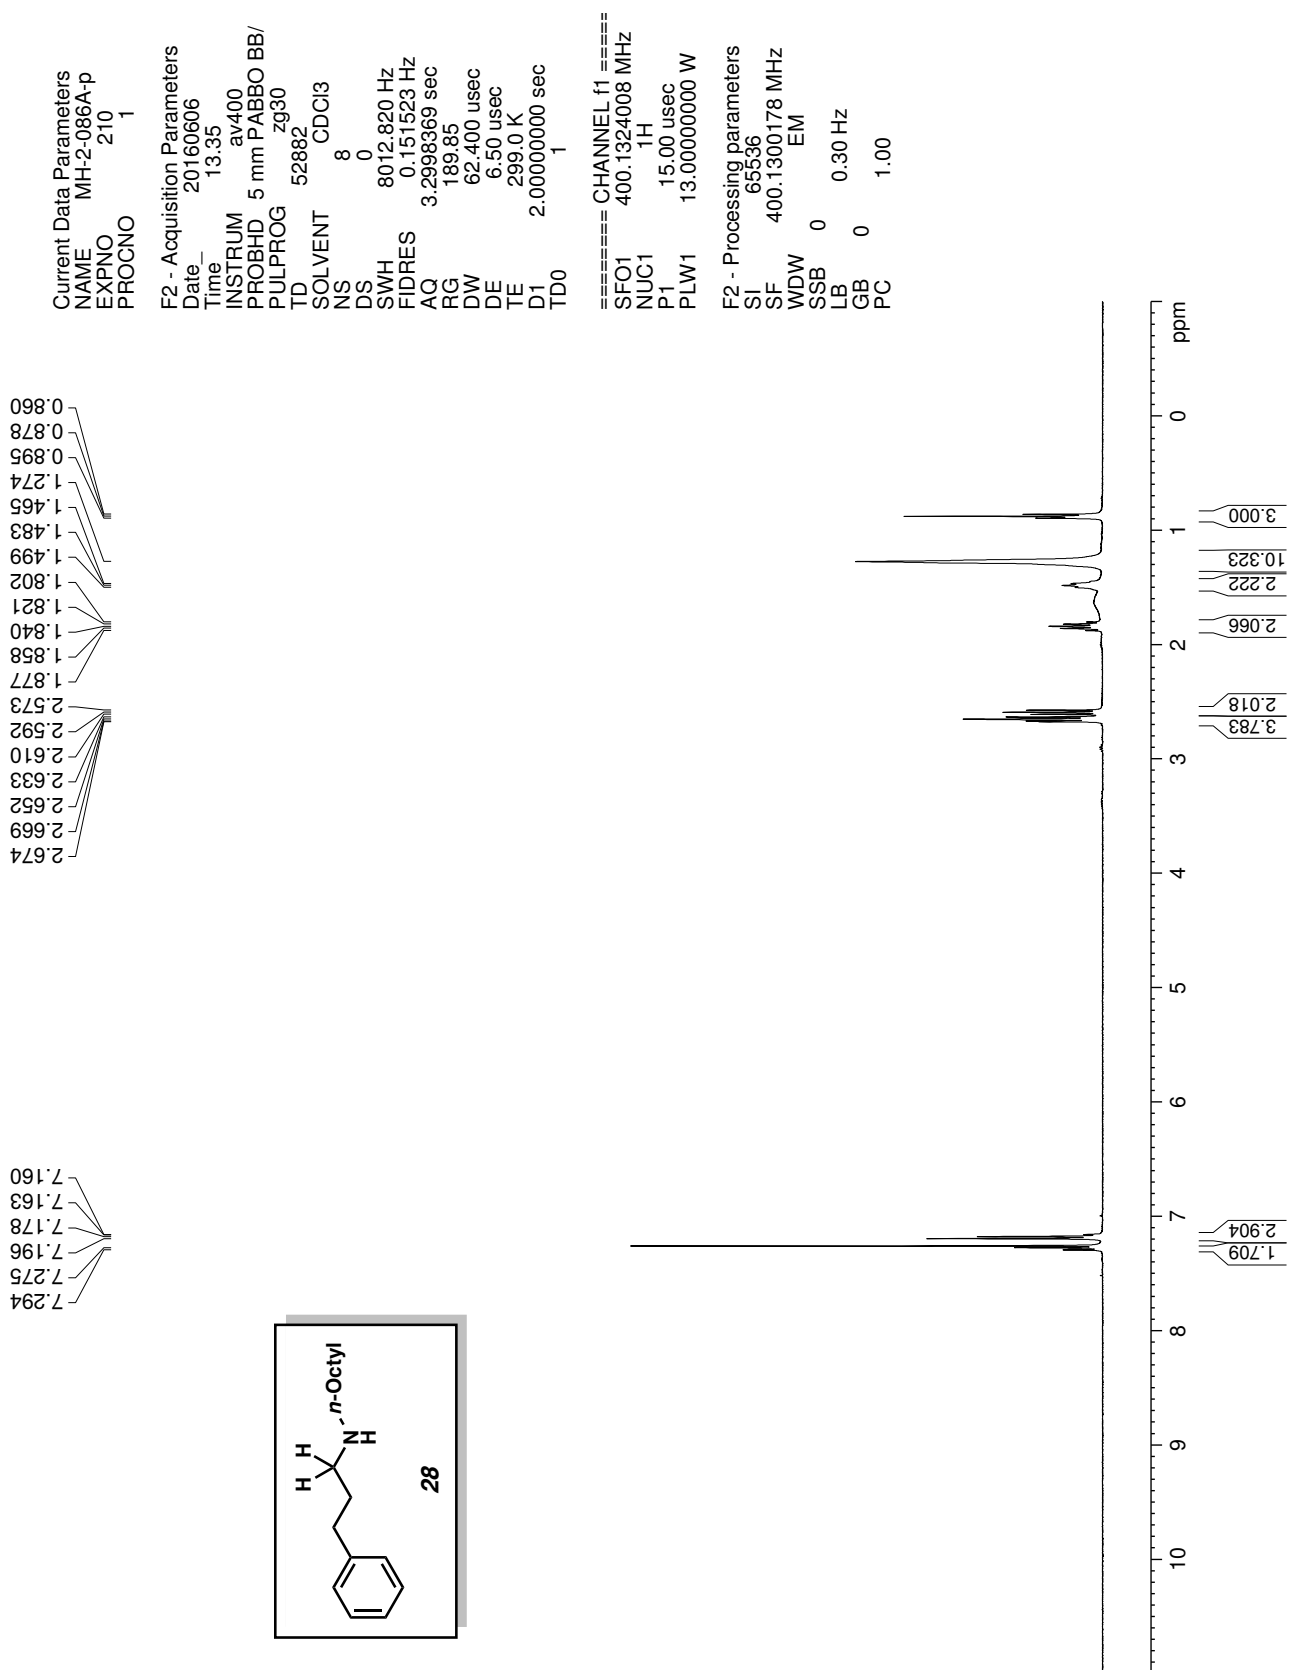

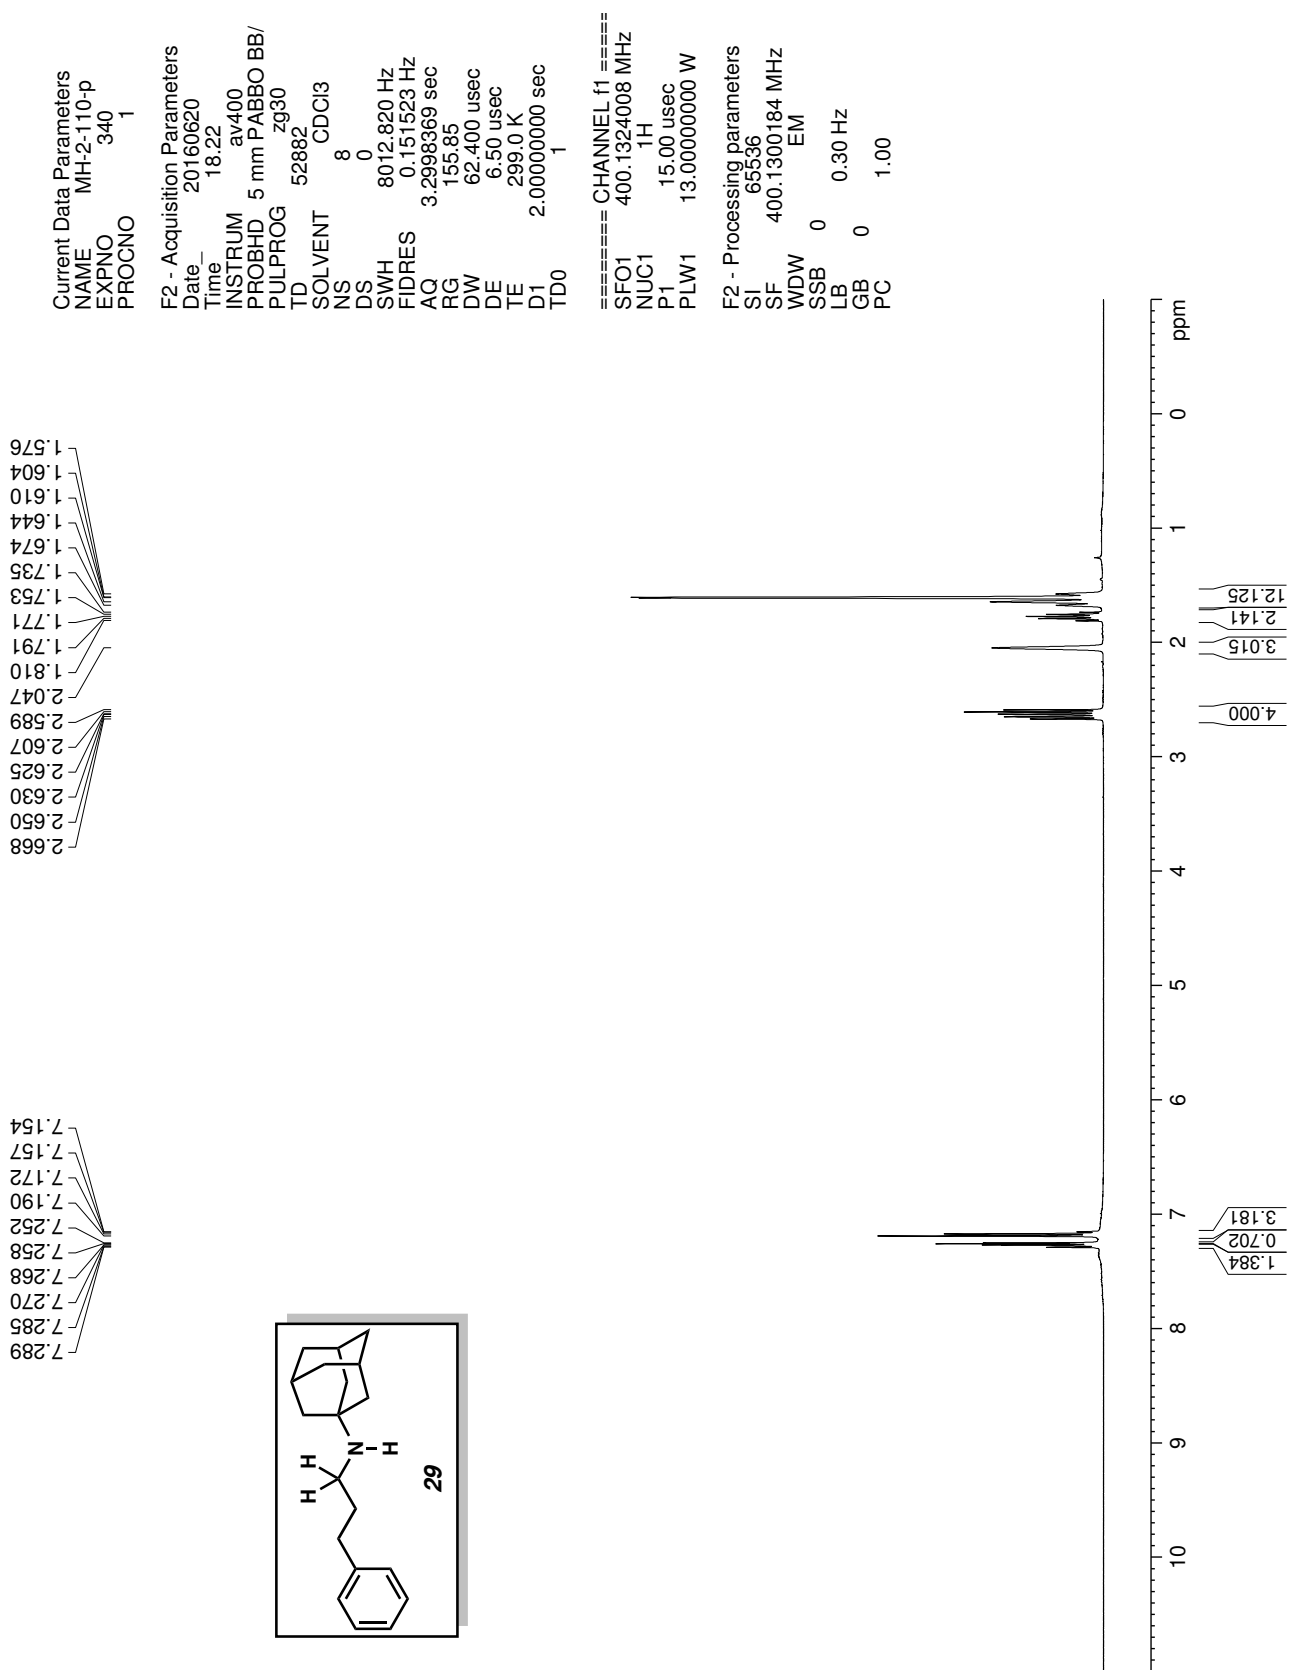

Current Data Parameters  
 NAME MH-2-050B-p  
 EXPNO 550  
 PROCNO 1

F2 - Acquisition Parameters  
 Date\_ 20160510  
 Time 18.31 h  
 INSTRUM av400  
 PROBHD 5 mm PABBO BB/  
 PULPROG zg30  
 TD 52882  
 SOLVENT CDCl3  
 NS 8  
 DS 0  
 SWH 8012.820 Hz  
 FIDRES 0.303045 Hz  
 AQ 3.2998369 sec  
 RG 155.85  
 DW 62.400 usec  
 DE 6.50 usec  
 TE 299.0 K  
 D1 2.0000000 sec  
 TD0 1  
 SFO1 400.1324008 MHz  
 NUC1 1H  
 P1 15.00 usec  
 PLW1 13.00000000 W

F2 - Processing parameters  
 SI 65536  
 SF 400.1300176 MHz  
 WDW EM  
 SSB 0  
 LB 0.30 Hz  
 GB 0  
 PC 1.00

1.882  
 1.901  
 1.920  
 1.939  
 1.958  
 2.640  
 2.659  
 2.678  
 2.924  
 3.325  
 3.344  
 3.363

6.660  
 6.679  
 6.695  
 7.176  
 7.184  
 7.193  
 7.203  
 7.210  
 7.227  
 7.233  
 7.265  
 7.270  
 7.281  
 7.286  
 7.288  
 7.307

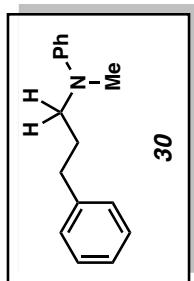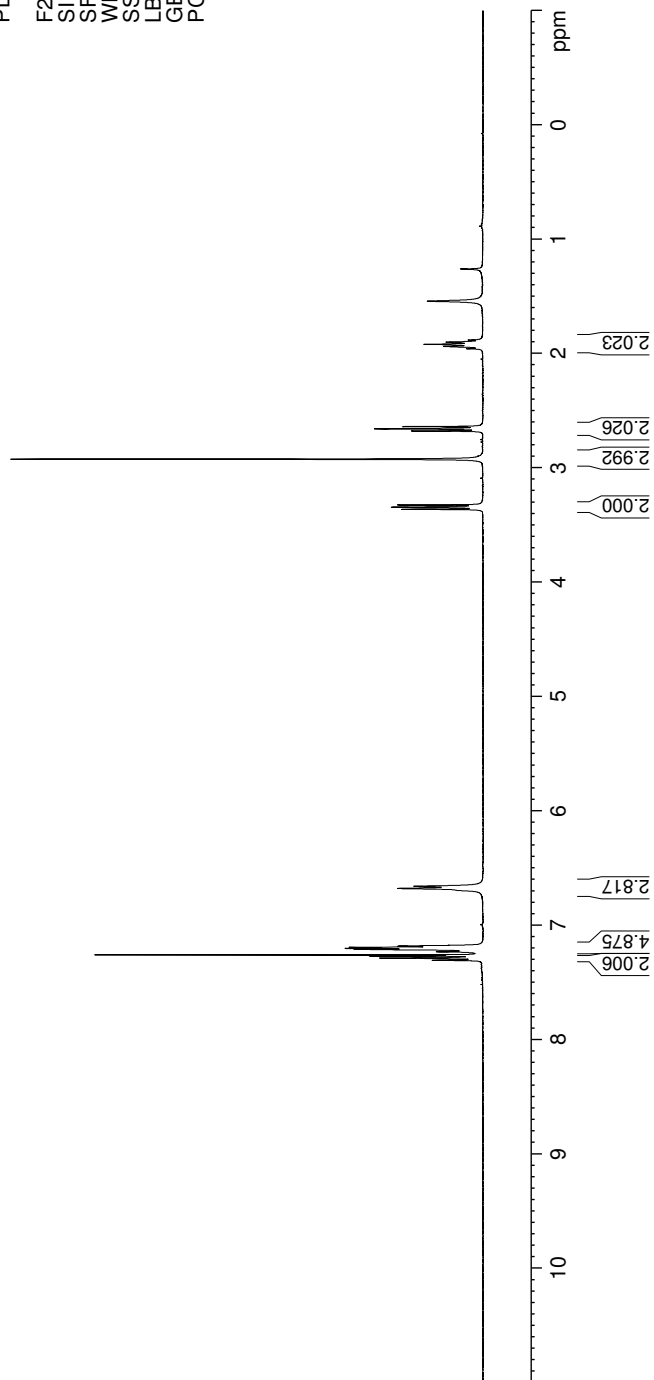



Current Data Parameters  
 NAME MH-2-053B-p  
 EXPNO 110  
 PROCNO 1

F2 - Acquisition Parameters  
 Date\_ 20160513  
 Time 11:22  
 INSTRUM av400  
 PROBHD 5 mm PABBO BB/  
 PULPROG zg30  
 TD 52882  
 SOLVENT CDCl3  
 NS 8  
 DS 0  
 SWH 8012.820 Hz  
 FIDRES 0.151523 Hz  
 AQ 3.2998369 sec  
 RG 155.85  
 DW 62.400 usec  
 DE 6.50 usec  
 TE 299.0 K  
 D1 2.00000000 sec  
 TD0 1

==== CHANNEL f1 =====  
 SFO1 400.1324008 MHz  
 NUC1 1H  
 P1 15.00 usec  
 PLW1 13.00000000 W

F2 - Processing parameters  
 SI 65536  
 SF 400.1300178 MHz  
 WDW EM  
 SSB 0  
 LB 0 0.30 Hz  
 GB 0  
 PC 1.00

3.573  
 2.610  
 2.591  
 2.571  
 2.509  
 2.492  
 2.474  
 1.868  
 1.850  
 1.831  
 1.813  
 1.795

7.429  
 7.410  
 7.381  
 7.362  
 7.333  
 7.314  
 7.295  
 7.259  
 7.247  
 7.238  
 7.234  
 7.215  
 7.183  
 7.170  
 7.152  
 7.134  
 7.099  
 7.097  
 7.079

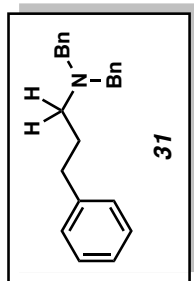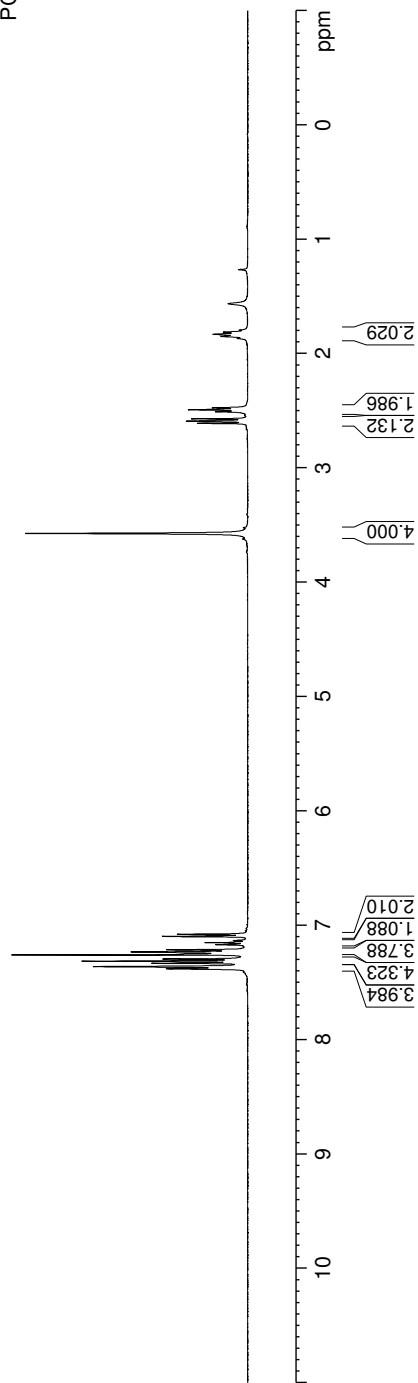

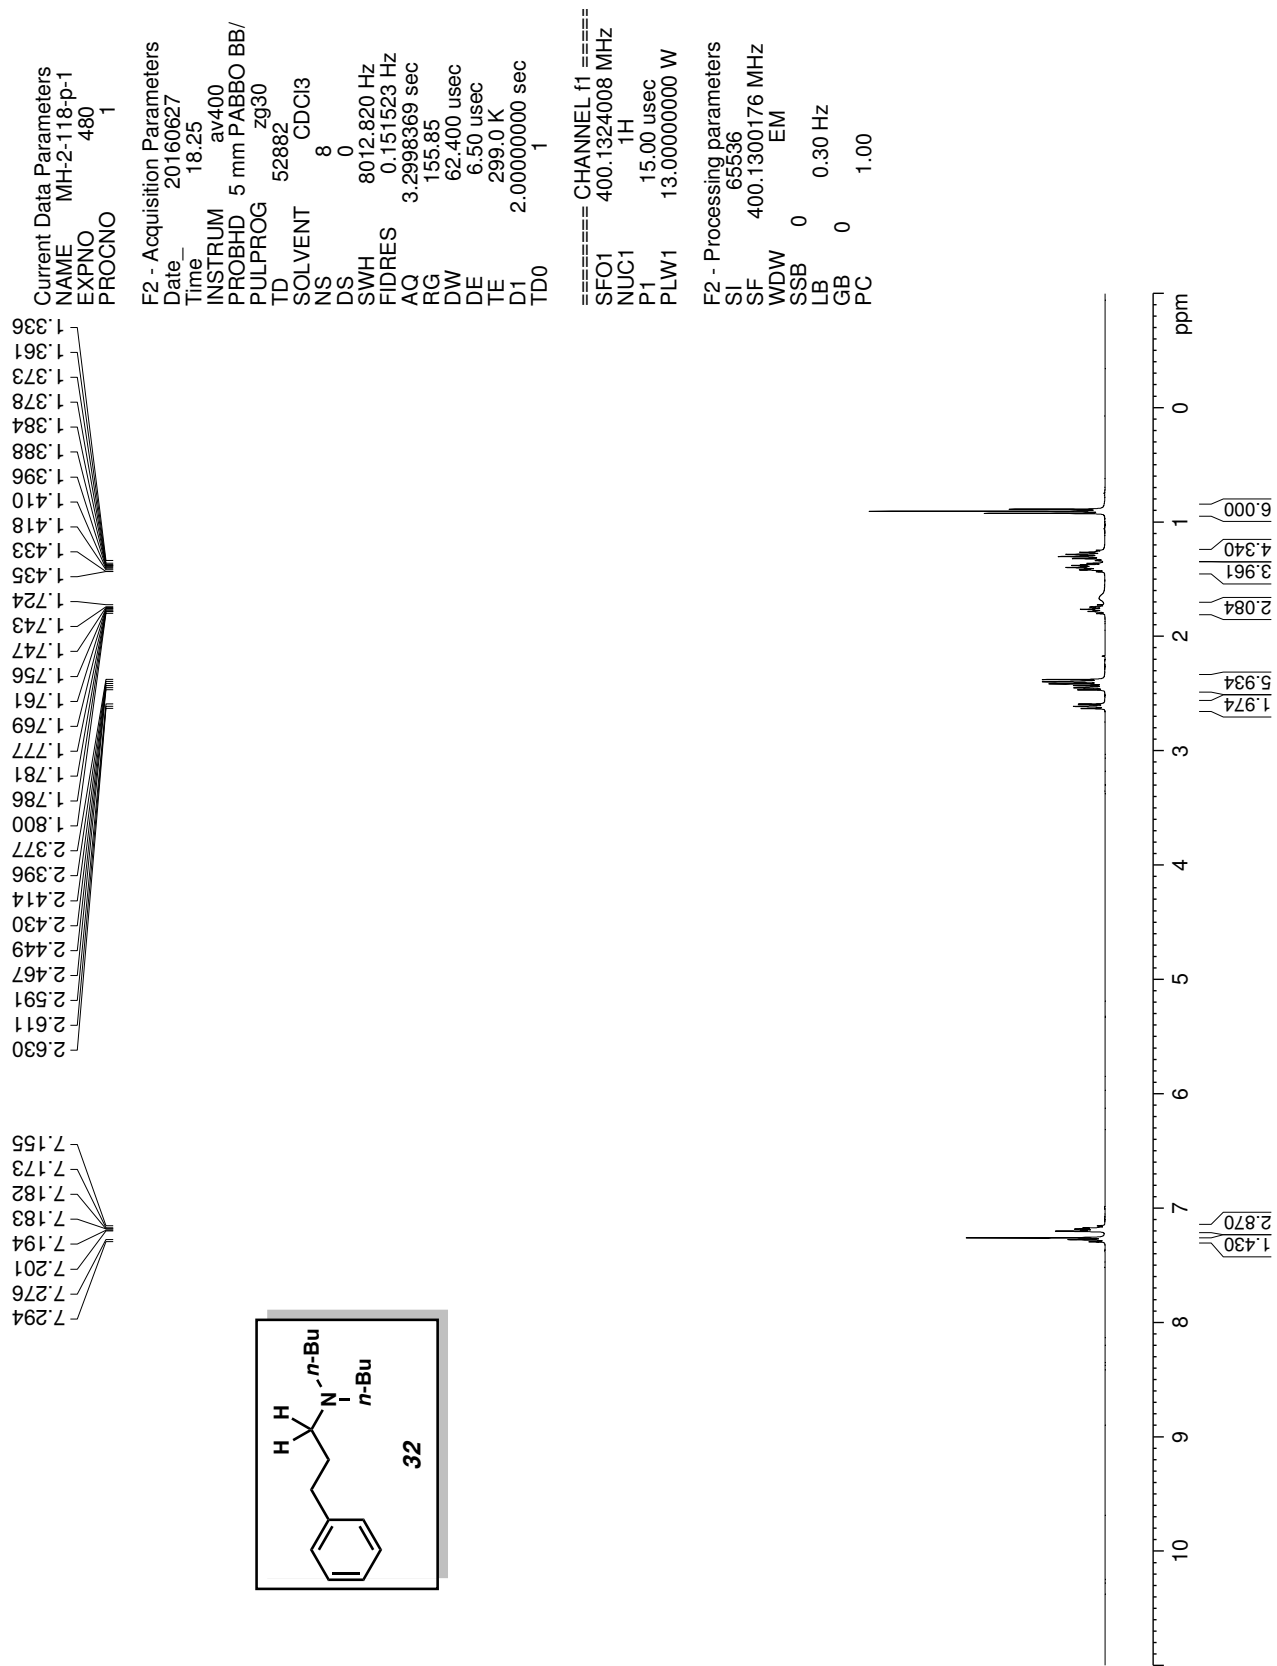

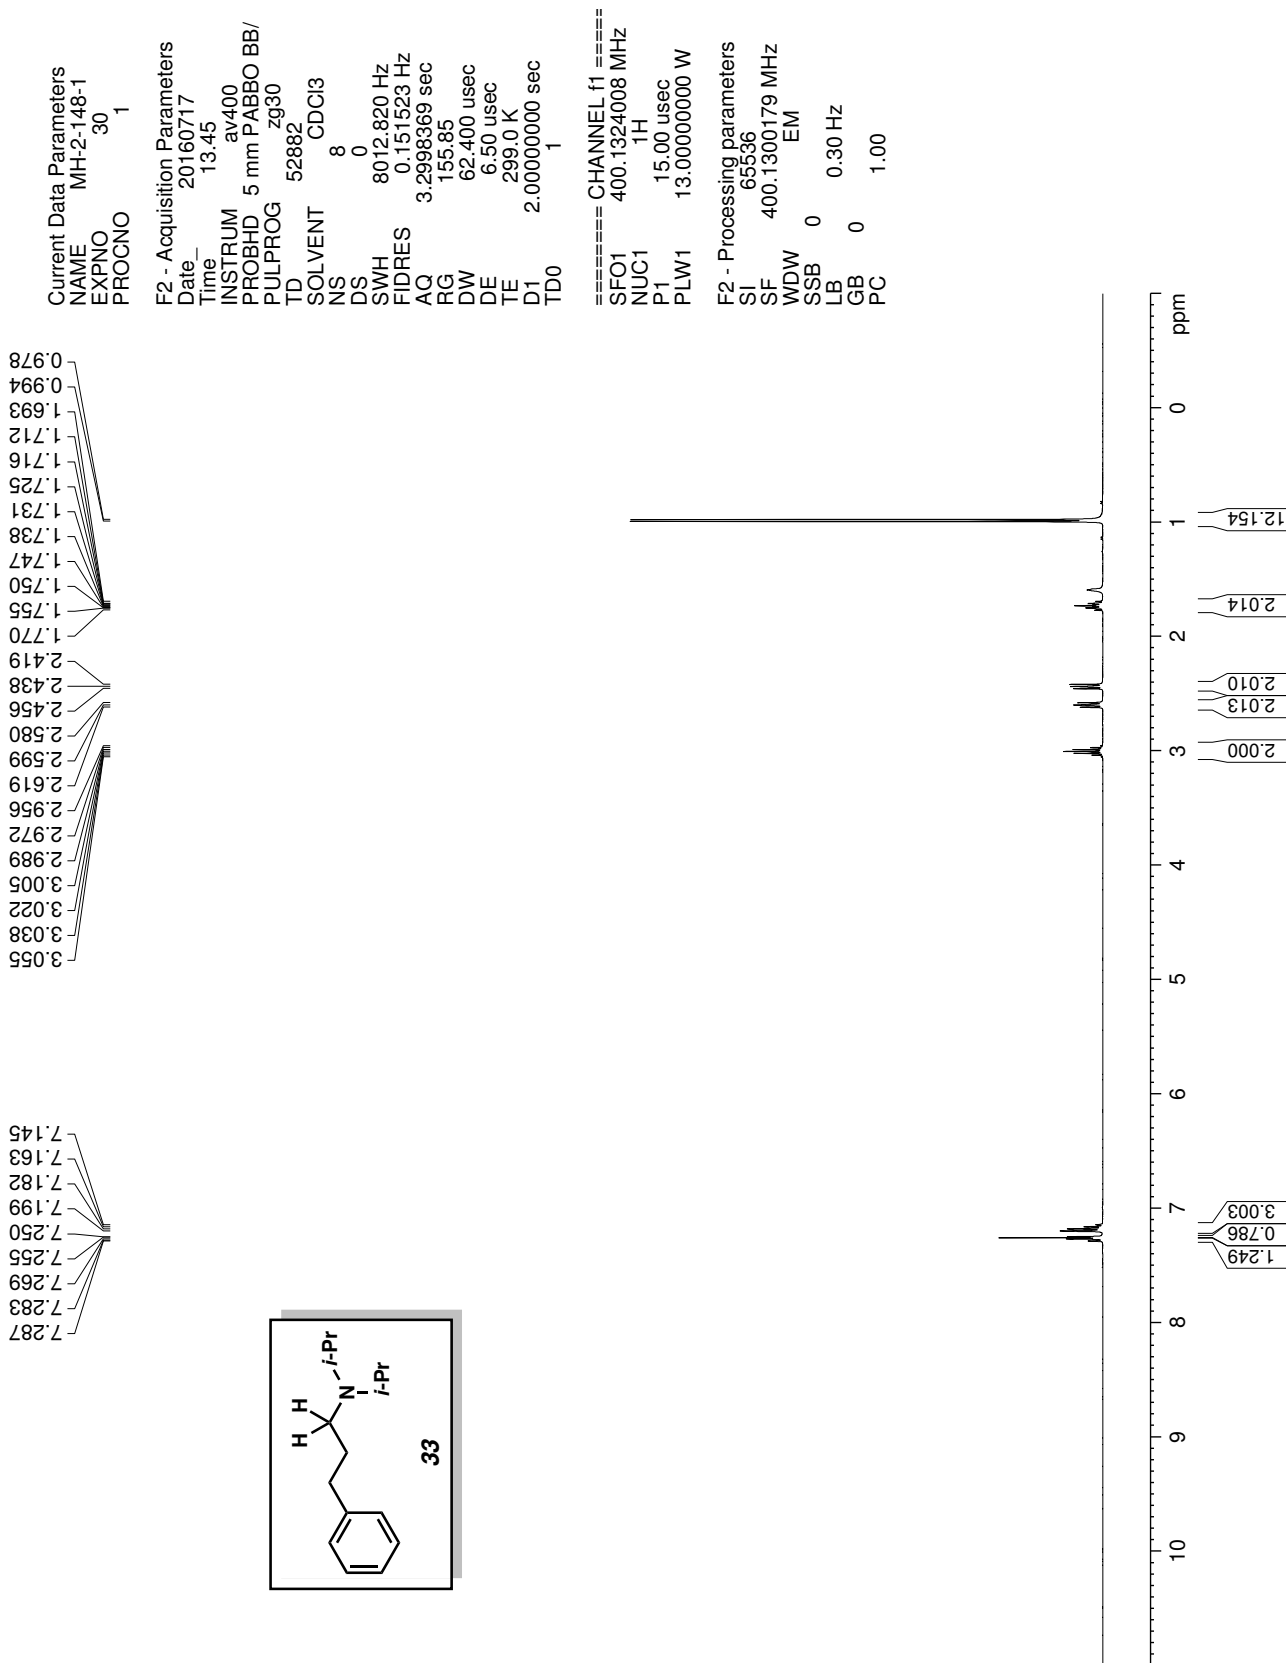

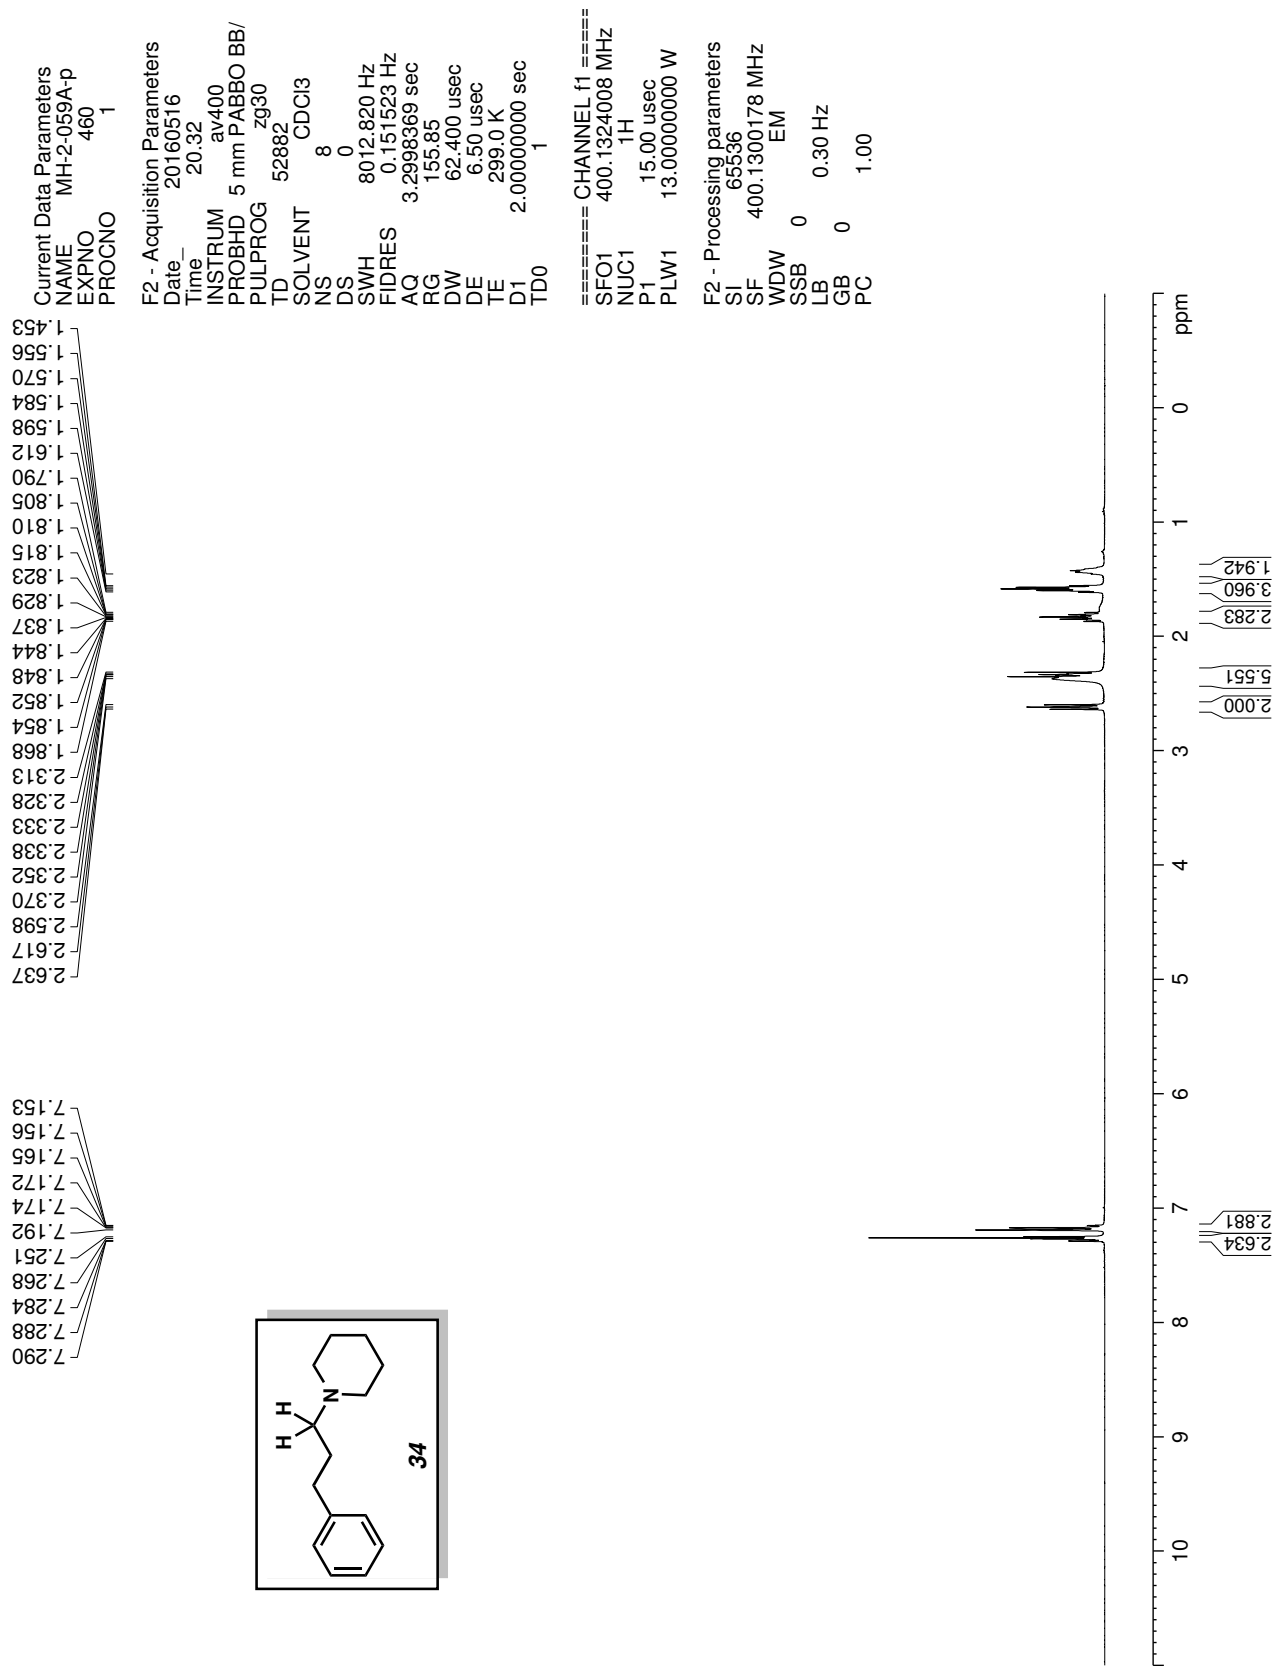

Current Data Parameters  
 NAME MH-2-065C-p  
 EXPNO 380  
 PROCNO 1

F2 - Acquisition Parameters  
 Date\_ 20160524  
 Time 18.35  
 INSTRUM av400  
 PROBHD 5 mm PABBO BB/  
 PULPROG zg30  
 TD 52882  
 SOLVENT CDCl3  
 NS 8  
 DS 0  
 SWH 8012.820 Hz  
 FIDRES 0.151523 Hz  
 AQ 3.2998369 sec  
 RG 155.85  
 DW 62.400 usec  
 DE 6.50 usec  
 TE 299.0 K  
 D1 2.00000000 sec  
 TD0 1

==== CHANNEL f1 =====  
 SFO1 400.1324008 MHz  
 NUC1 1H  
 P1 15.00 usec  
 PLW1 13.00000000 W

F2 - Processing parameters  
 SI 65536  
 SF 400.1300175 MHz  
 WDW EM  
 SSB 0  
 LB 0.30 Hz  
 GB 0  
 PC 1.00

1.795  
 1.814  
 1.833  
 1.851  
 1.871  
 2.359  
 2.378  
 2.396  
 2.447  
 2.629  
 2.648  
 2.667  
 3.716  
 3.727  
 3.739

7.165  
 7.174  
 7.175  
 7.183  
 7.188  
 7.195  
 7.200  
 7.273  
 7.277  
 7.277  
 7.279  
 7.284  
 7.297

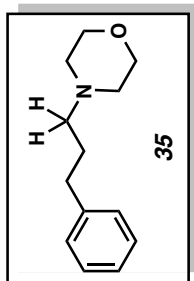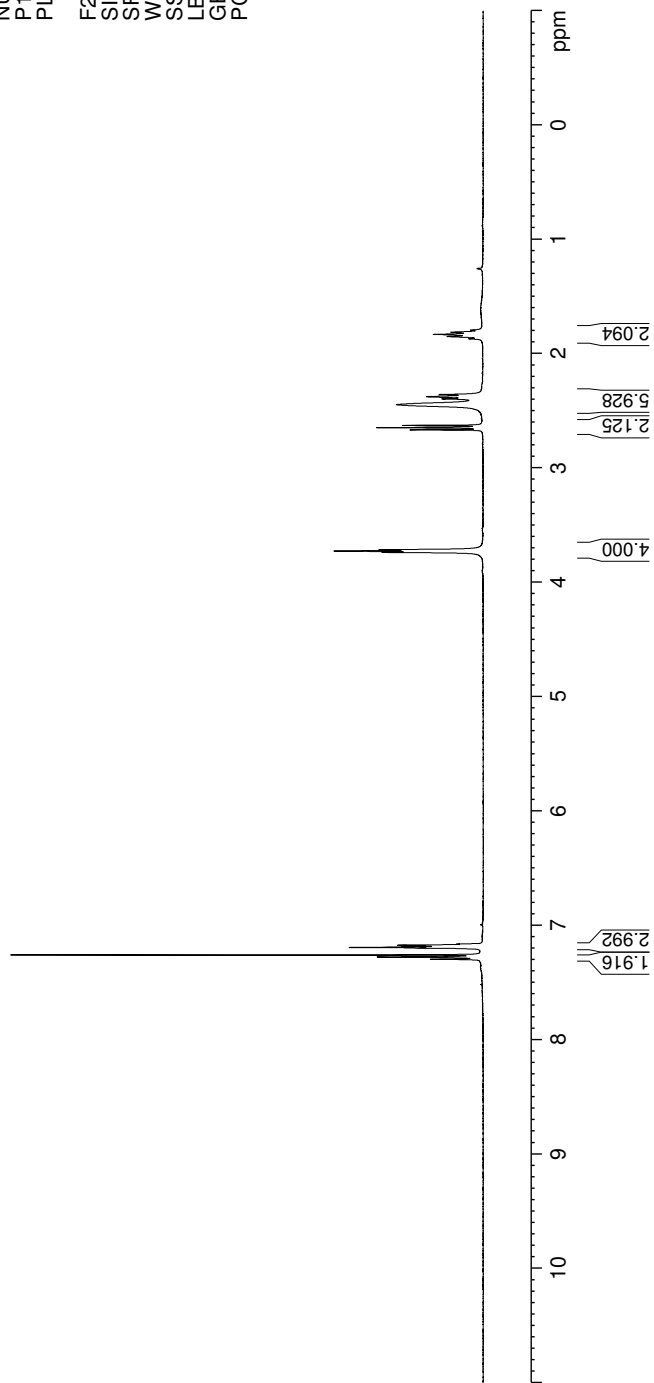

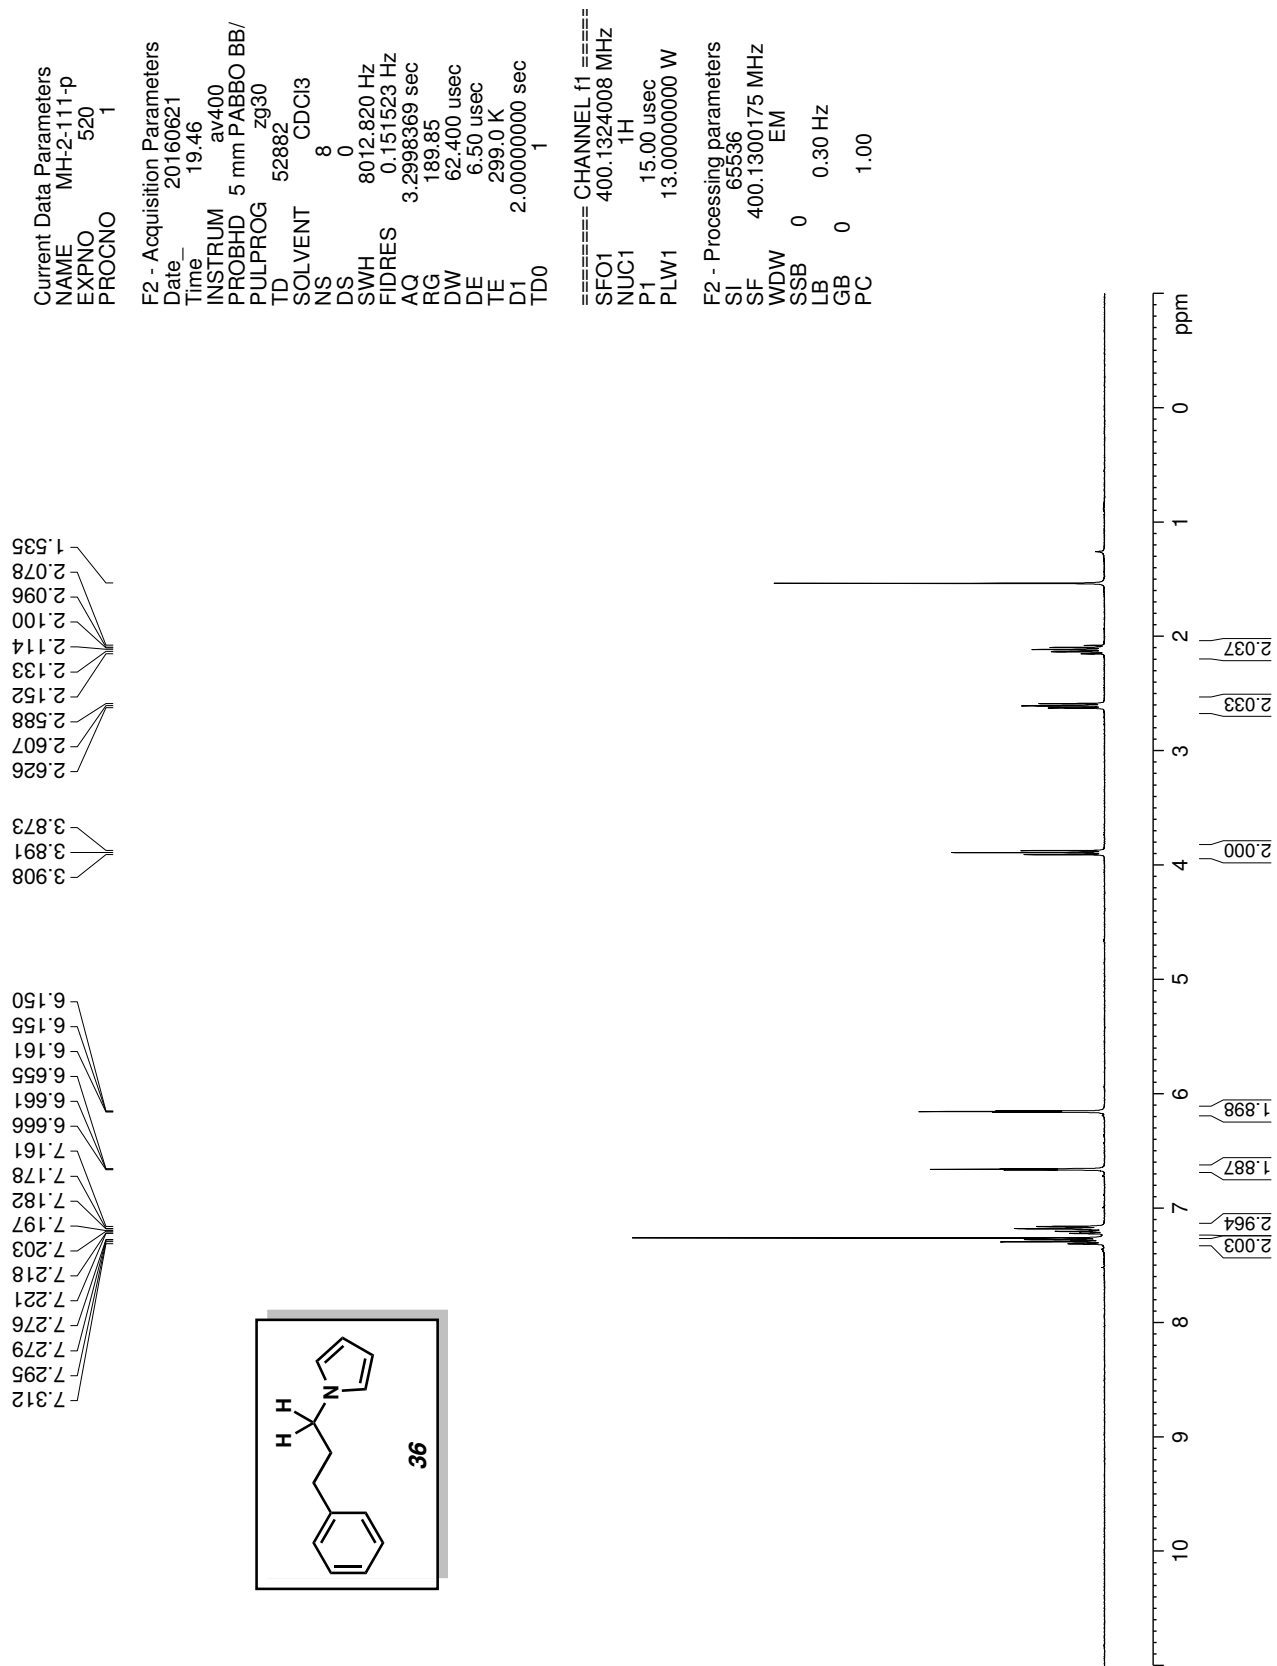

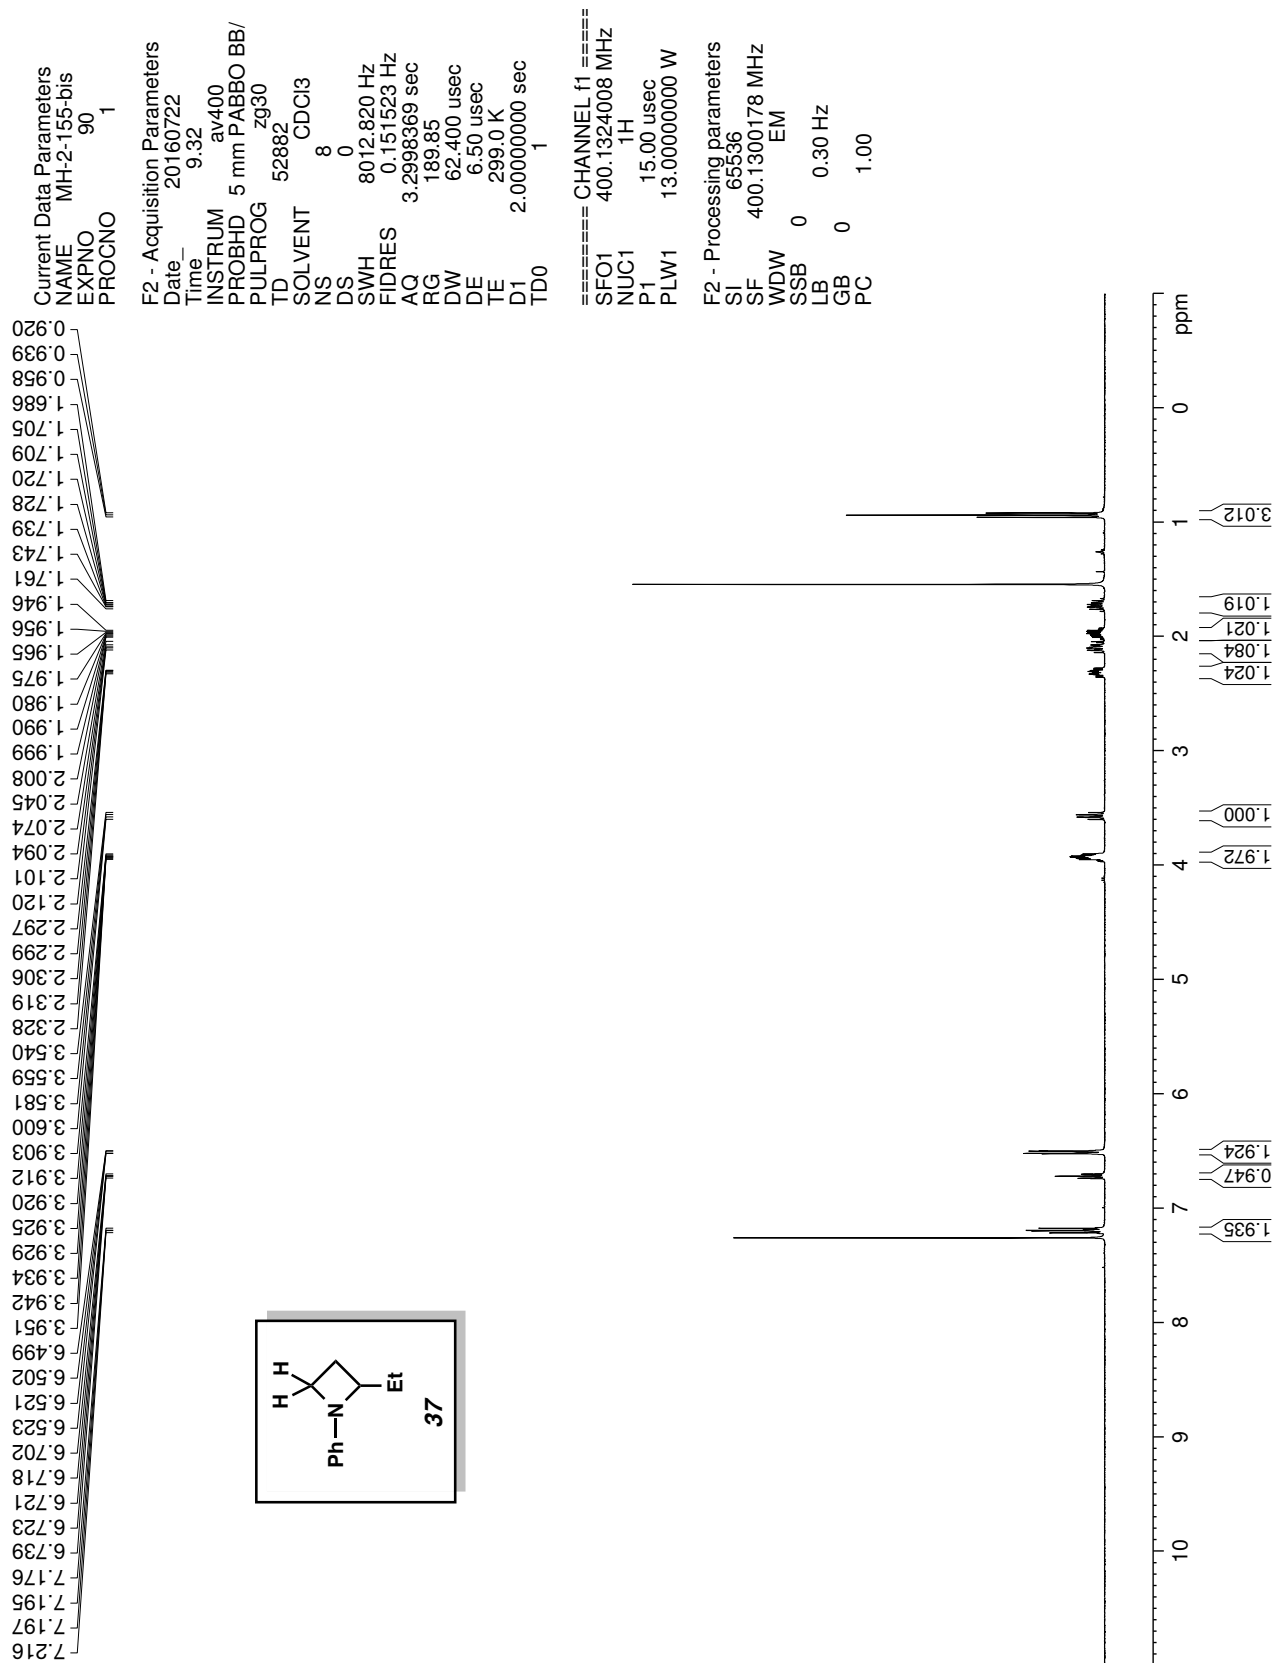

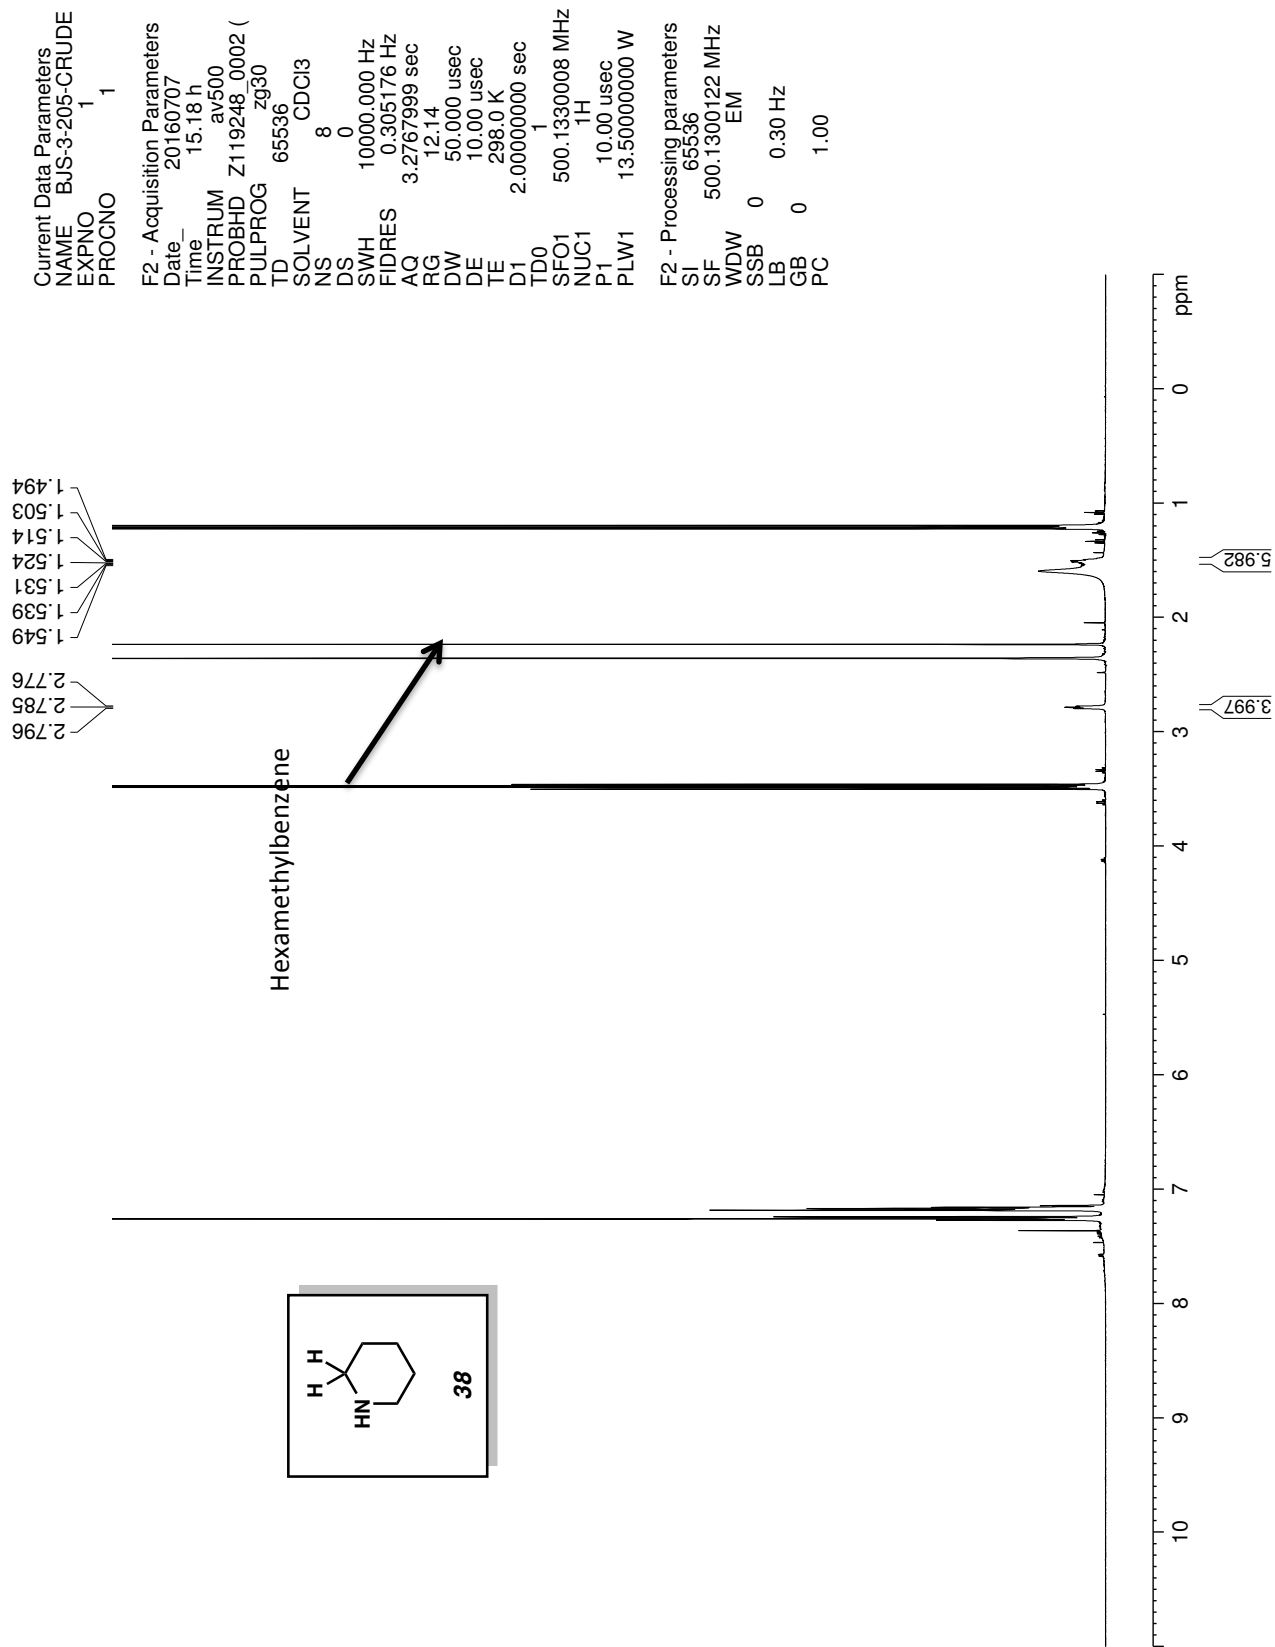



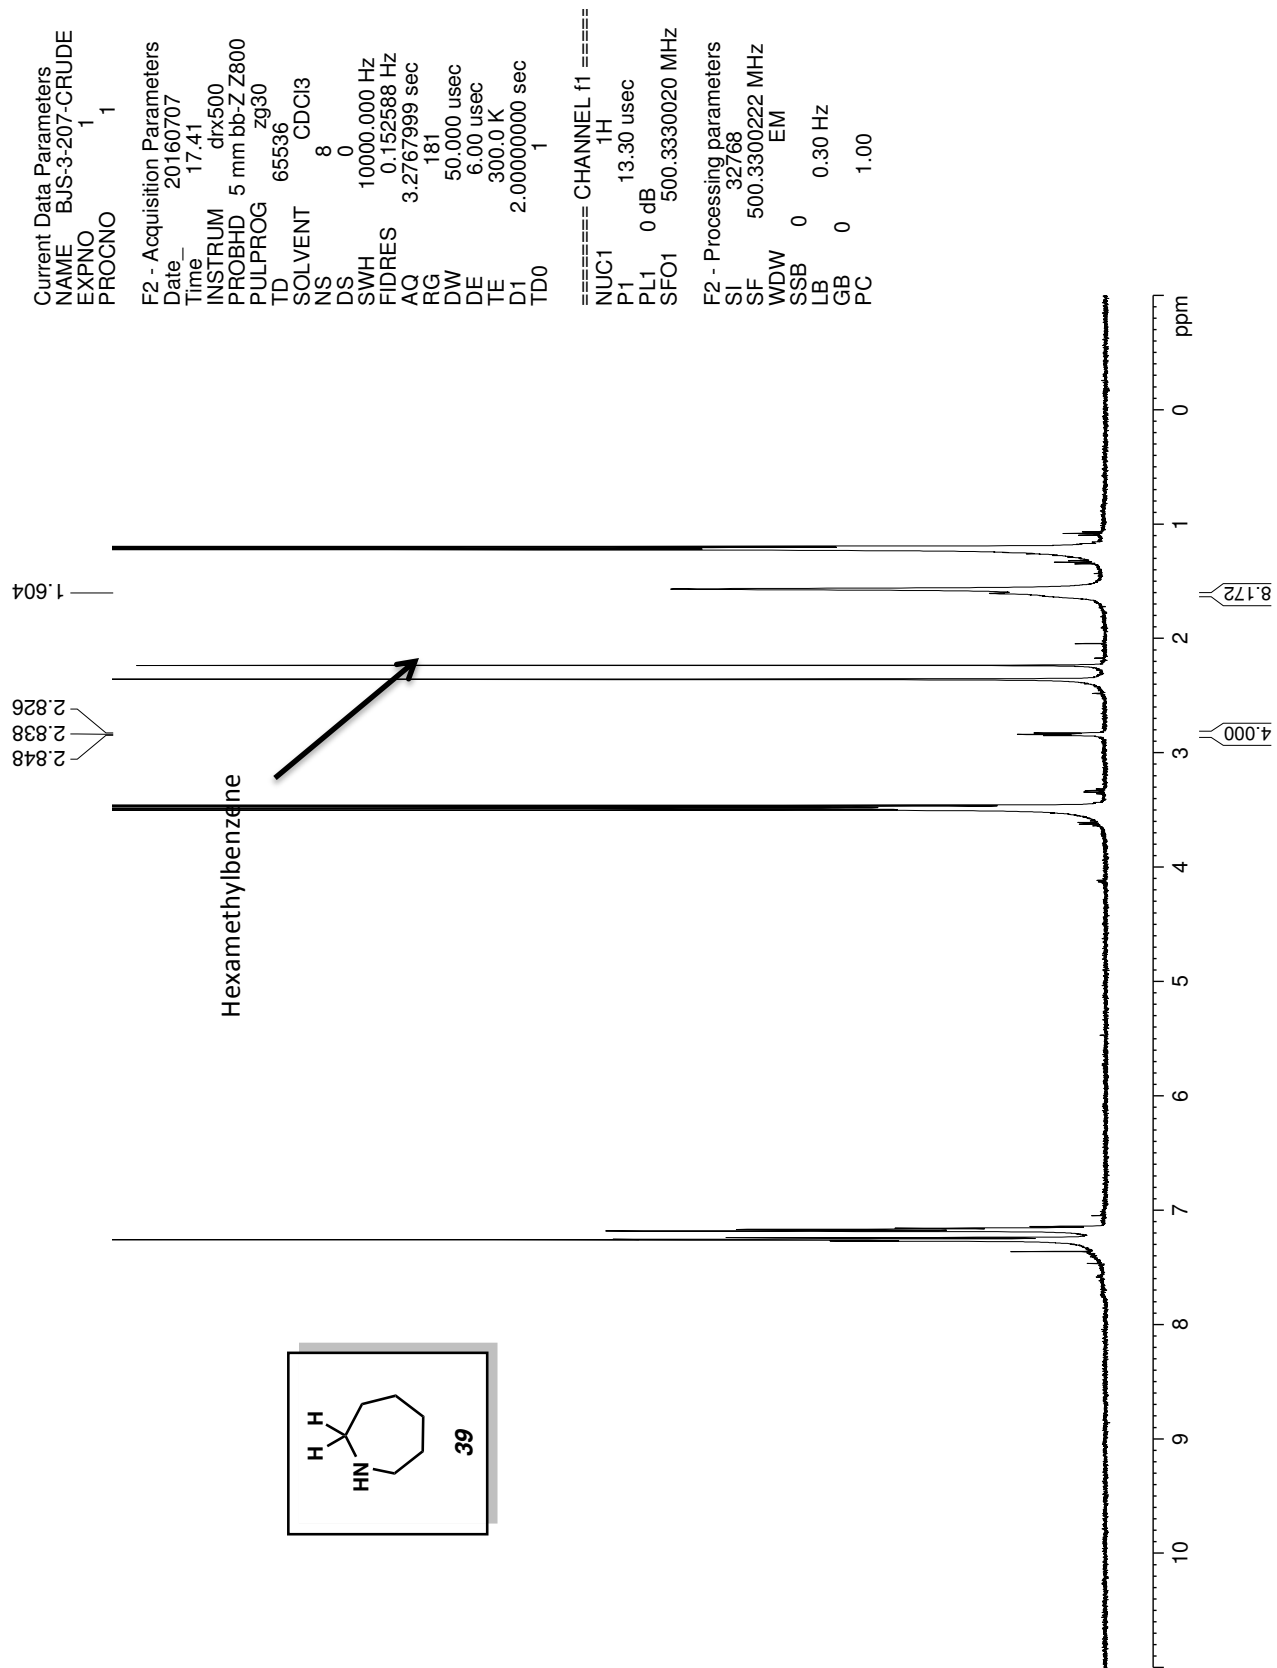

Current Data Parameters  
 NAME BJS-3-192-PURE  
 EXPNO 1  
 PROCNO 1

F2 - Acquisition Parameters  
 Date\_ 20160710  
 Time 14:57 h  
 INSTRUM av500  
 PROBHD Z119248\_0002 (  
 PULPROG zg30  
 TD 65536  
 SOLVENT CDCl3  
 NS 8  
 DS 0  
 SWH 10000.000 Hz  
 FIDRES 0.305176 Hz  
 AQ 3.2767999 sec  
 RG 7.89  
 DW 50.000 usec  
 DE 10.00 usec  
 TE 298.0 K  
 D1 2.00000000 sec  
 TD0 1  
 SFO1 500.1330008 MHz  
 NUC1 1H  
 P1 10.00 usec  
 PLW1 13.50000000 W

F2 - Processing parameters  
 SI 65536  
 SF 500.1300125 MHz  
 WDW EM  
 SSB 0  
 LB 0.30 Hz  
 GB 0  
 PC 1.00

1.342  
 1.365  
 1.369  
 1.386  
 1.397  
 1.411  
 1.450  
 1.461  
 1.473  
 1.484  
 1.496  
 2.610  
 2.622  
 2.633

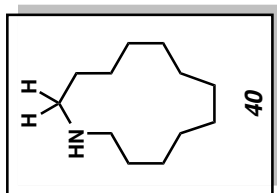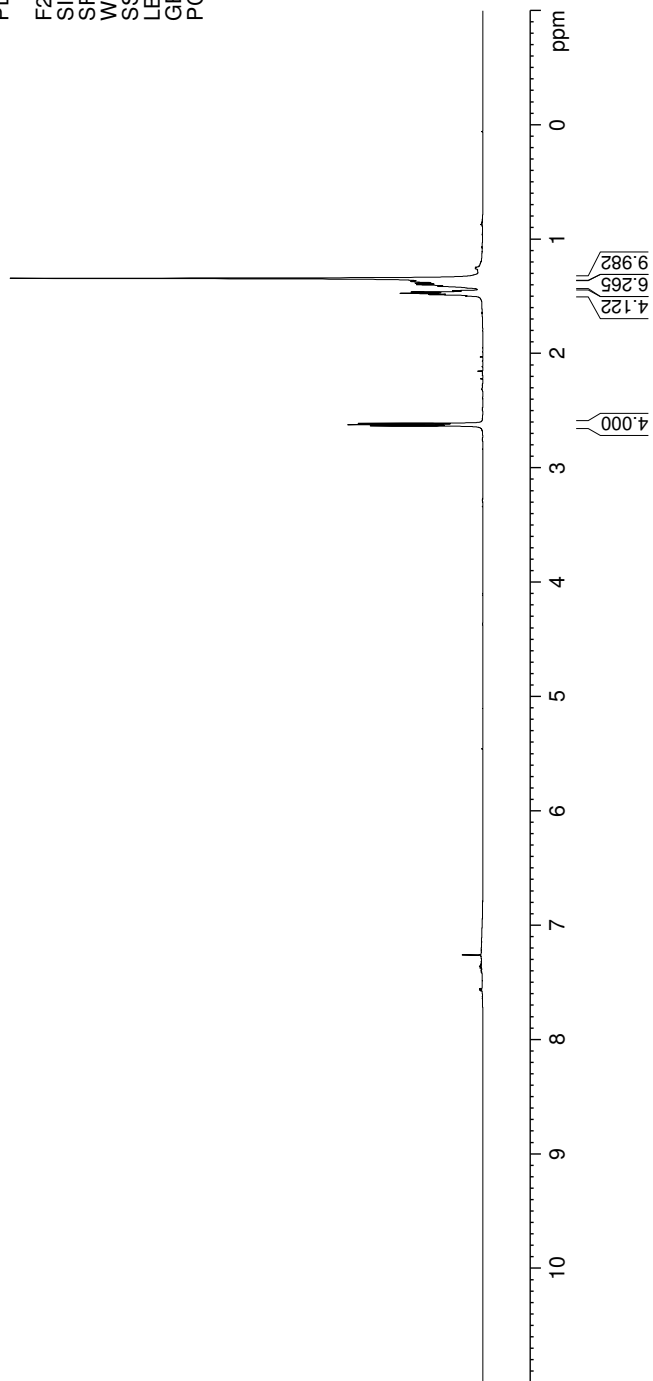

Current Data Parameters  
 NAME BJS-3-263-PROTON  
 EXPNO 1  
 PROCNO 1

F2 - Acquisition Parameters

Date\_ 20161019  
 Time 18:37 h  
 INSTRUM av500  
 PROBHD Z119248\_0002 (  
 PULPROG zg30  
 TD 65536  
 SOLVENT CDCl3  
 NS 8  
 DS 0  
 SWH 1000.000 Hz  
 FIDRES 0.305176 Hz  
 AQ 3.2767999 sec  
 RG 12.14  
 DW 50.000 usec  
 DE 10.00 usec  
 TE 298.0 K  
 D1 2.0000000 sec  
 TD0 1  
 SFO1 500.1330008 MHz  
 NUC1 1H  
 P1 10.00 usec  
 PLW1 13.50000000 W

F2 - Processing parameters

SI 65536  
 SF 500.1300121 MHz  
 WDW EM  
 SSB 0  
 LB 0  
 GB 0  
 PC 1.00

3.706  
 2.973  
 2.961  
 2.705  
 2.691  
 2.678  
 2.664  
 2.648  
 2.634  
 2.620  
 2.607  
 2.594  
 1.919  
 1.906  
 1.892  
 1.879  
 1.866  
 1.852  
 1.816  
 1.802  
 1.789  
 1.772  
 1.758  
 1.741  
 1.728  
 1.714  
 0.958  
 0.945

7.286  
 7.271  
 7.269  
 7.260  
 7.256  
 7.187  
 7.173  
 7.161  
 7.159

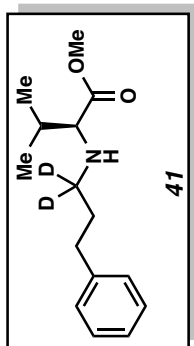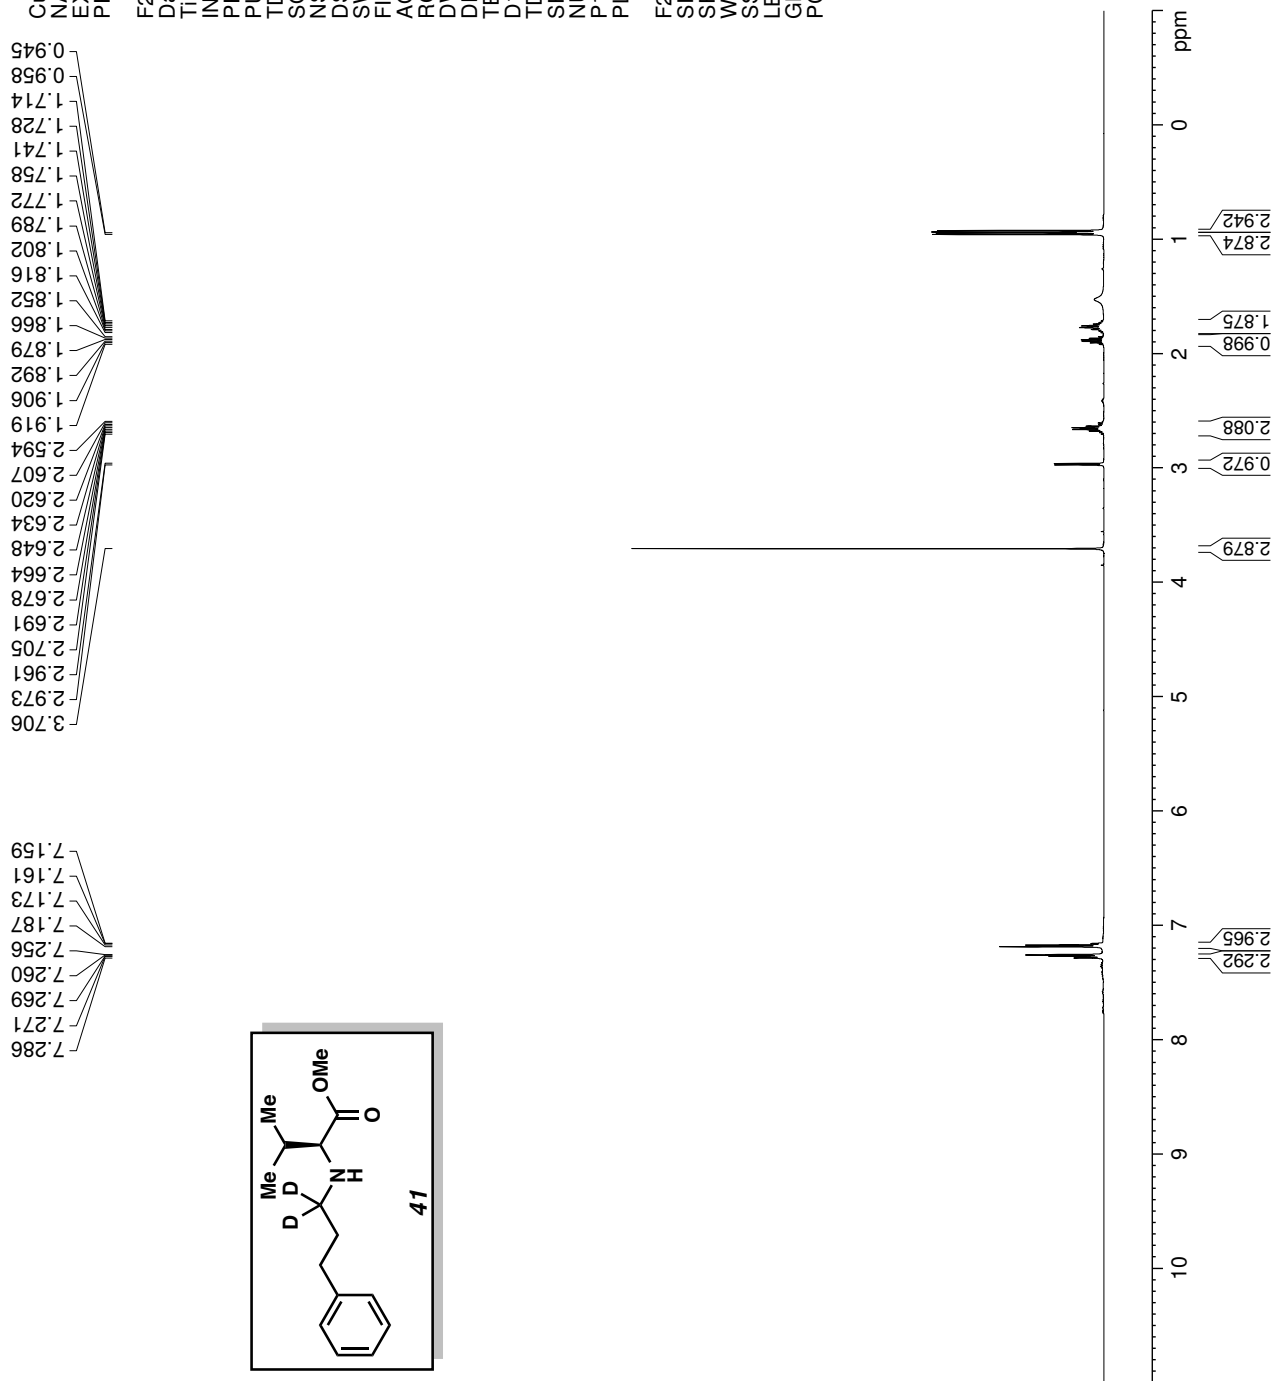

Current Data Parameters  
 NAME BJS-3-267-PROTON:  
 EXPNO 1  
 PROCNO 1

F2 - Acquisition Parameters

Date\_ 20161023  
 Time 10.50 h  
 INSTRUM av500  
 PROBHD Z119248\_0002 (  
 PULPROG zg30  
 TD 65536  
 SOLVENT CD2Cl2  
 NS 8  
 DS 0  
 SWH 10000.000 Hz  
 FIDRES 0.305176 Hz  
 AQ 3.2767999 sec  
 RG 12.14  
 DW 50.000 usec  
 DE 10.00 usec  
 TE 298.0 K  
 D1 2.00000000 sec  
 TD0 1  
 SFO1 500.1330008 MHz  
 NUC1 1H  
 P1 10.00 usec  
 PLW1 13.50000000 W

F2 - Processing parameters

SI 65536  
 SF 500.1300193 MHz  
 WDW EM  
 SSB 0  
 LB 0  
 GB 0  
 PC 1.00

1.673  
1.688  
1.699  
1.714  
1.729  
1.743  
1.756  
1.770  
2.575  
2.590  
2.605  
2.818  
2.832  
2.845  
2.859  
2.871  
2.886  
2.899  
3.431  
3.444  
3.458  
3.622

6.714  
6.731  
7.020  
7.036  
7.125  
7.139  
7.153  
7.168  
7.232  
7.247  
7.262

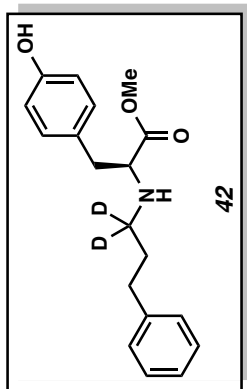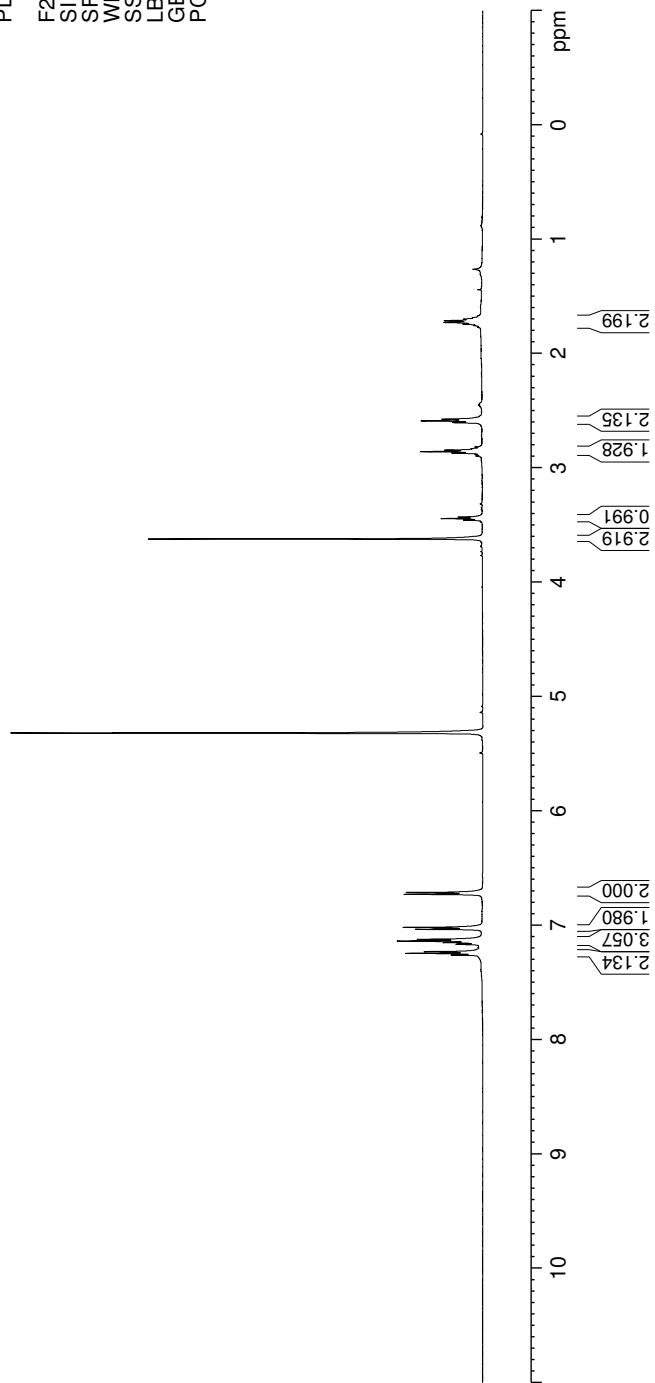

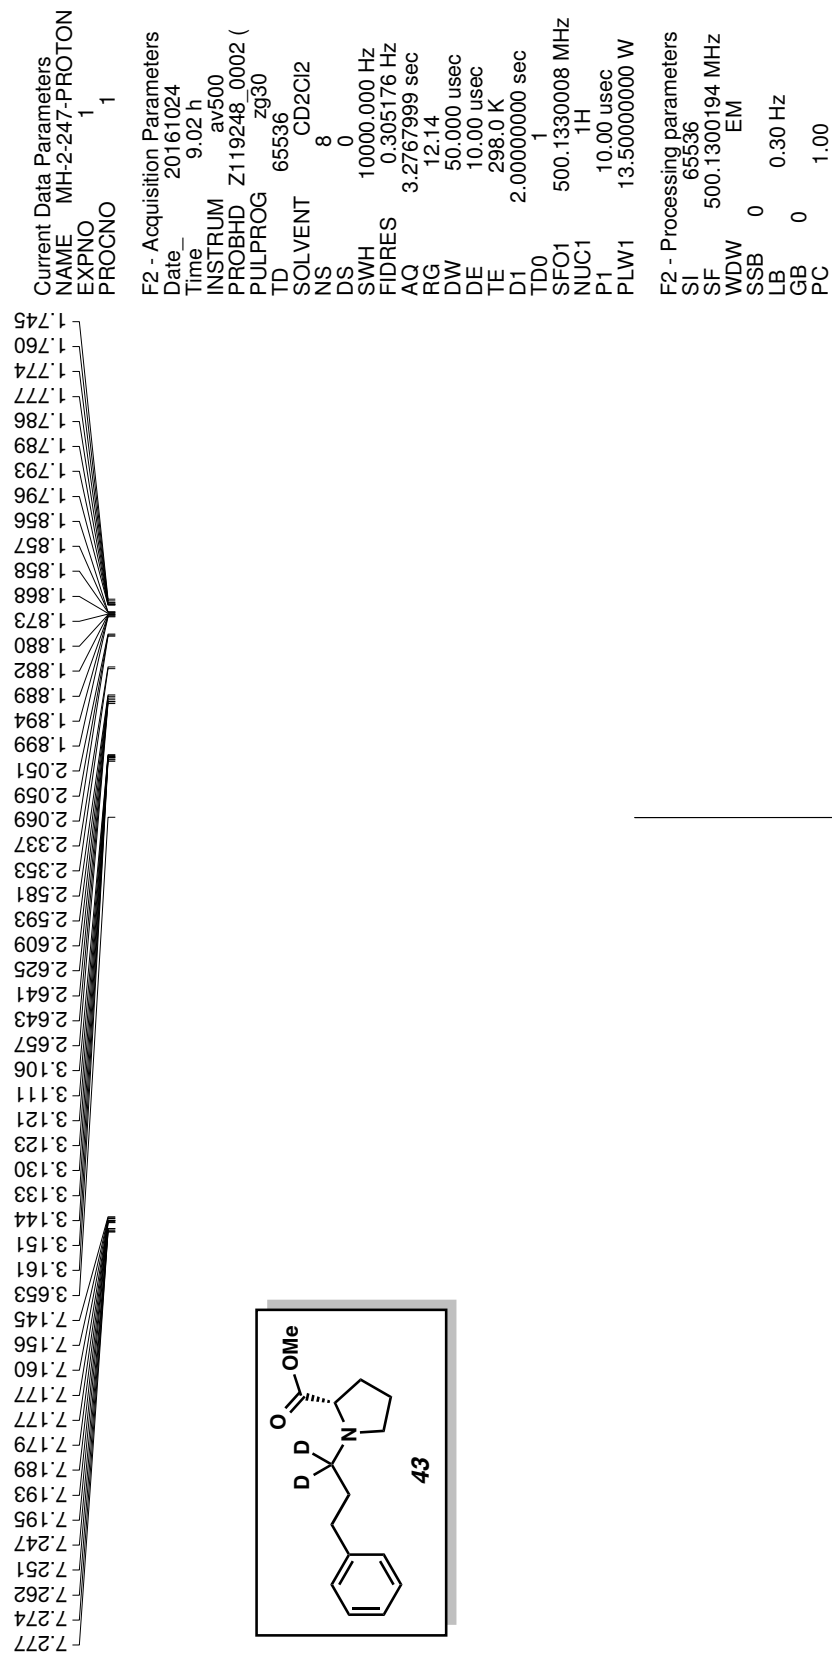

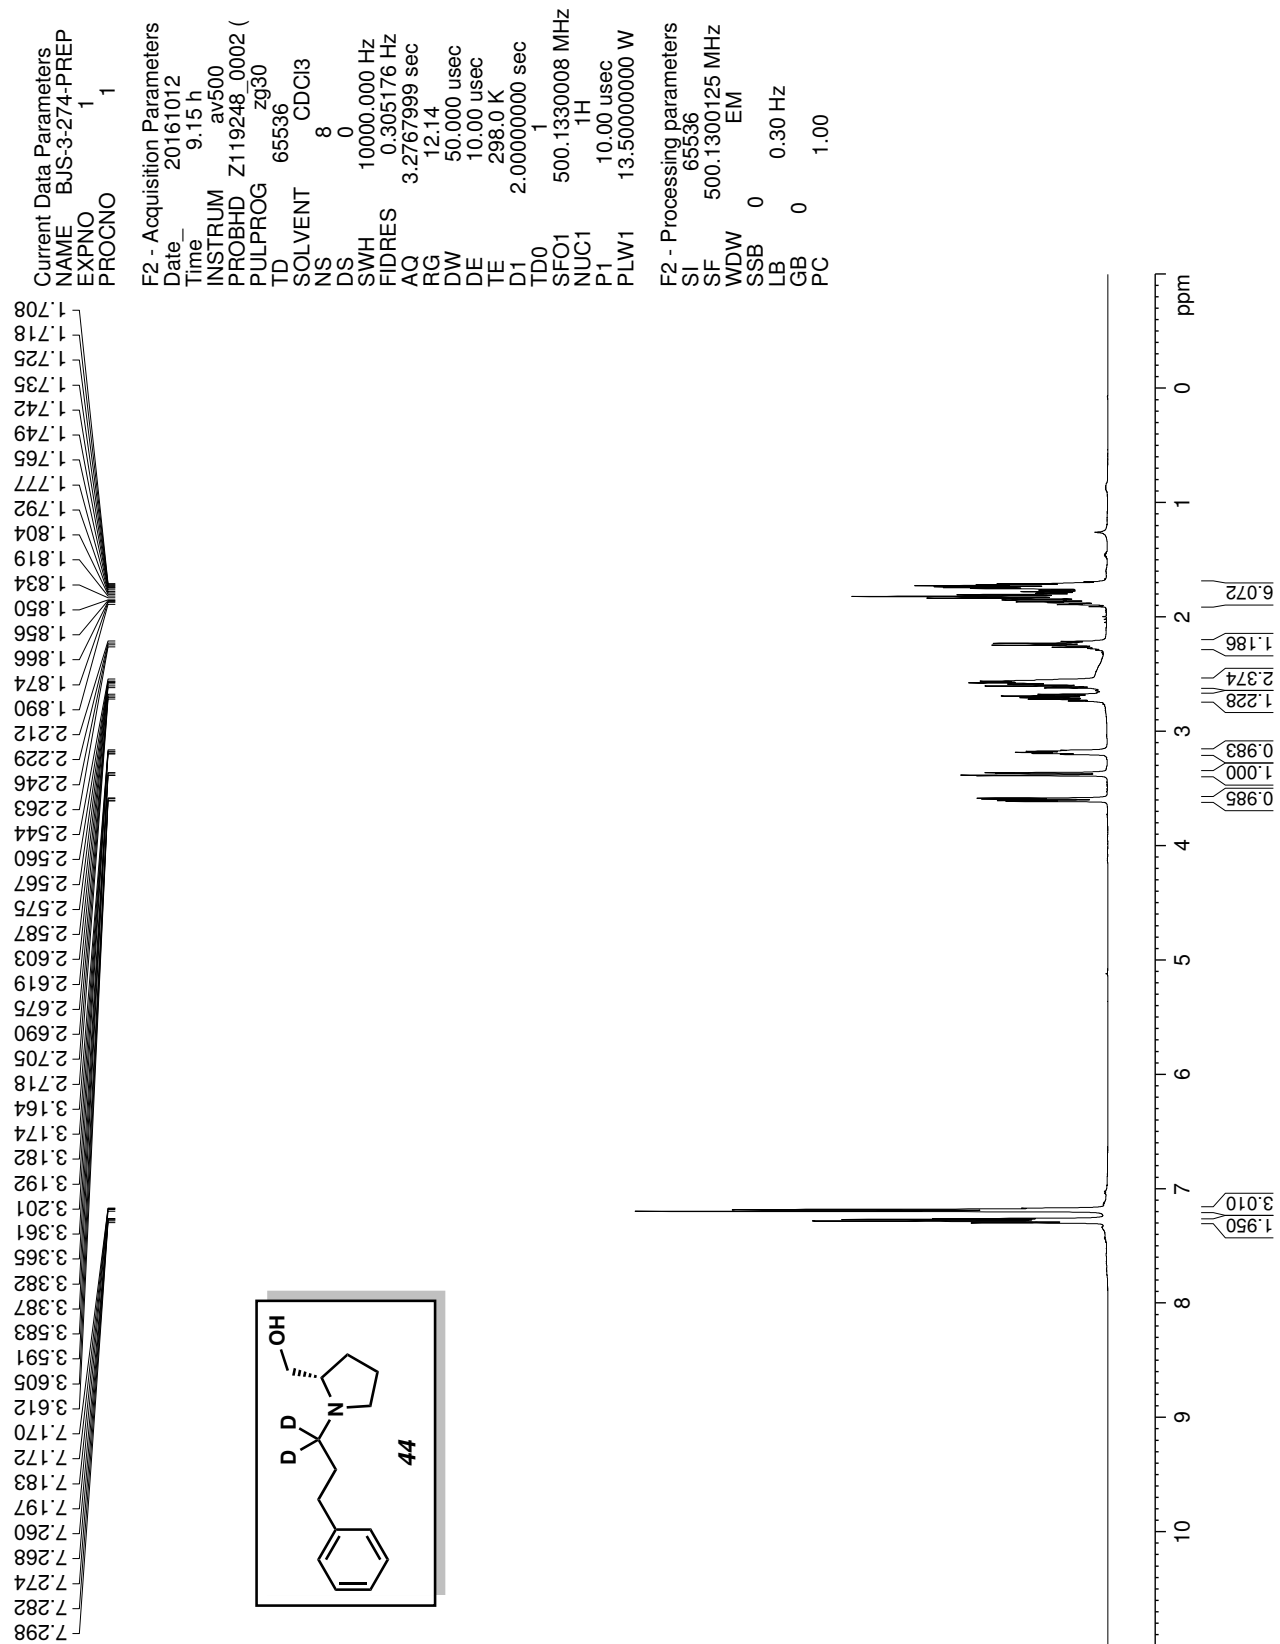

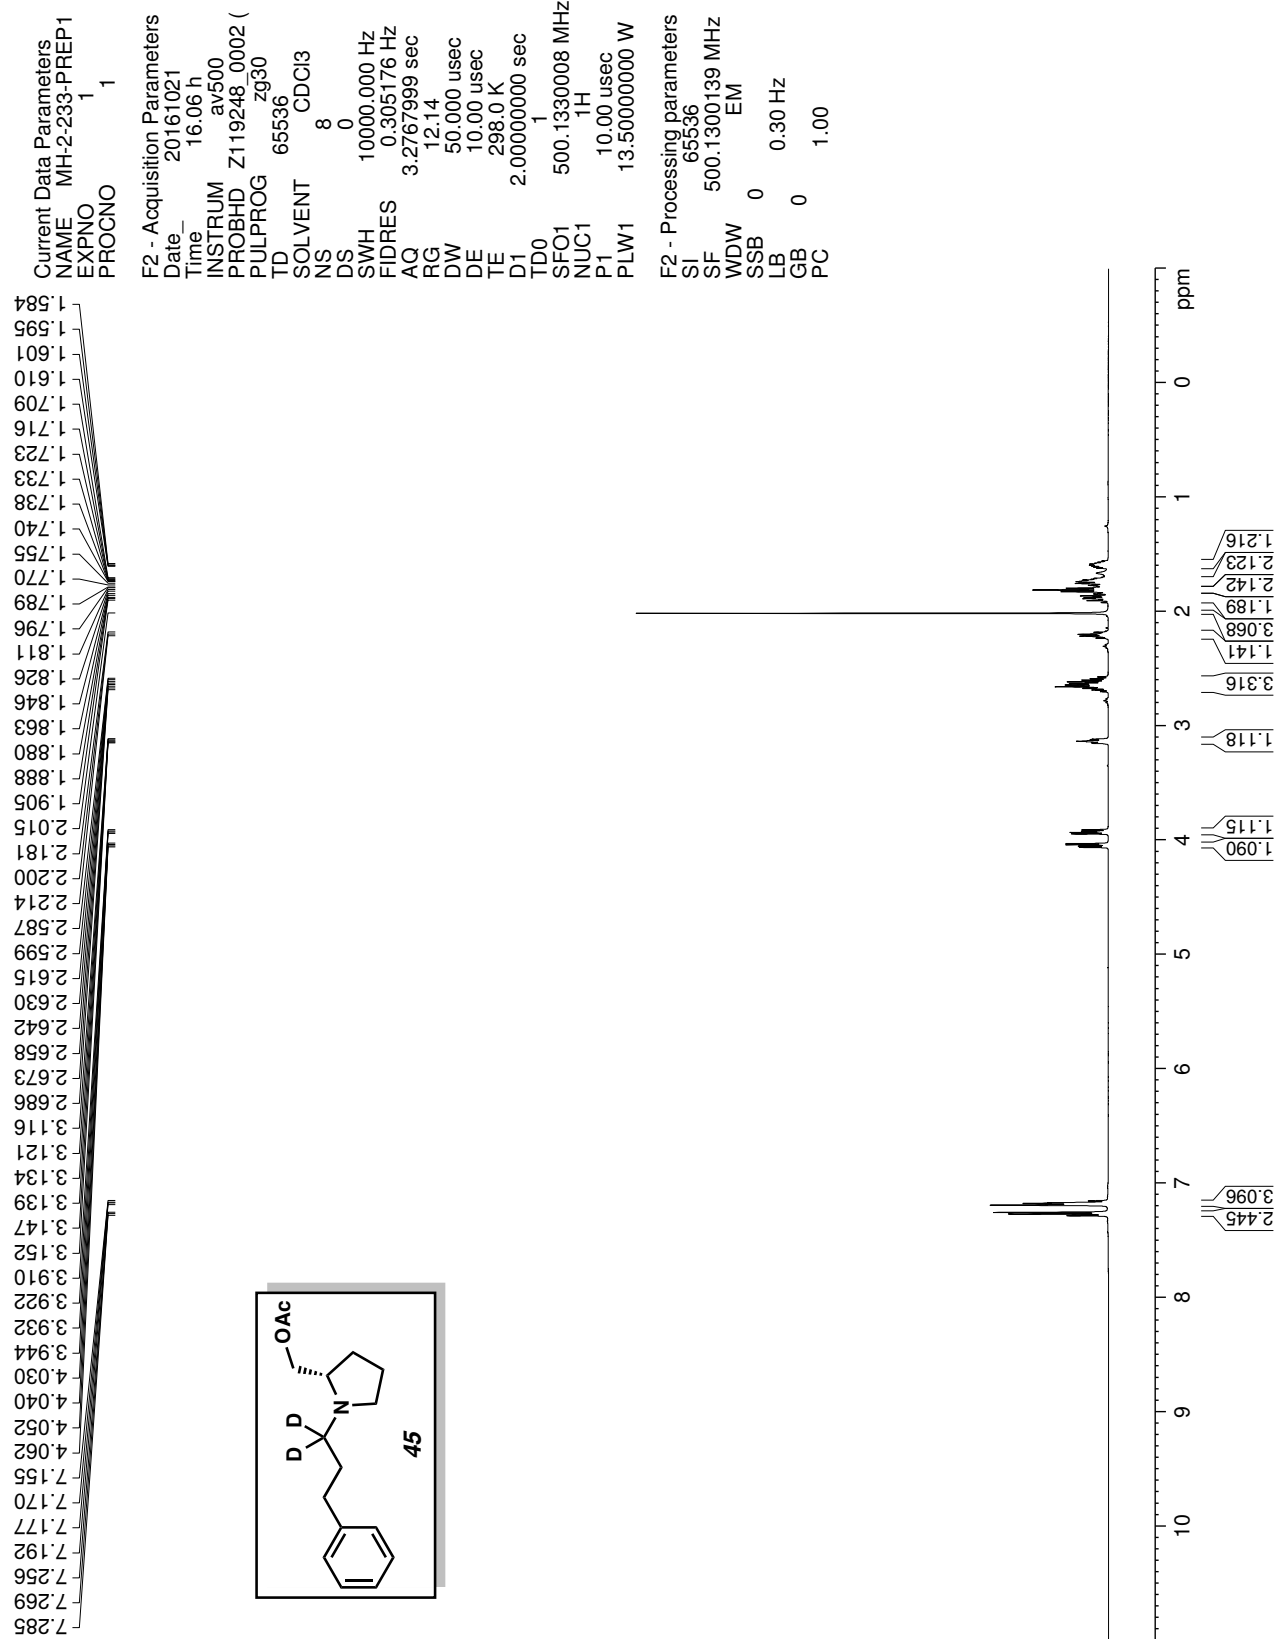

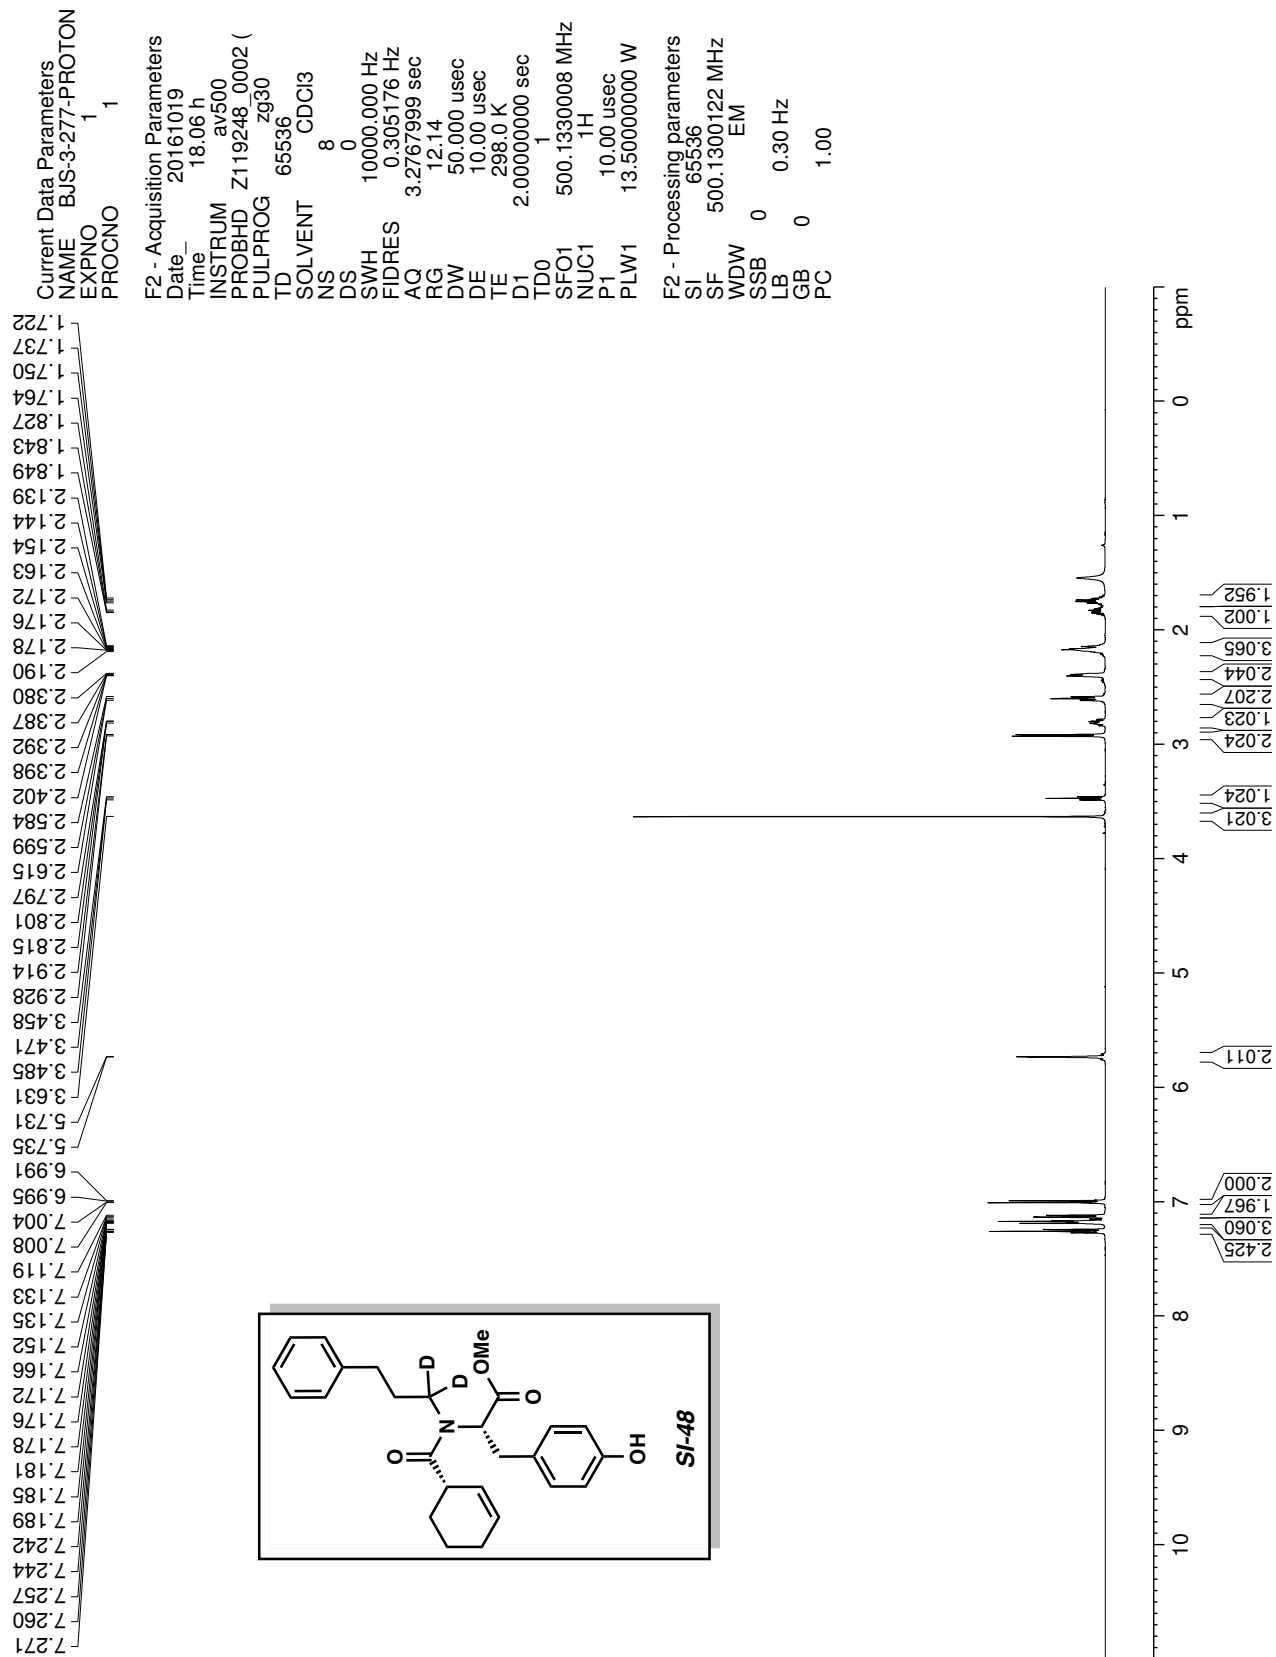



# $^{13}\text{C}$ NMR Spectra

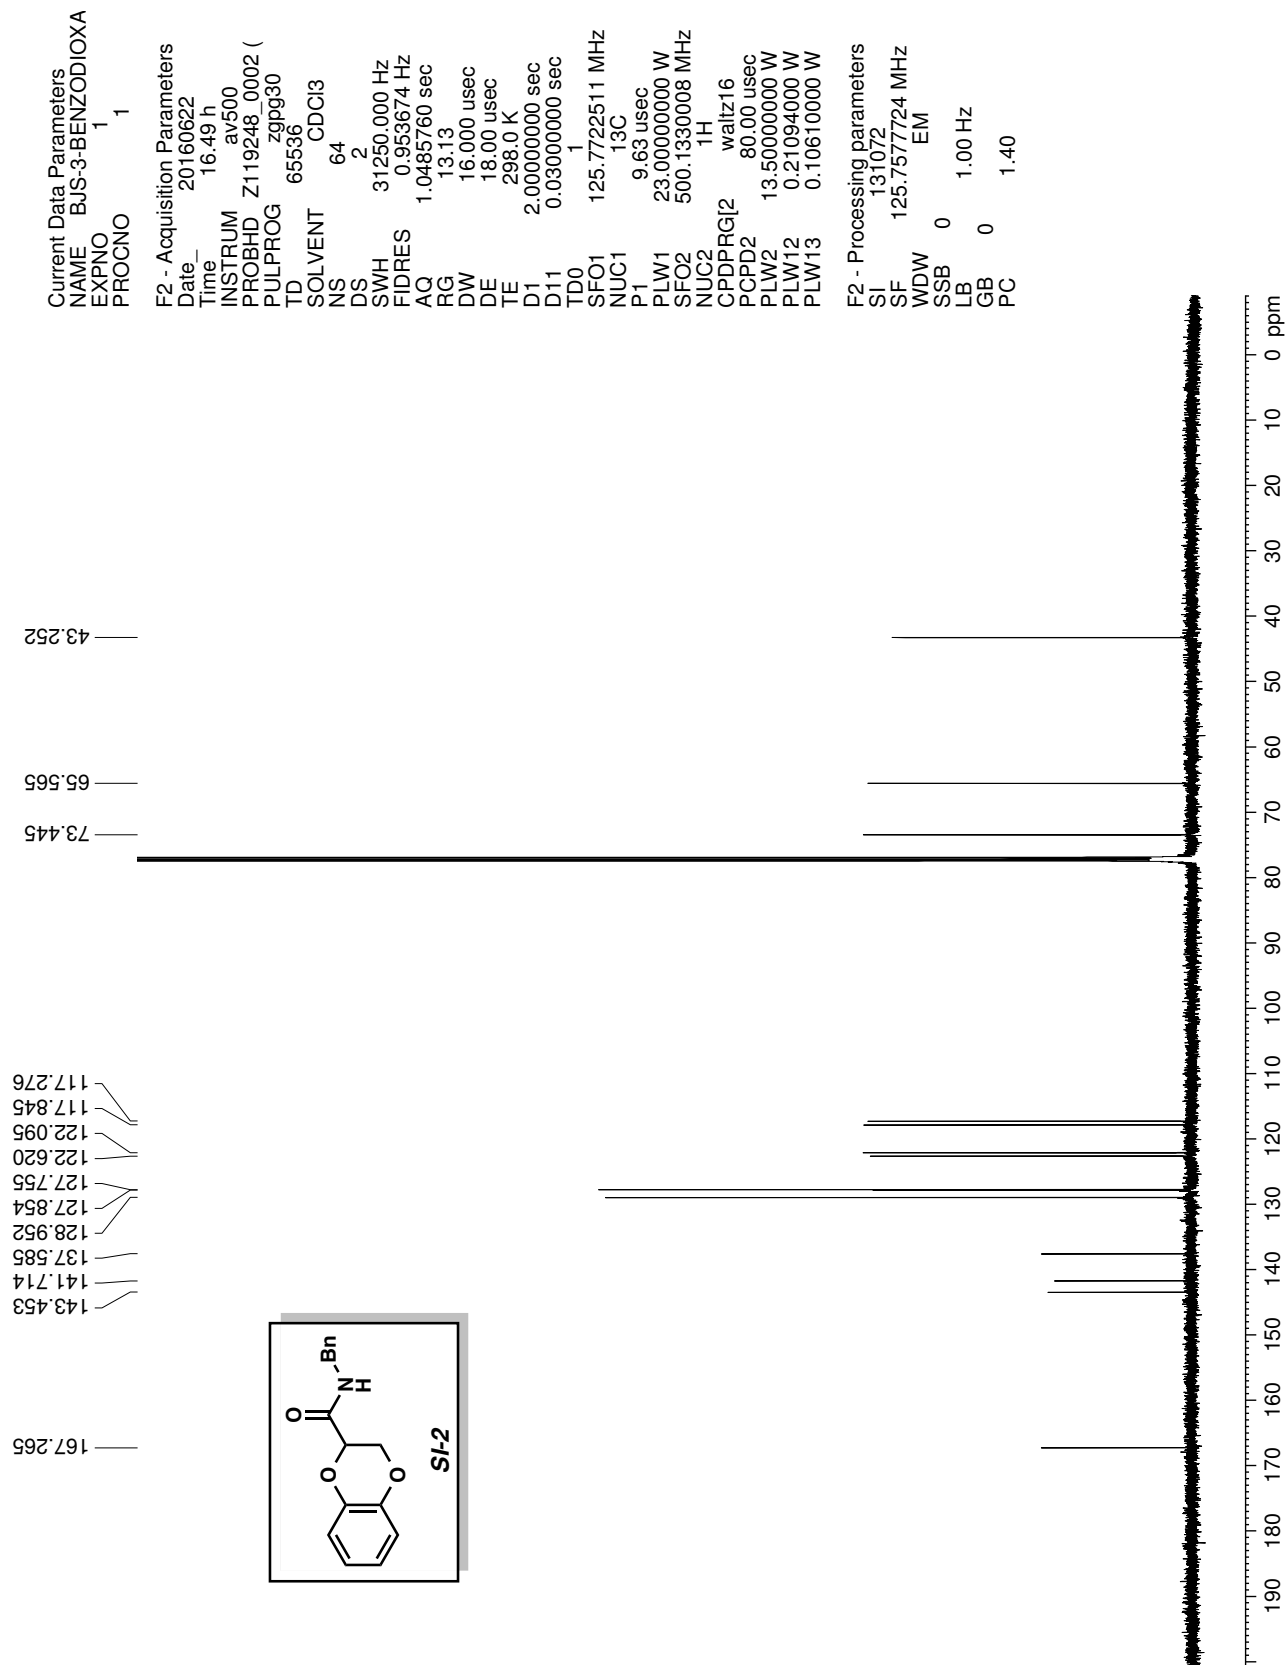

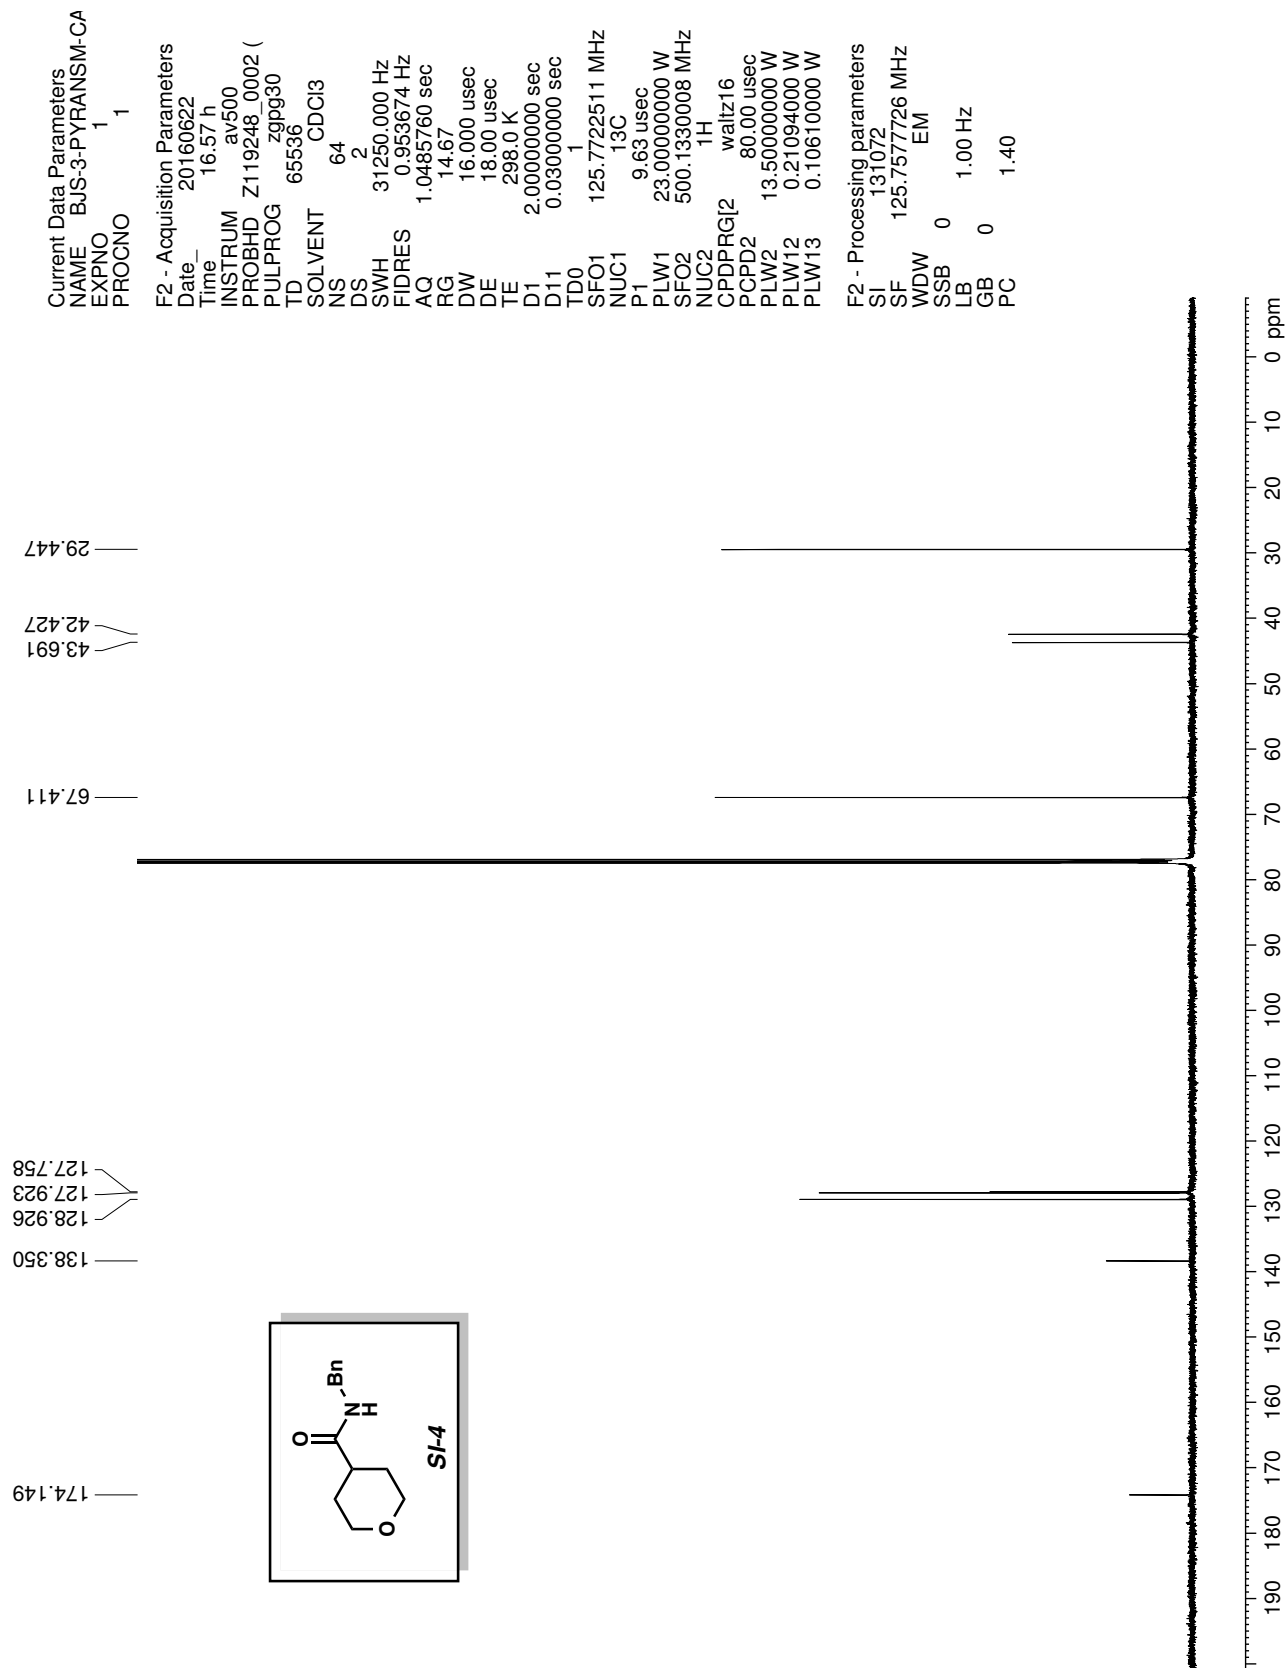

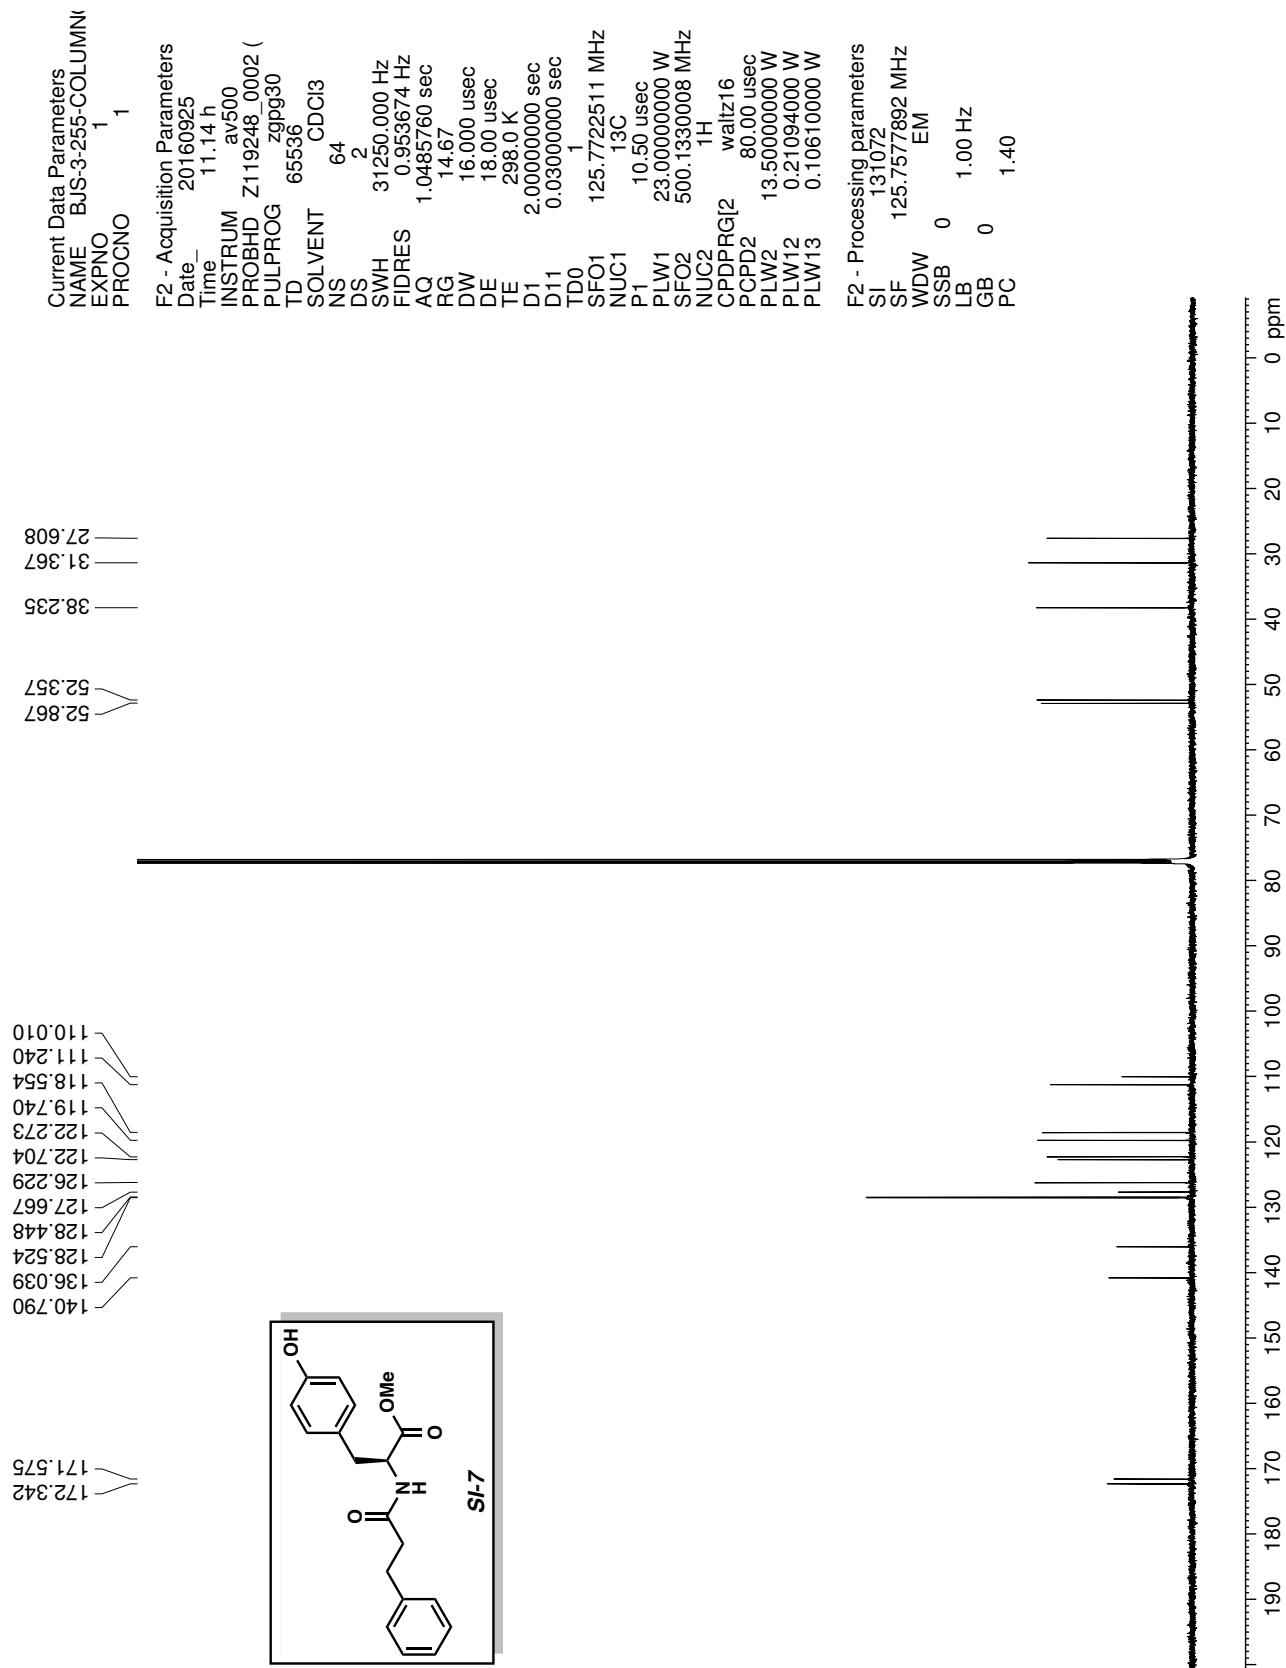

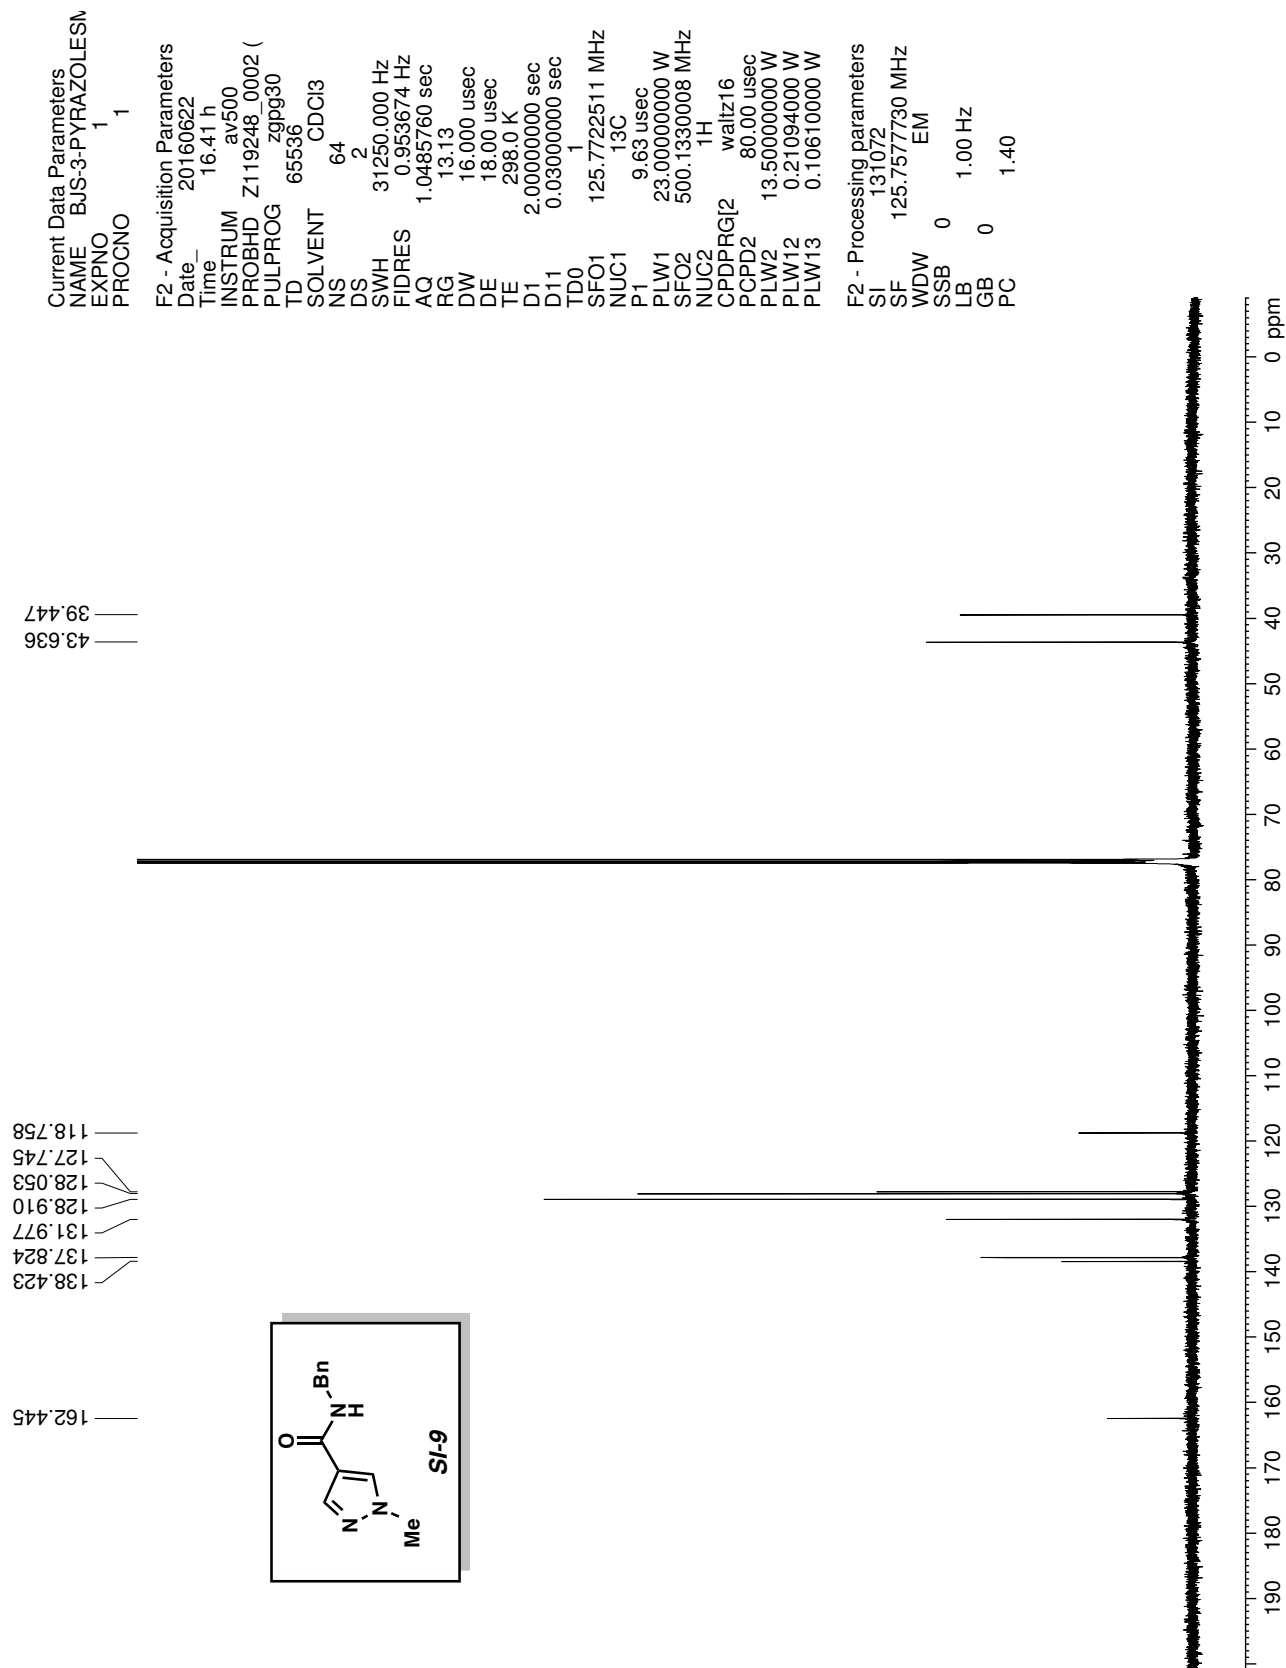

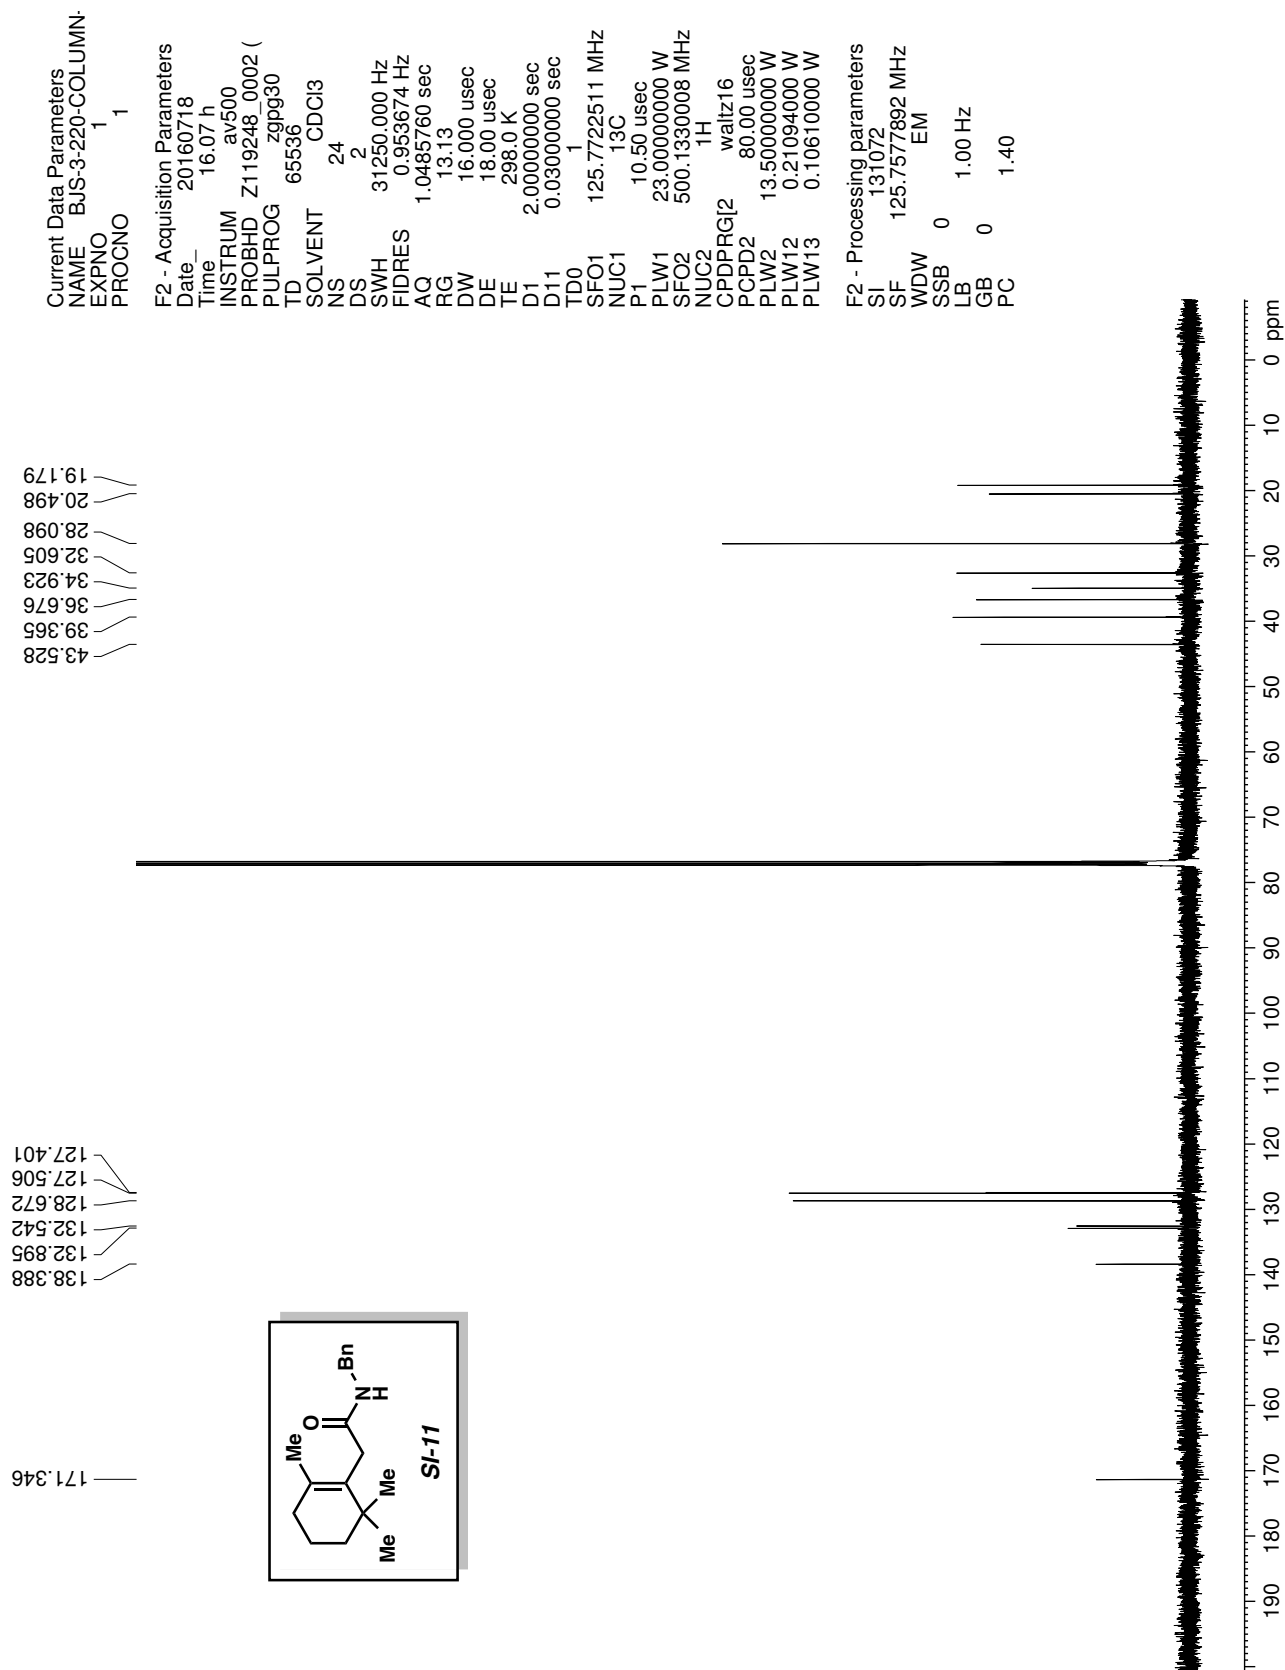

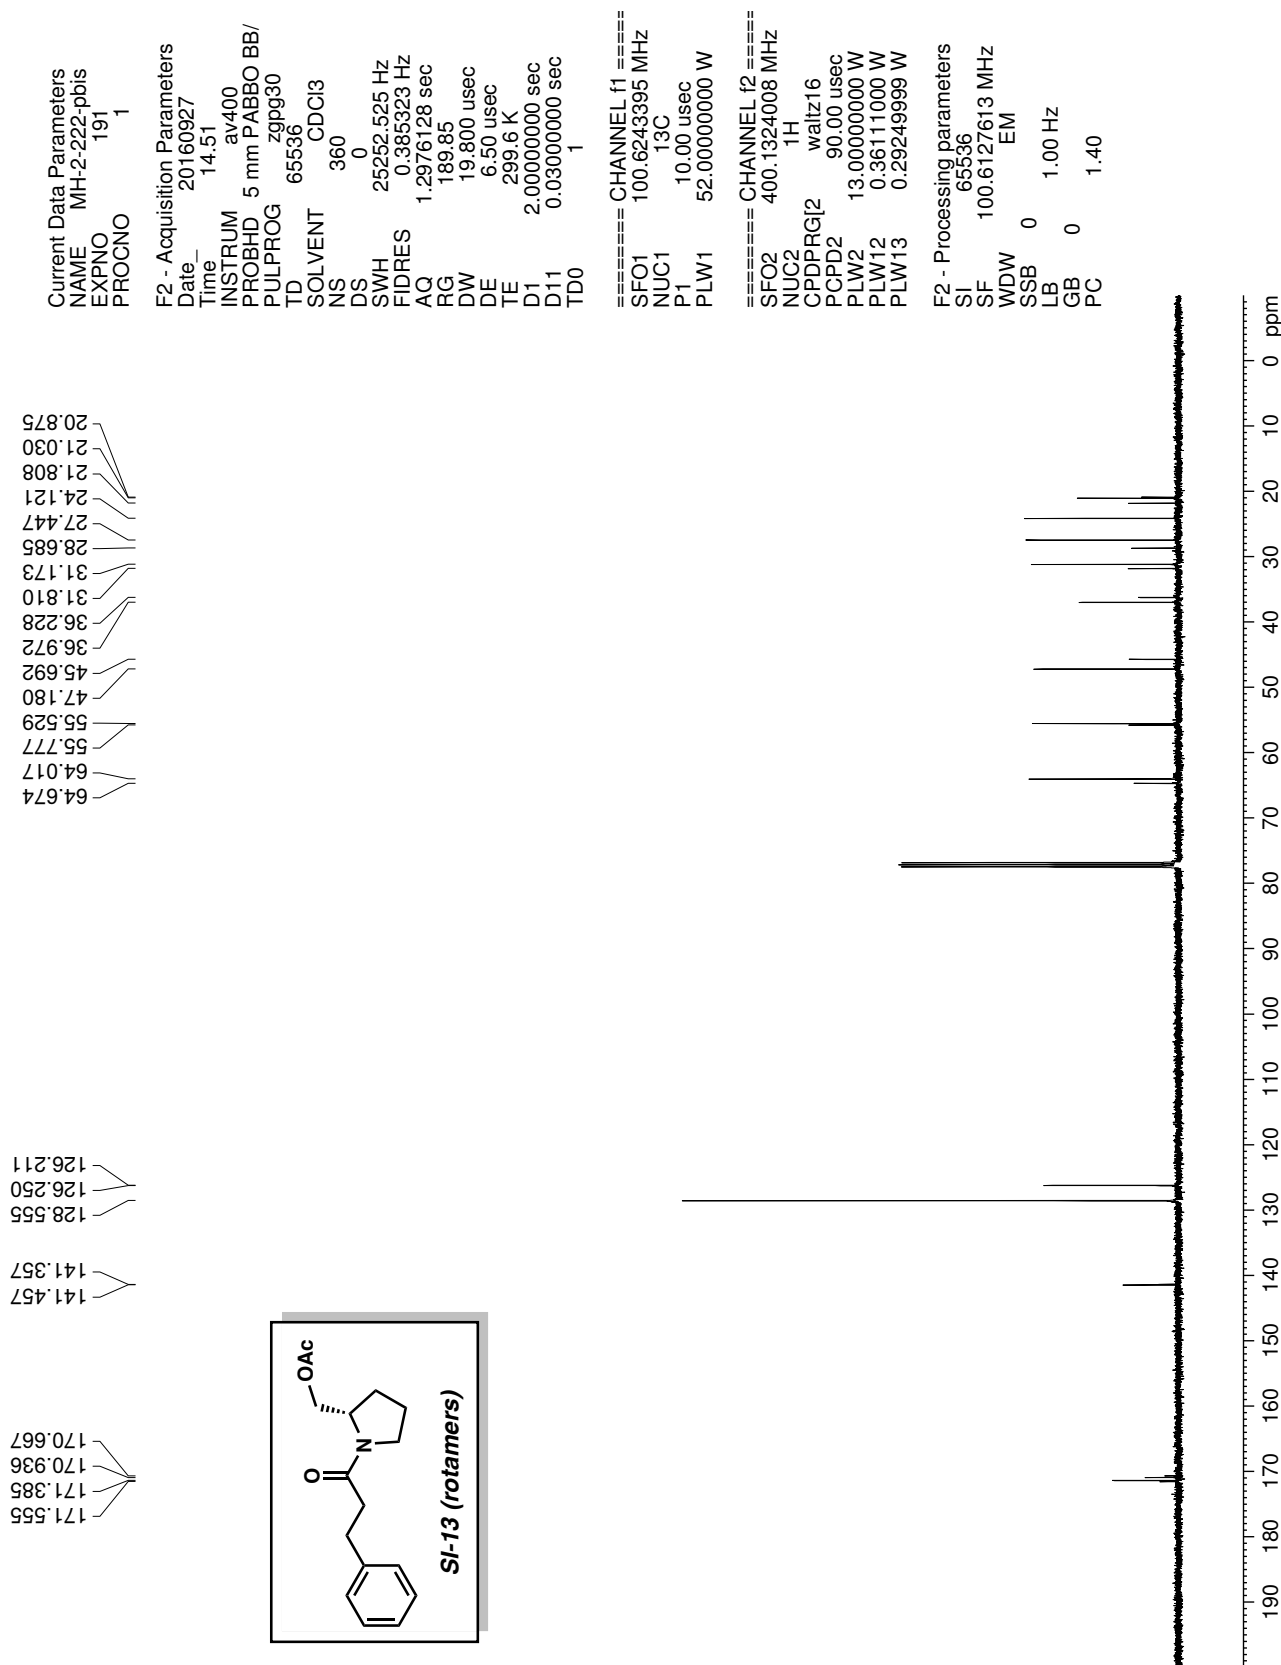

Current Data Parameters  
 NAME MOJ-1-179  
 EXPNO 3  
 PROCNO 1

F2 - Acquisition Parameters  
 Date\_ 20160329  
 Time 9.48 h  
 INSTRUM av500  
 PROBHD Z119248\_0002 (  
 PULPROG zgpg30  
 TD 65536  
 SOLVENT CDCl3  
 NS 120  
 DS 2  
 SWH 31250.000 Hz  
 FIDRES 0.953674 Hz  
 AQ 1.0485760 sec  
 RG 204.54  
 DW 16.000 usec  
 DE 18.00 usec  
 TE 298.0 K  
 D1 2.00000000 sec  
 D11 0.03000000 sec  
 TD0 1  
 SFO1 125.7722511 MHz  
 NUC1 13C  
 P1 9.63 usec  
 PLW1 23.00000000 W  
 SFO2 500.1330008 MHz  
 NUC2 1H  
 CPDPRG[2] waltz16  
 PCPD2 80.00 usec  
 PLW2 13.50000000 W  
 PLW12 0.21094000 W  
 PLW13 0.10610000 W

F2 - Processing parameters  
 SI 131072  
 SF 125.7577892 MHz  
 WDW EM  
 SSB 0  
 LB 1.00 Hz  
 GB 0  
 PC 1.40

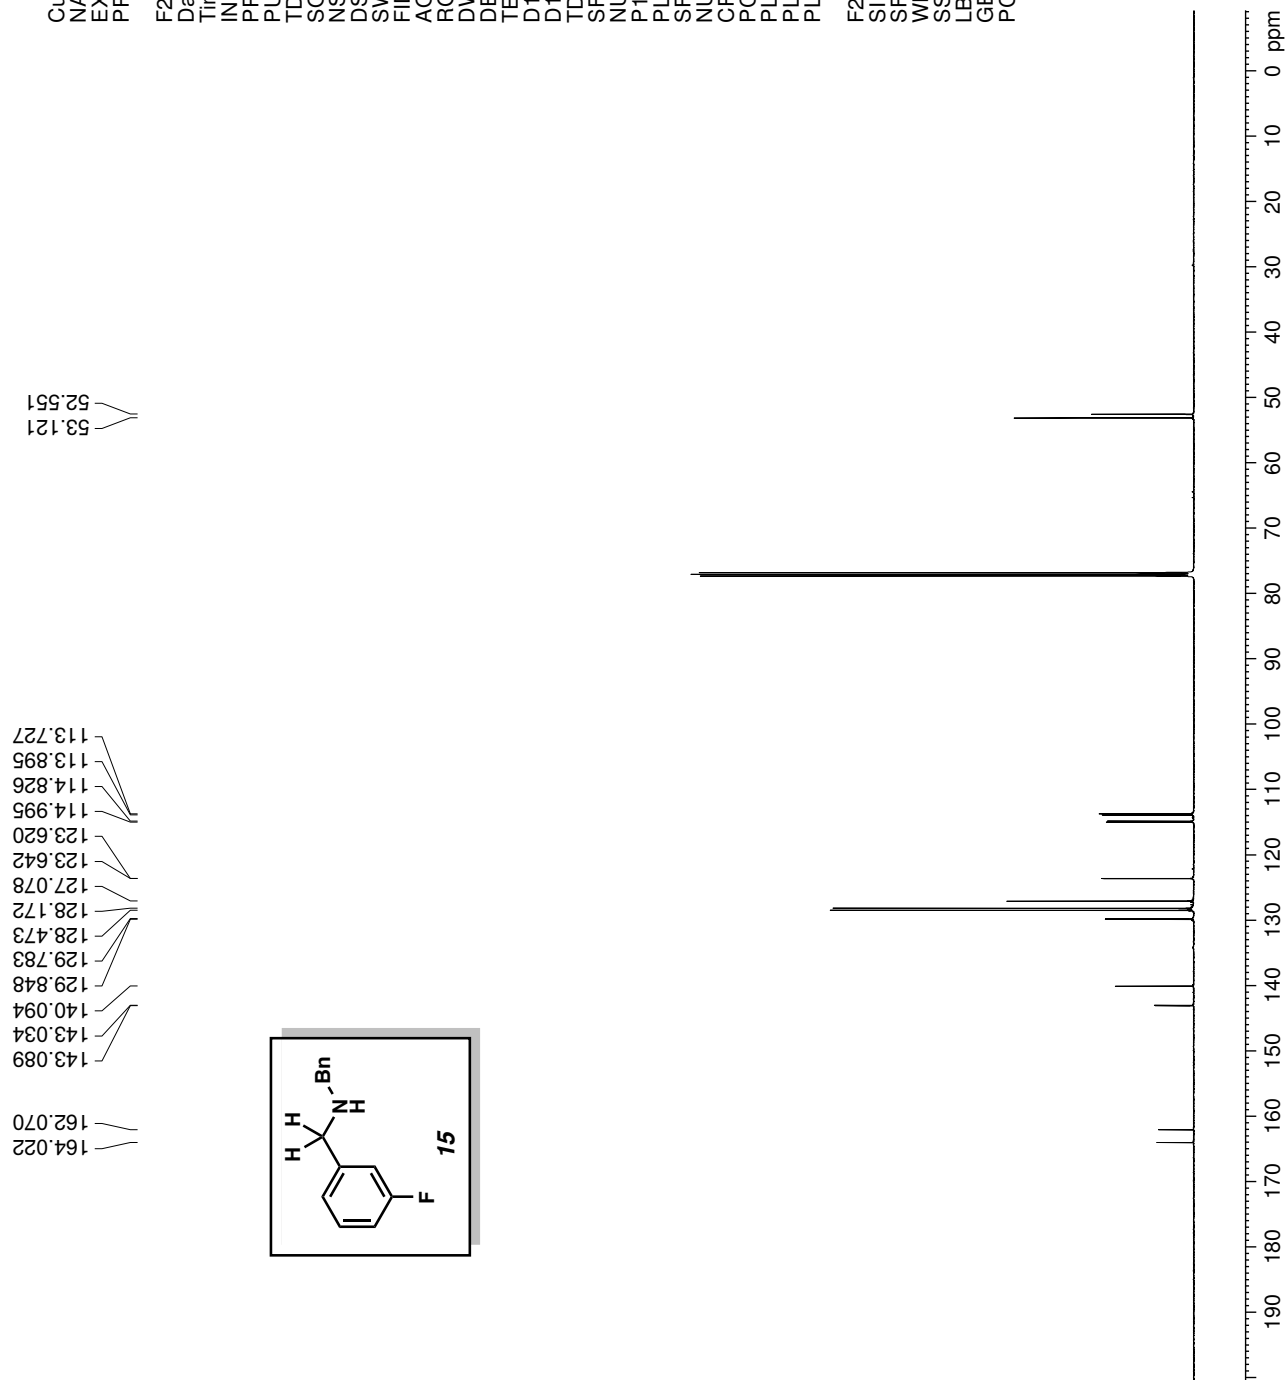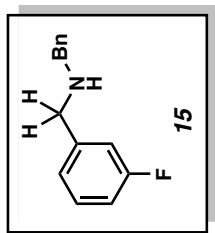



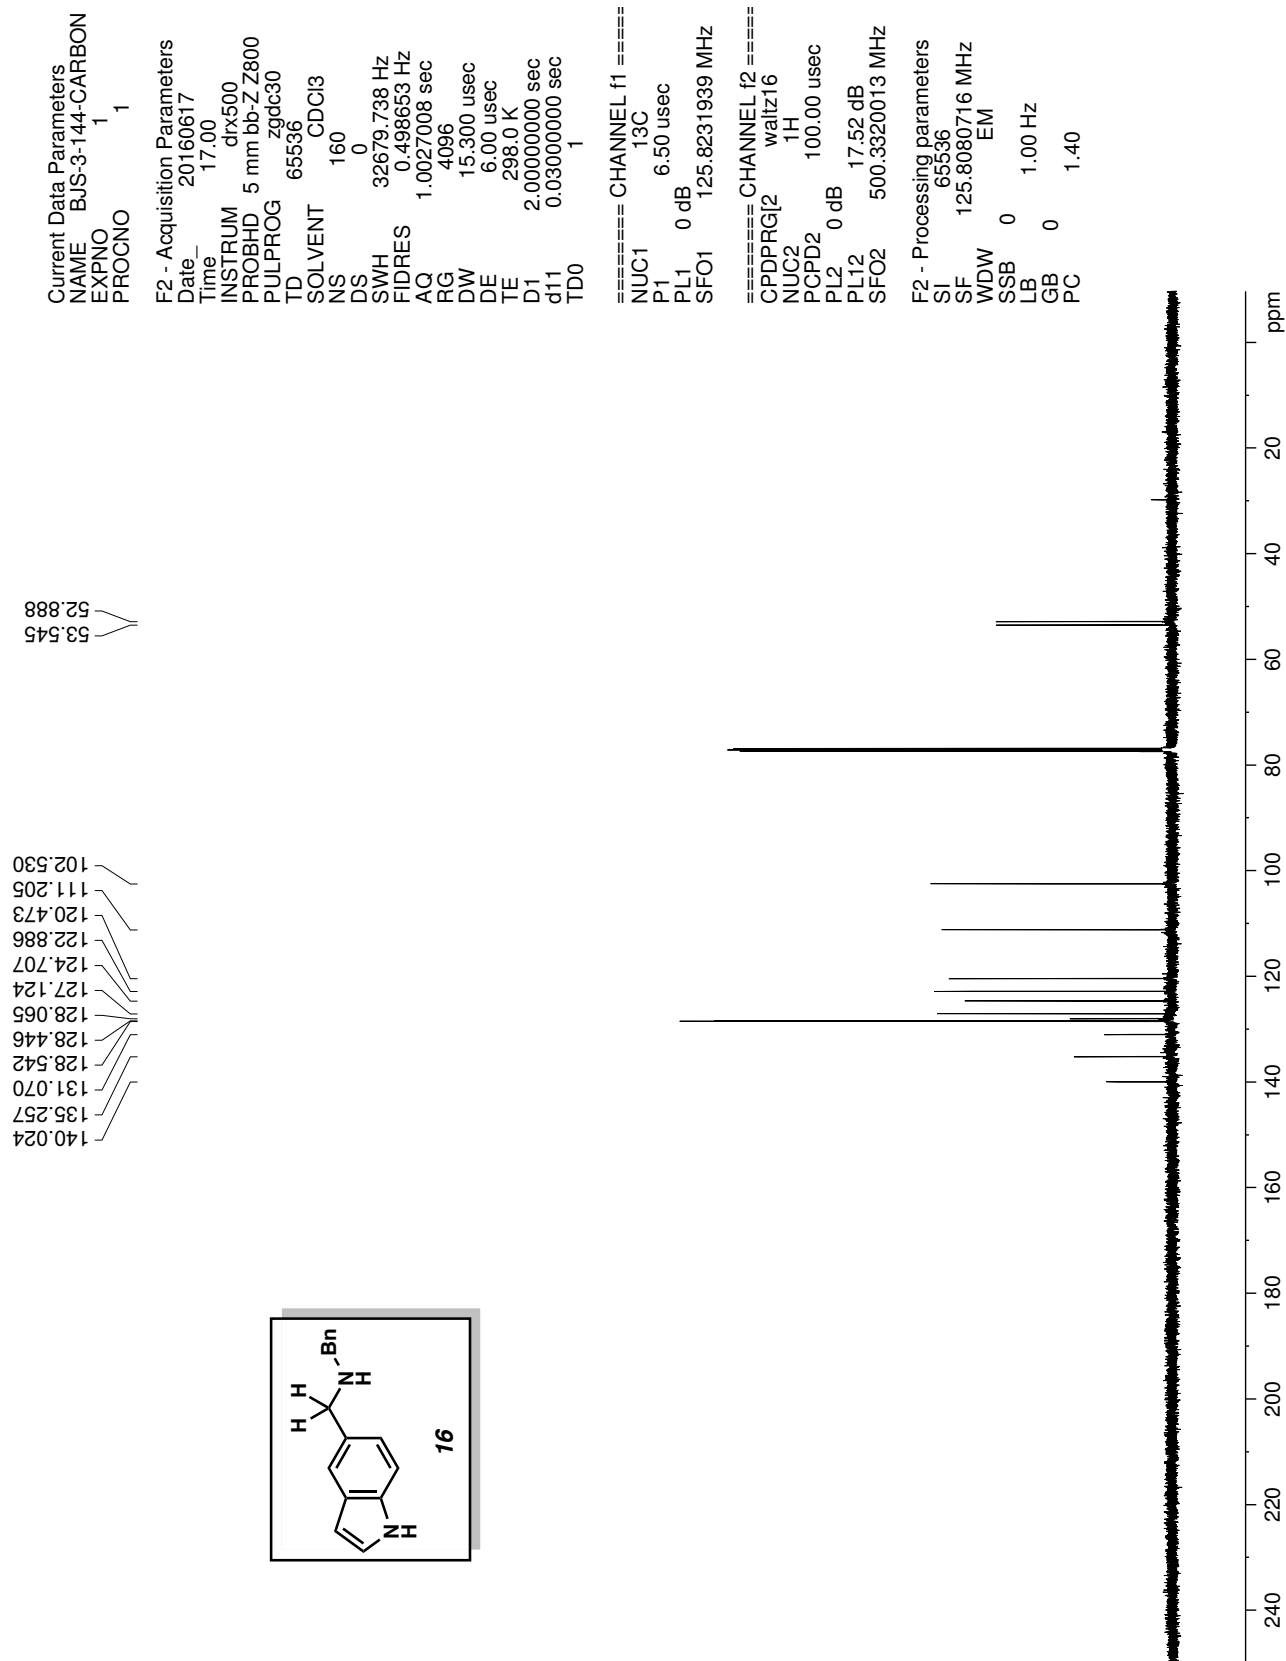

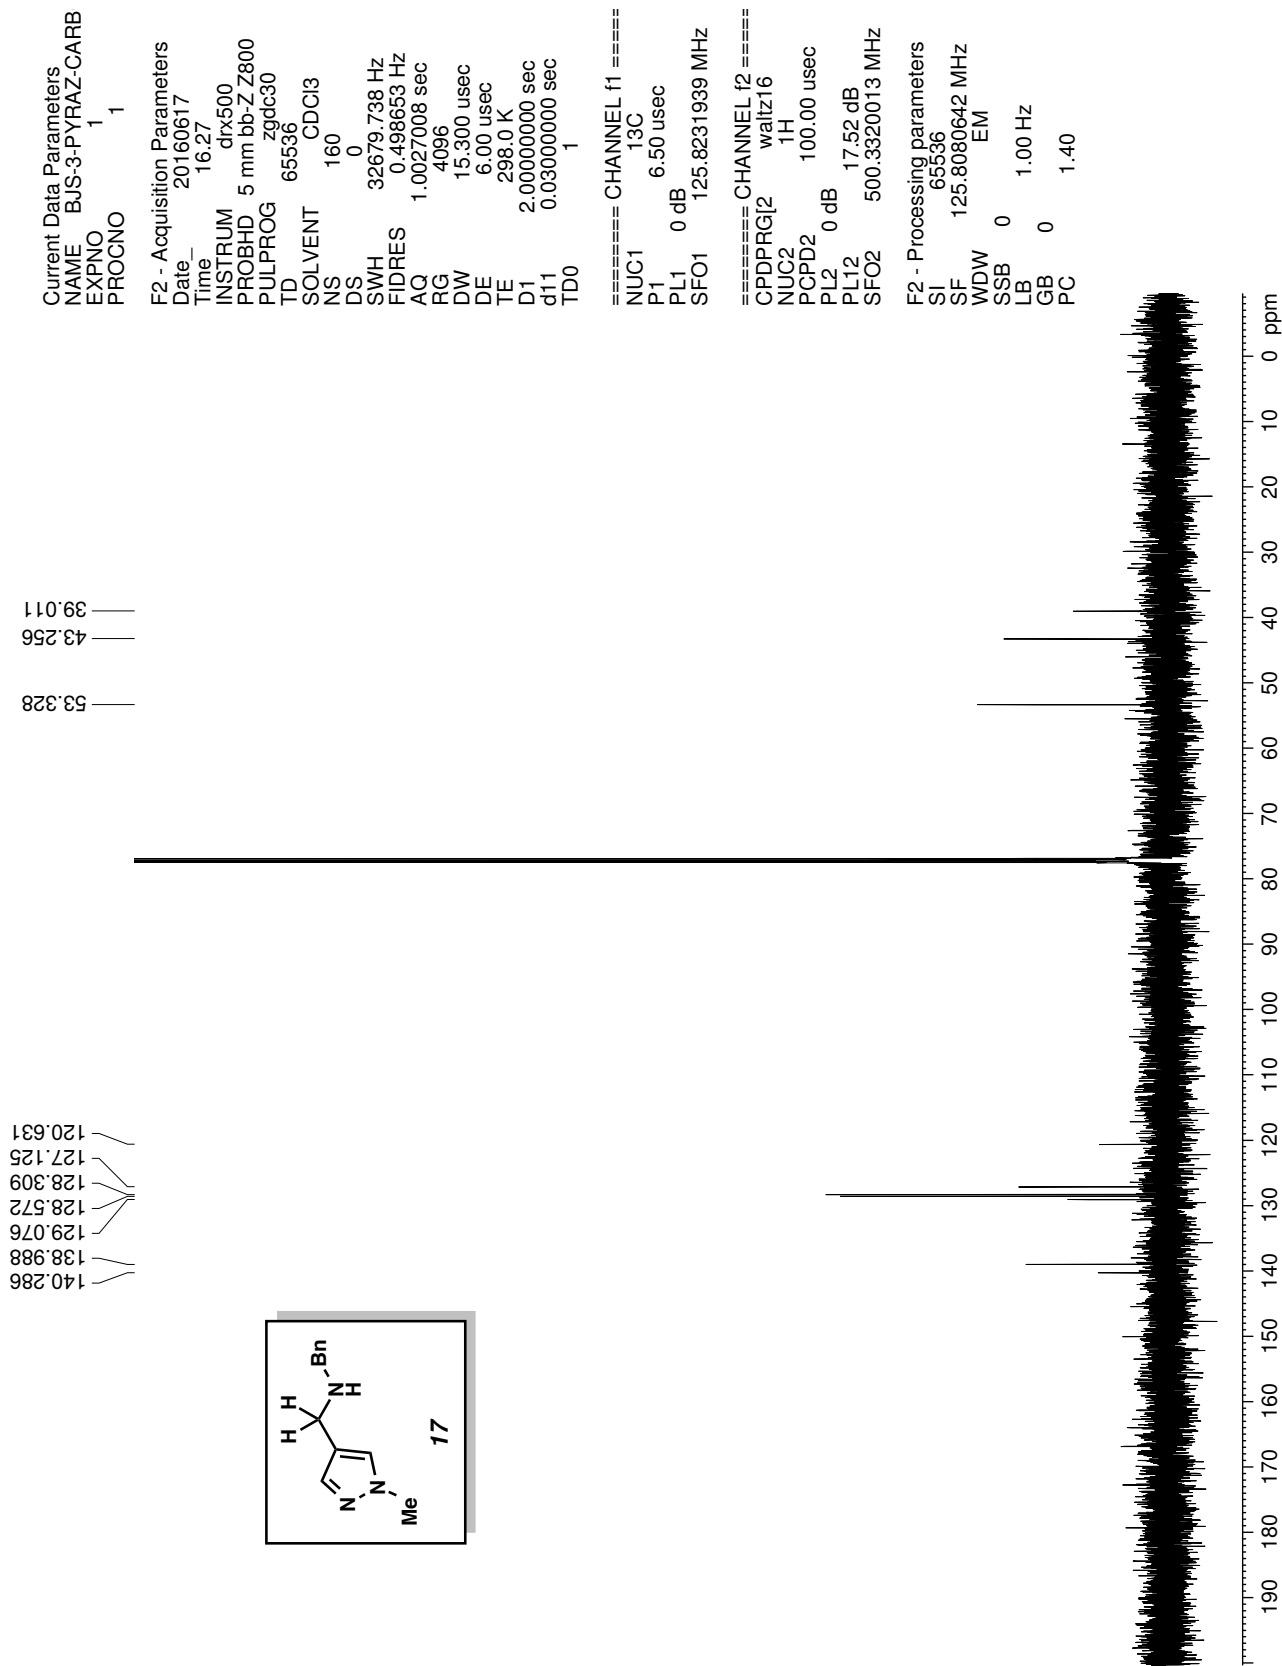

Current Data Parameters  
 NAME BJS-3-232-PREPCAF  
 EXPNO 1  
 PROCNO 1

F2 - Acquisition Parameters  
 Date\_ 20160802  
 Time 9.03 h  
 INSTRUM av500  
 PROBHD Z119248\_0002 (  
 PULPROG zgpg30  
 TD 65536  
 SOLVENT CDCI3  
 NS 64  
 DS 2  
 SWH 31250.000 Hz  
 FIDRES 0.953674 Hz  
 AQ 1.0485760 sec  
 RG 14.67  
 DW 16.000 usec  
 DE 18.00 usec  
 TE 298.0 K  
 D1 2.00000000 sec  
 D11 0.03000000 sec  
 TD0 1  
 SFO1 125.772511 MHz  
 NUC1 13C  
 P1 10.50 usec  
 PLW1 23.00000000 W  
 SFO2 500.1330008 MHz  
 NUC2 1H  
 CPDPRG[2] waltz16  
 PCPD2 80.00 usec  
 PLW2 13.50000000 W  
 PLW12 0.21094000 W  
 PLW13 0.10610000 W

F2 - Processing parameters  
 SI 131072  
 SF 125.7577741 MHz  
 WDW EM  
 SSB 0  
 LB 1.00 Hz  
 GB 0  
 PC 1.40

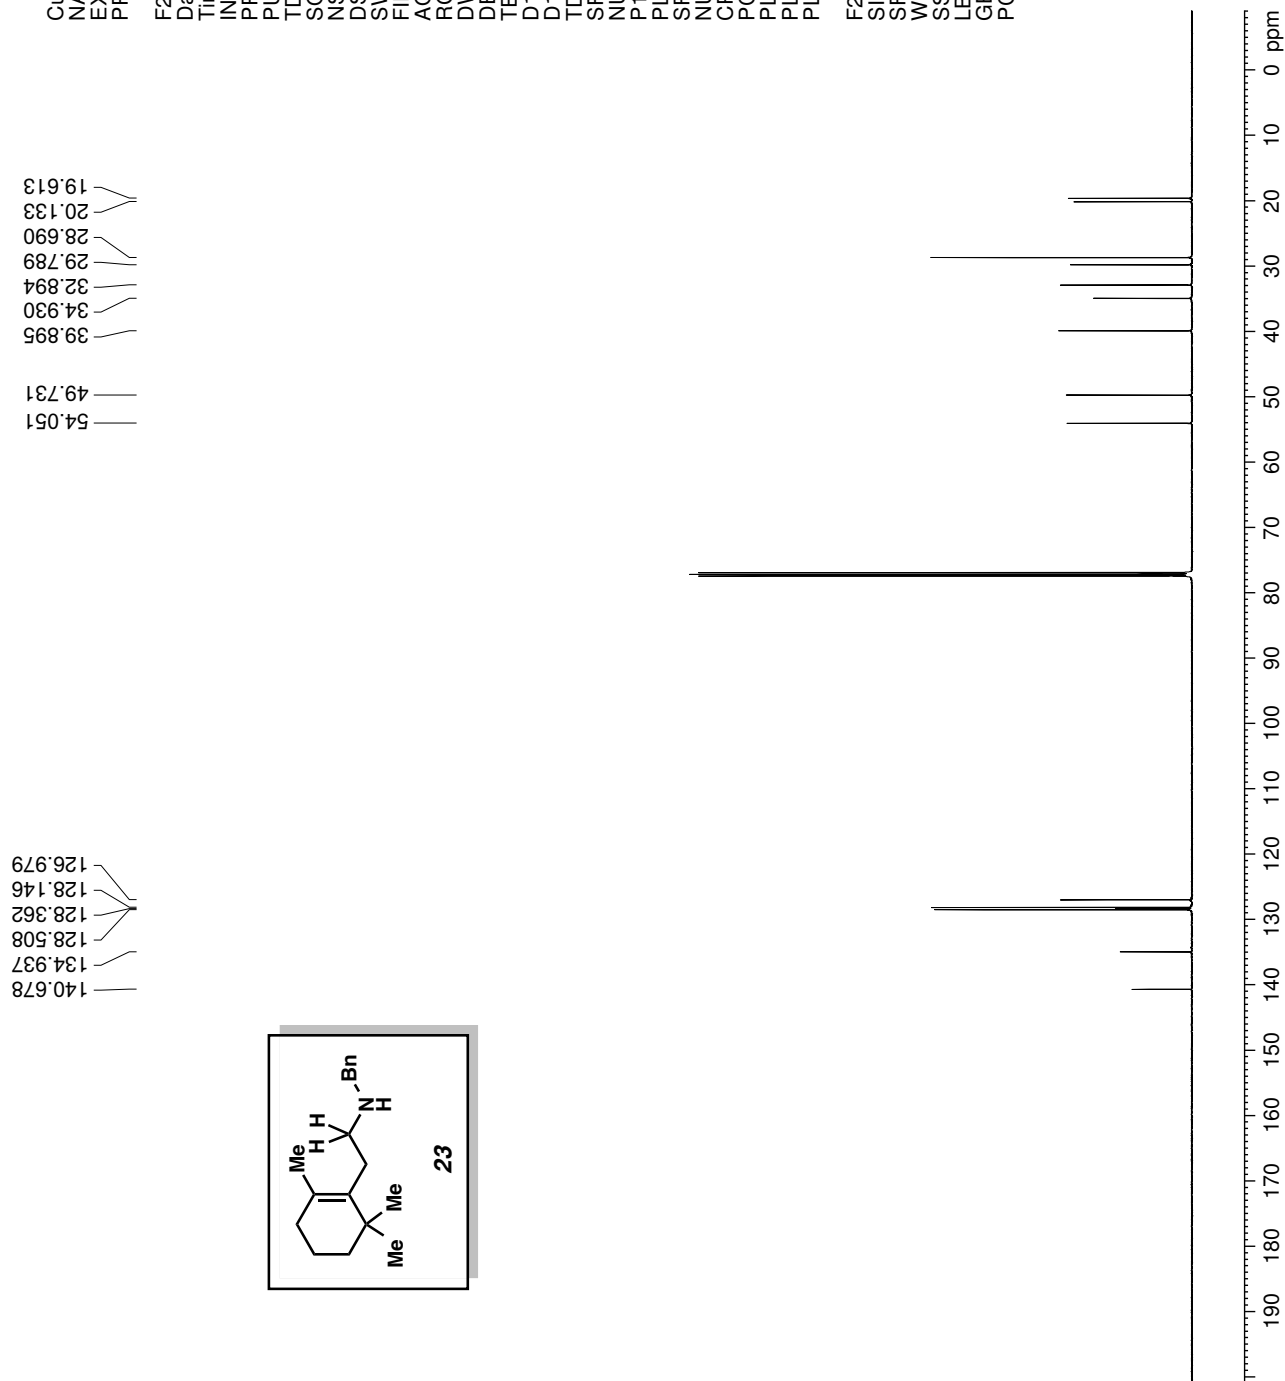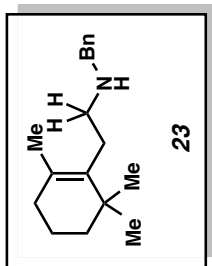

Current Data Parameters  
 NAME BJS-3-146-CARBON  
 EXPNO 1  
 PROCNO 1

F2 - Acquisition Parameters

Date\_ 20160617  
 Time 16.50  
 INSTRUM dx500  
 PROBHD 5 mm bb-Z800  
 PULPROG zgdc30  
 TD 65536  
 SOLVENT CDCI3  
 NS 160  
 DS 0  
 SWH 32679.738 Hz  
 FIDRES 0.498653 Hz  
 AQ 1.0027008 sec  
 RG 4096  
 DW 15.300 usec  
 DE 6.00 usec  
 TE 298.0 K  
 D1 2.0000000 sec  
 d11 0.0300000 sec  
 TD0 1

==== CHANNEL f1 =====  
 NUC1 13C  
 P1 6.50 usec  
 PL1 0 dB  
 SFO1 125.8231939 MHz

==== CHANNEL f2 =====  
 CPDPRGf2 waltz16  
 NUC2 1H  
 PCPD2 100.00 usec  
 PL2 0 dB  
 PL12 17.52 dB  
 SFO2 500.3320013 MHz

F2 - Processing parameters

SI 65536  
 SF 125.8080712 MHz  
 WDW EM  
 SSB 0  
 LB 1.00 Hz  
 GB 0  
 PC 1.40

— 49.329  
 — 54.003  
 — 66.661  
 — 72.710

117.215  
 117.420  
 121.470  
 121.616  
 127.242  
 128.218  
 128.592  
 139.971  
 143.254  
 143.394

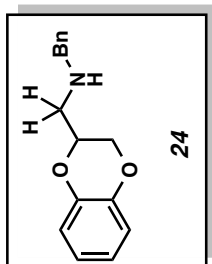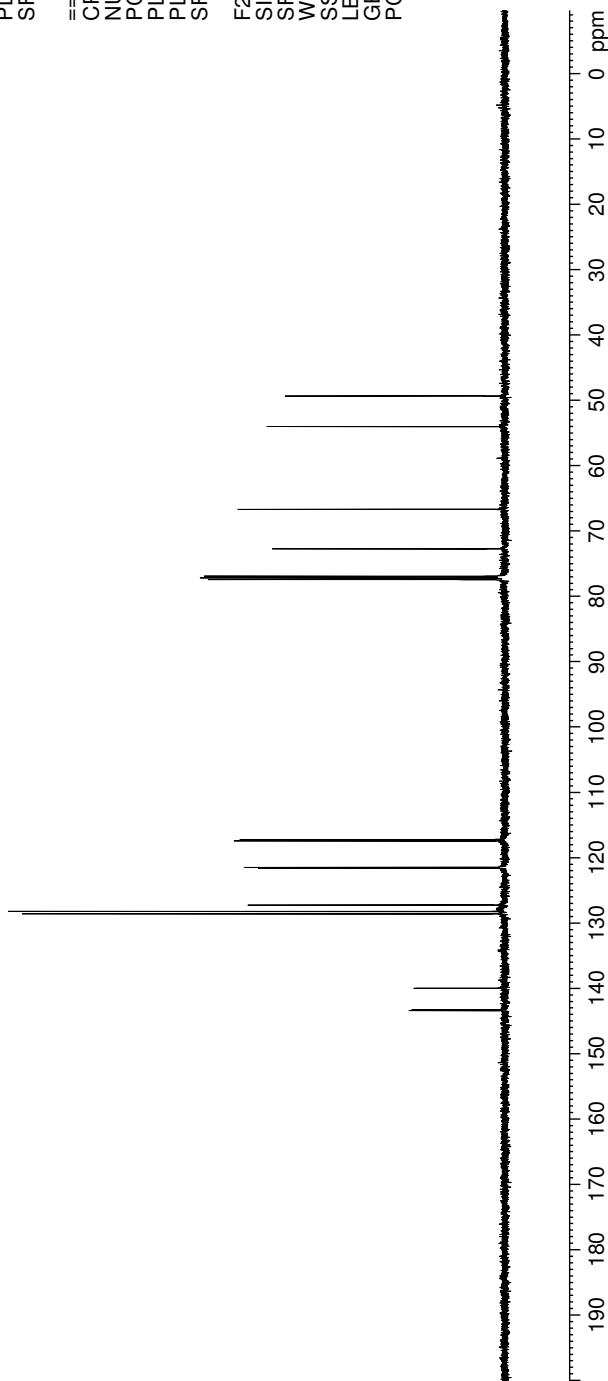

Current Data Parameters  
 NAME BJS-3-119-CARBON  
 EXPNO 1  
 PROCNO 1

F2 - Acquisition Parameters

Date\_ 20160617  
 Time 16.38  
 INSTRUM dx500  
 PROBHD 5 mm bb-Z800  
 PULPROG zgdc30  
 TD 65536  
 SOLVENT CDCI3  
 NS 160  
 DS 0  
 SWH 32679.738 Hz  
 FIDRES 0.498653 Hz  
 AQ 1.0027008 sec  
 RG 4096  
 DW 15.300 usec  
 DE 6.00 usec  
 TE 298.0 K  
 D1 2.00000000 sec  
 d11 0.03000000 sec  
 TD0 1

==== CHANNEL f1 =====  
 NUC1 13C  
 P1 6.50 usec  
 PL1 0 dB  
 SFO1 125.8231939 MHz

==== CHANNEL f2 =====  
 CPDPRGf2 waltz16  
 NUC2 1H  
 PCPD2 100.00 usec  
 PL2 0 dB  
 PL12 17.52 dB  
 SFO2 500.3320013 MHz

F2 - Processing parameters

SI 65536  
 SF 125.8080701 MHz  
 WDW EM  
 SSB 0  
 LB 1.00 Hz  
 GB 0  
 PC 1.40

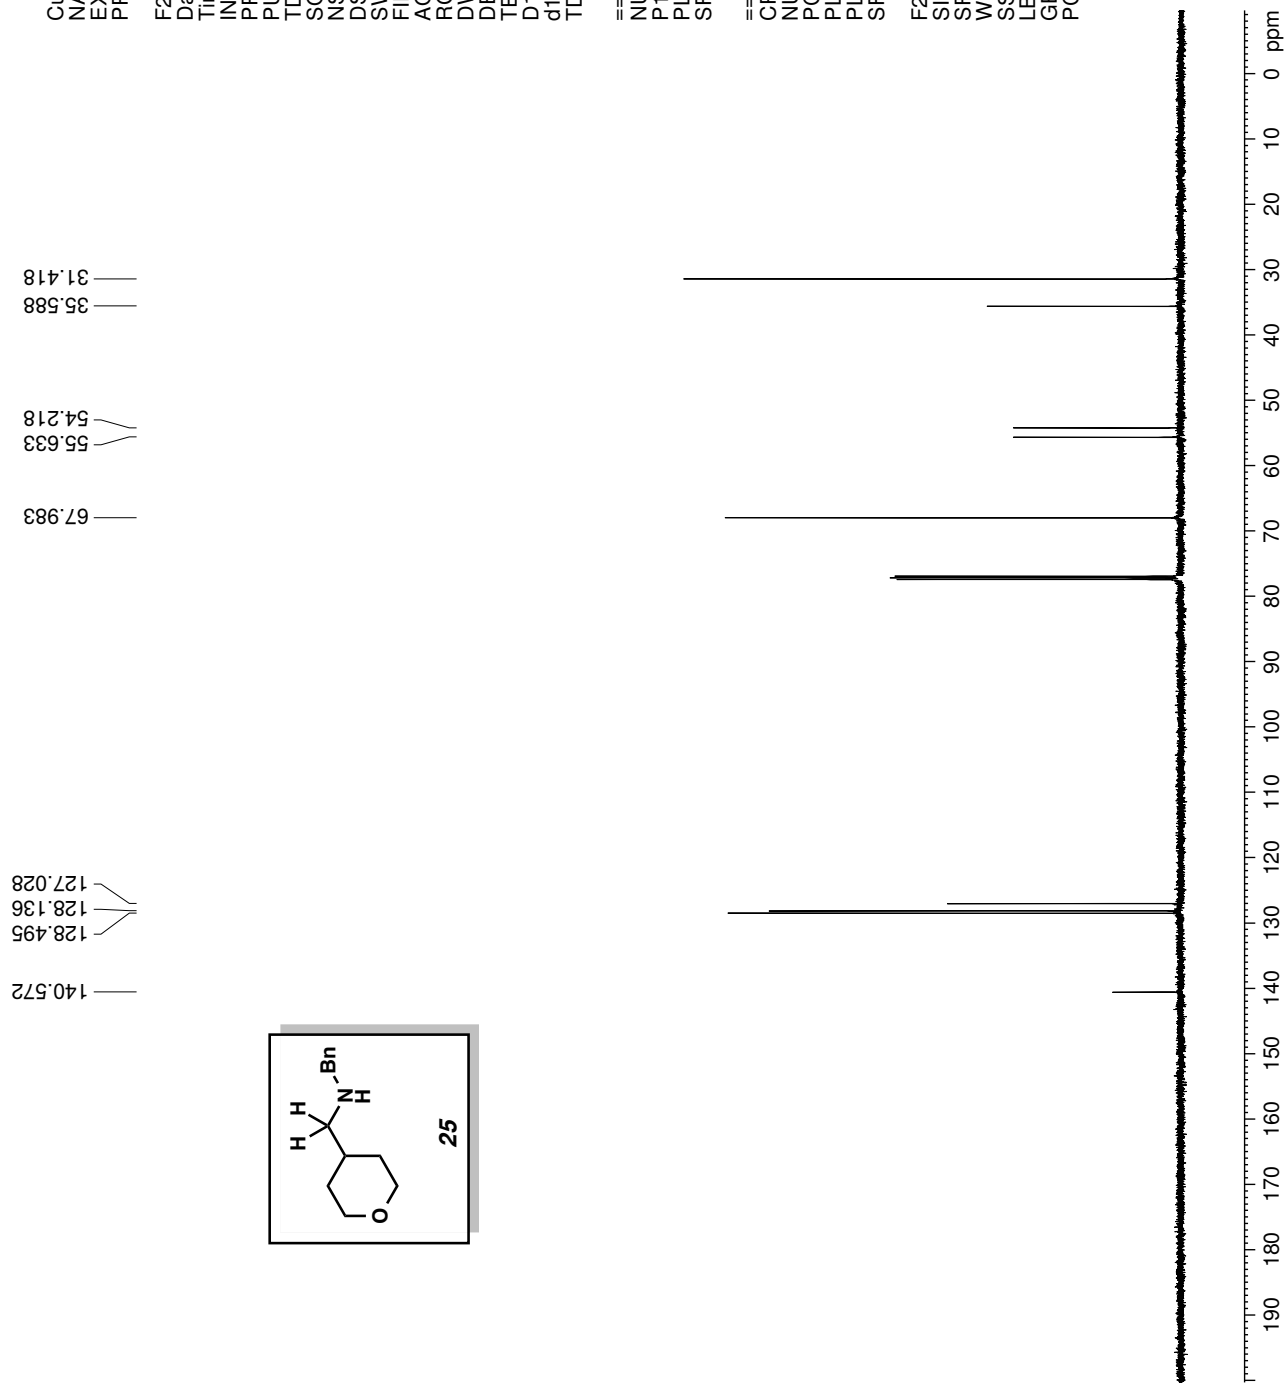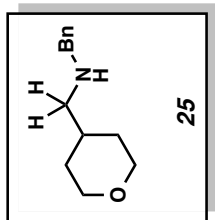

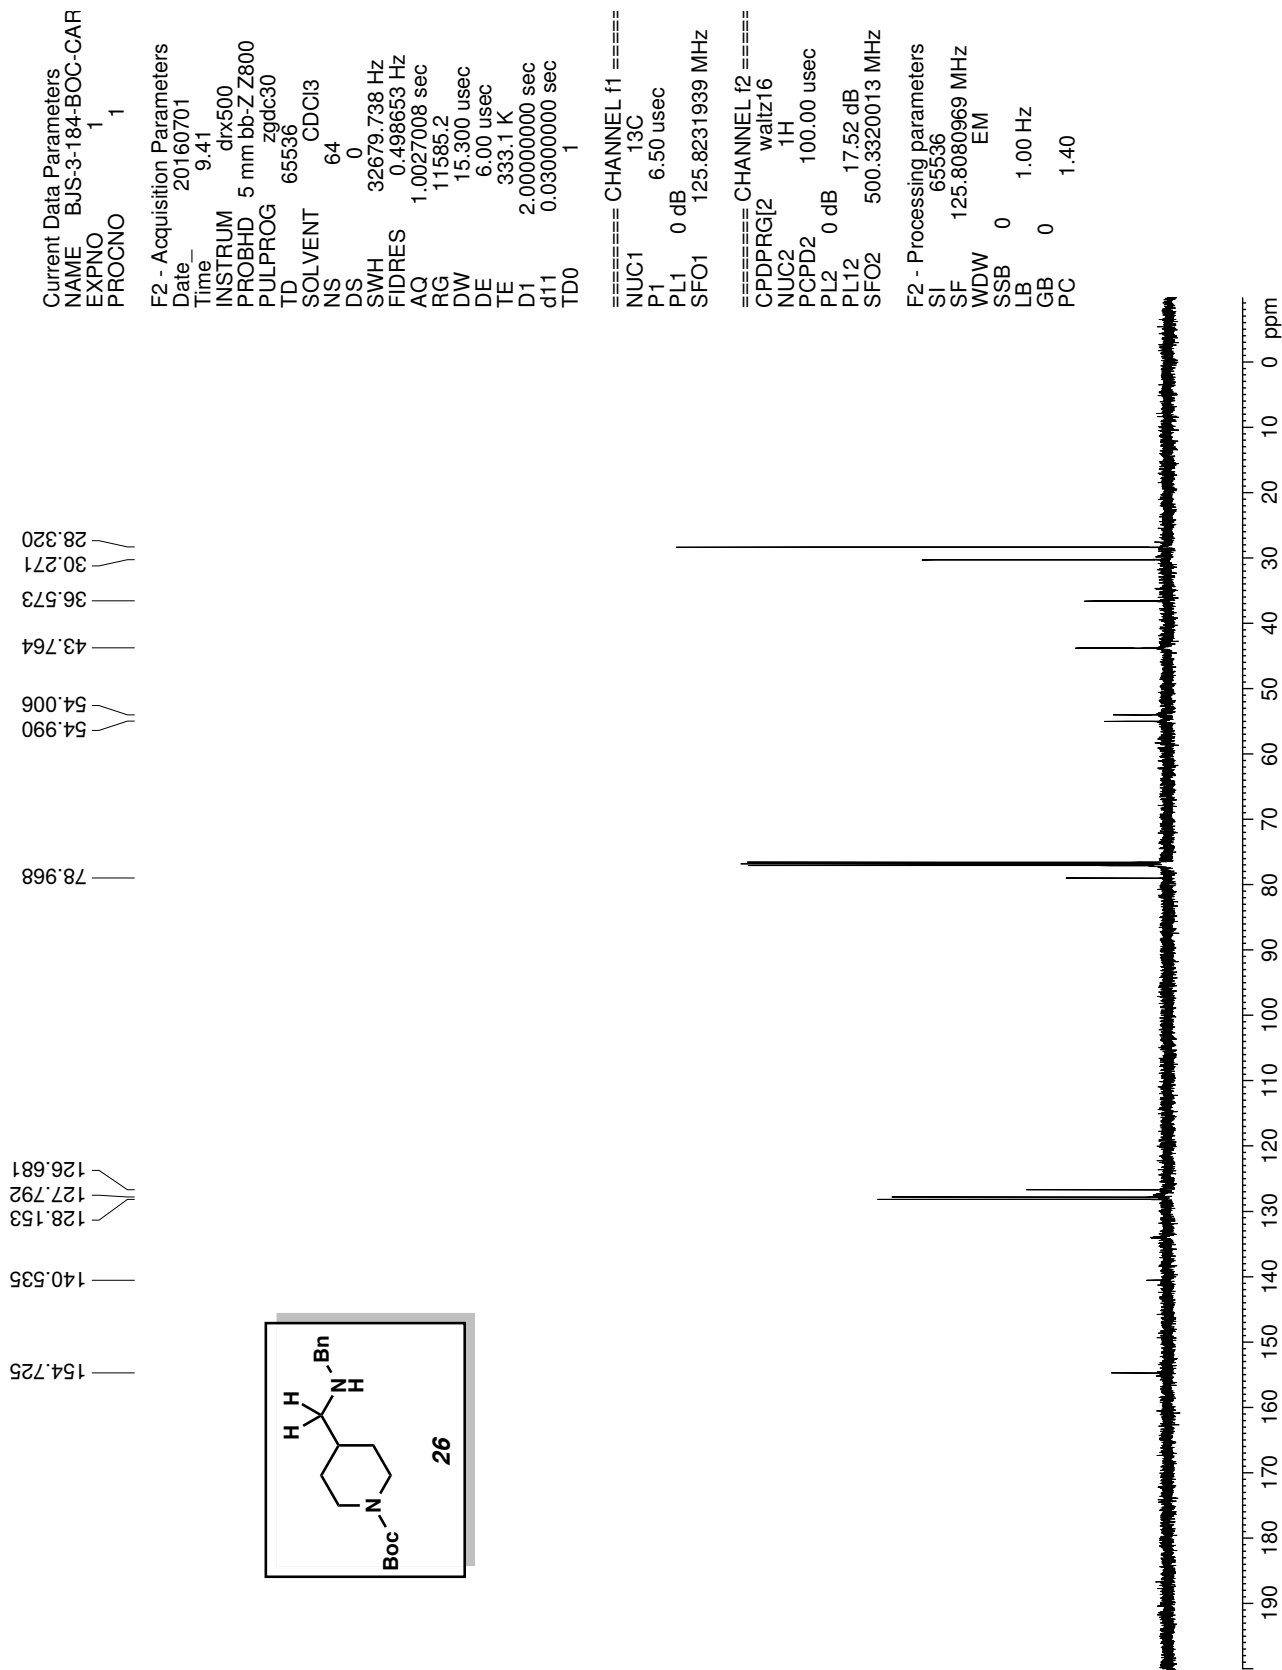

Current Data Parameters  
 NAME BJS-3-214-PURE-CA  
 EXPNO 1  
 PROCNO 1

F2 - Acquisition Parameters

Date\_ 20160711  
 Time 16.49 h  
 INSTRUM av500  
 PROBHD Z119248\_0002 (PULPROG zgpg30)  
 TD 65536  
 SOLVENT CDCl3  
 NS 64  
 DS 2  
 SWH 31250.000 Hz  
 FIDRES 0.953674 Hz  
 AQ 1.0485760 sec  
 RG 10.71  
 DW 16.000 usec  
 DE 18.00 usec  
 TE 298.0 K  
 D1 2.00000000 sec  
 D11 0.03000000 sec  
 TD0 1  
 SFO1 125.772511 MHz  
 NUC1 13C  
 P1 9.63 usec  
 PLW1 23.00000000 W  
 SFO2 500.1330008 MHz  
 NUC2 1H  
 CPDPRG[2] waltz16  
 PCPD2 80.00 usec  
 PLW2 13.50000000 W  
 PLW12 0.21094000 W  
 PLW13 0.10610000 W

F2 - Processing parameters  
 SI 131072  
 SF 125.7577760 MHz  
 WDW EM  
 SSB 0  
 LB 1.00 Hz  
 GB 0  
 PC 1.40

55.992  
 54.252  
 46.616  
 36.812  
 31.871

140.650  
 128.485  
 128.157  
 126.991

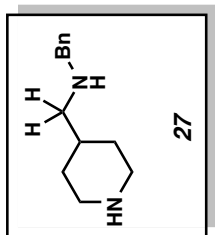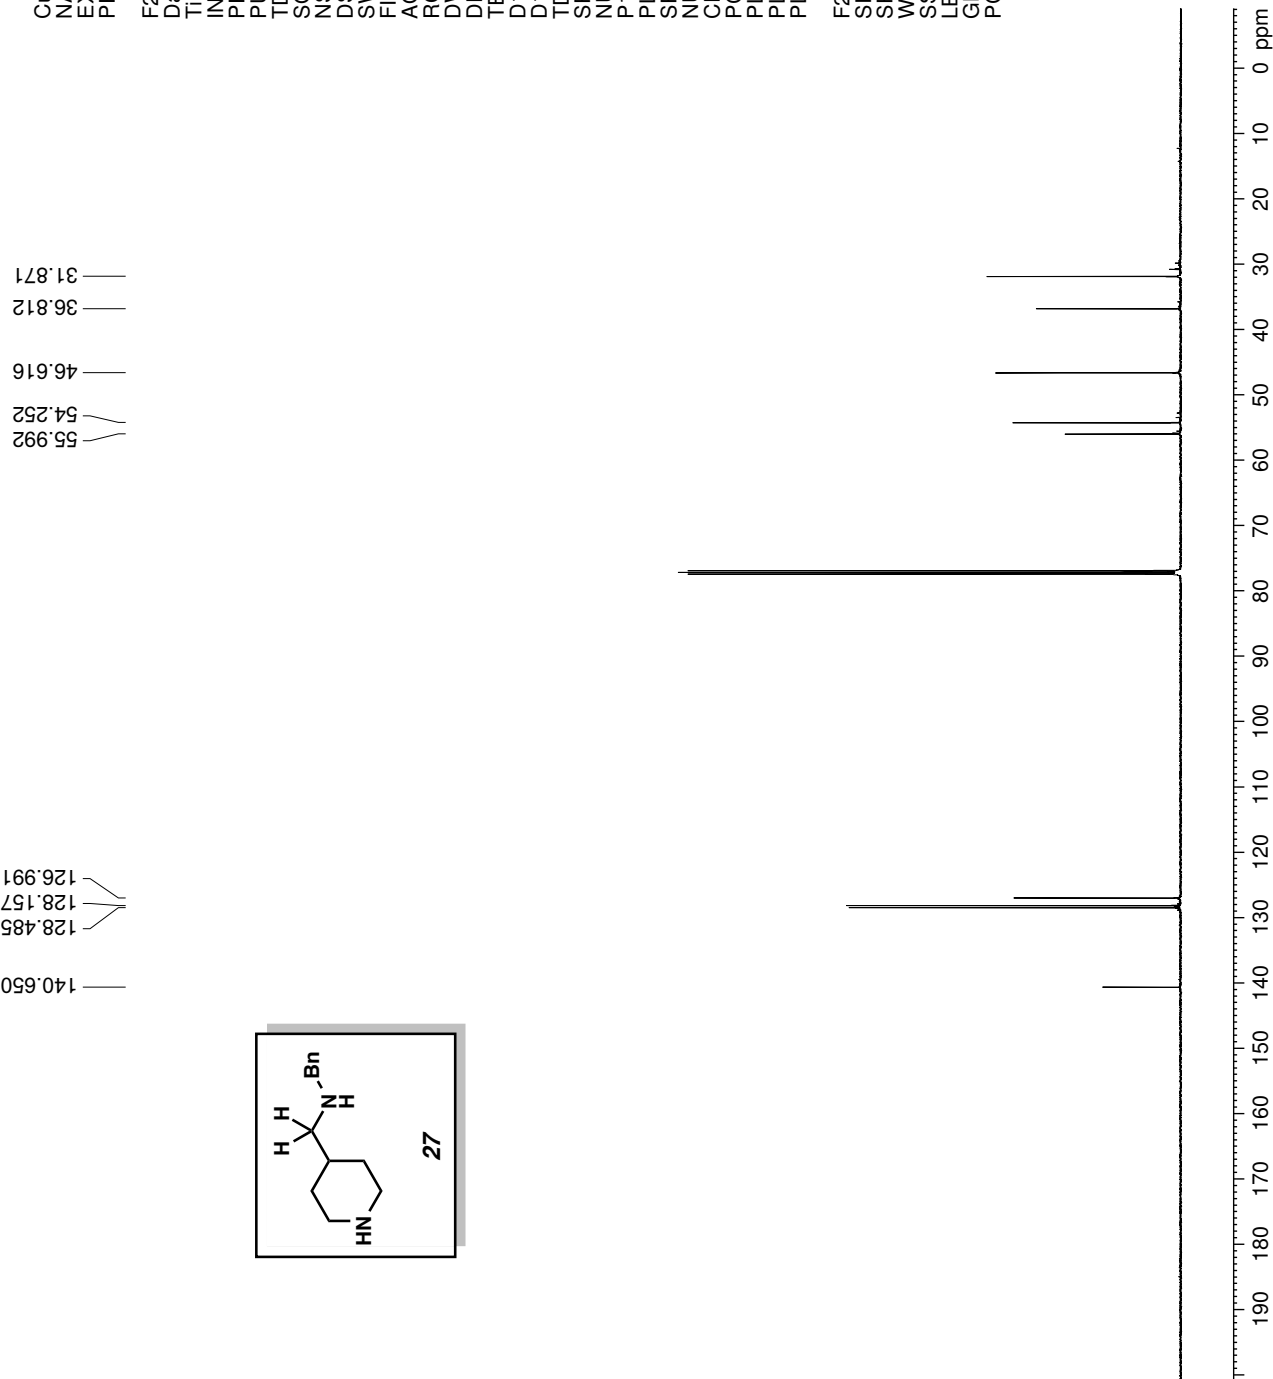

Current Data Parameters  
 NAME BJS-3-263-CARBON:  
 EXPNO 1  
 PROCNO 1

F2 - Acquisition Parameters

Date\_ 20161027  
 Time 13.36 h  
 INSTRUM av500  
 PROBHD Z119248\_0002 (  
 PULPROG zgpg30  
 TD 65536  
 SOLVENT CDCl3  
 NS 240  
 DS 2  
 SWH 31250.000 Hz  
 FIDRES 0.953674 Hz  
 AQ 1.0485760 sec  
 RG 17.16  
 DW 16.000 usec  
 DE 18.00 usec  
 TE 298.0 K  
 D1 2.0000000 sec  
 D11 0.03000000 sec  
 TD0 1  
 SFO1 125.772511 MHz  
 NUC1 13C  
 P1 10.50 usec  
 PLW1 23.00000000 W  
 SFO2 500.1330008 MHz  
 NUC2 1H  
 CPDPRG[2] waltz16  
 PCPD2 80.00 usec  
 PLW2 13.50000000 W  
 PLW12 0.21094000 W  
 PLW13 0.10610000 W

F2 - Processing parameters

SI 131072  
 SF 125.7577727 MHz  
 WDW EM  
 SSB 0  
 LB 1.00 Hz  
 GB 0  
 PC 1.40

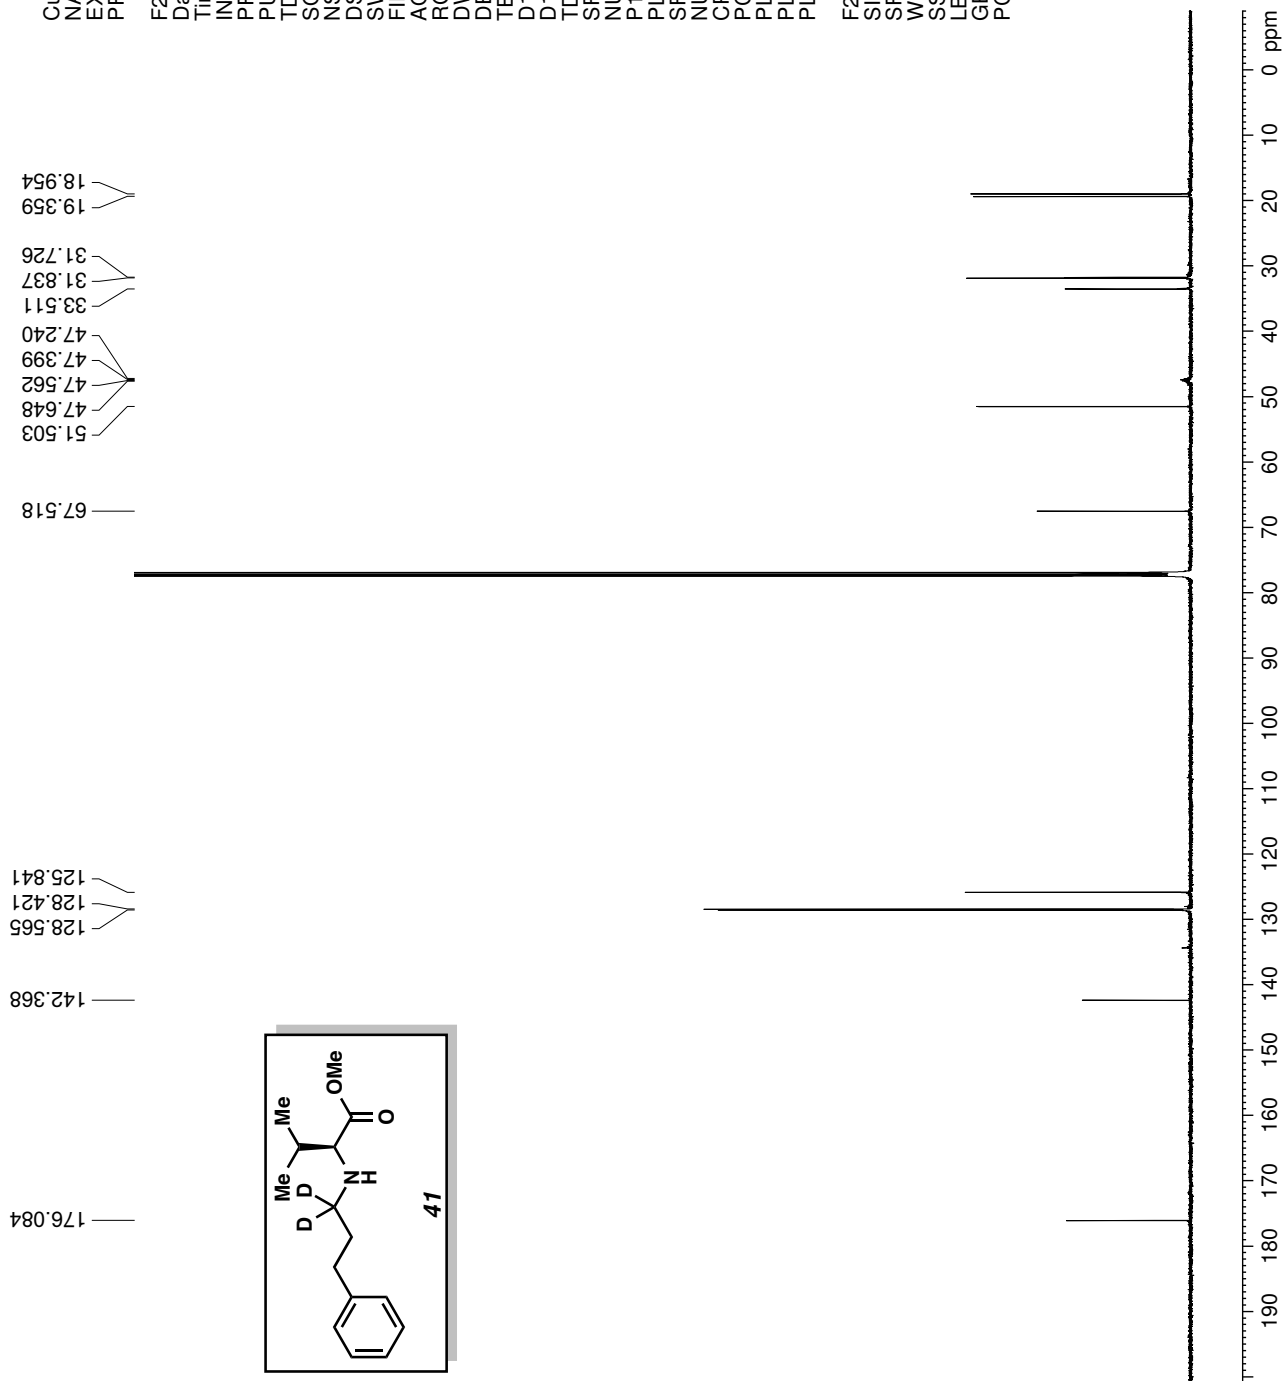



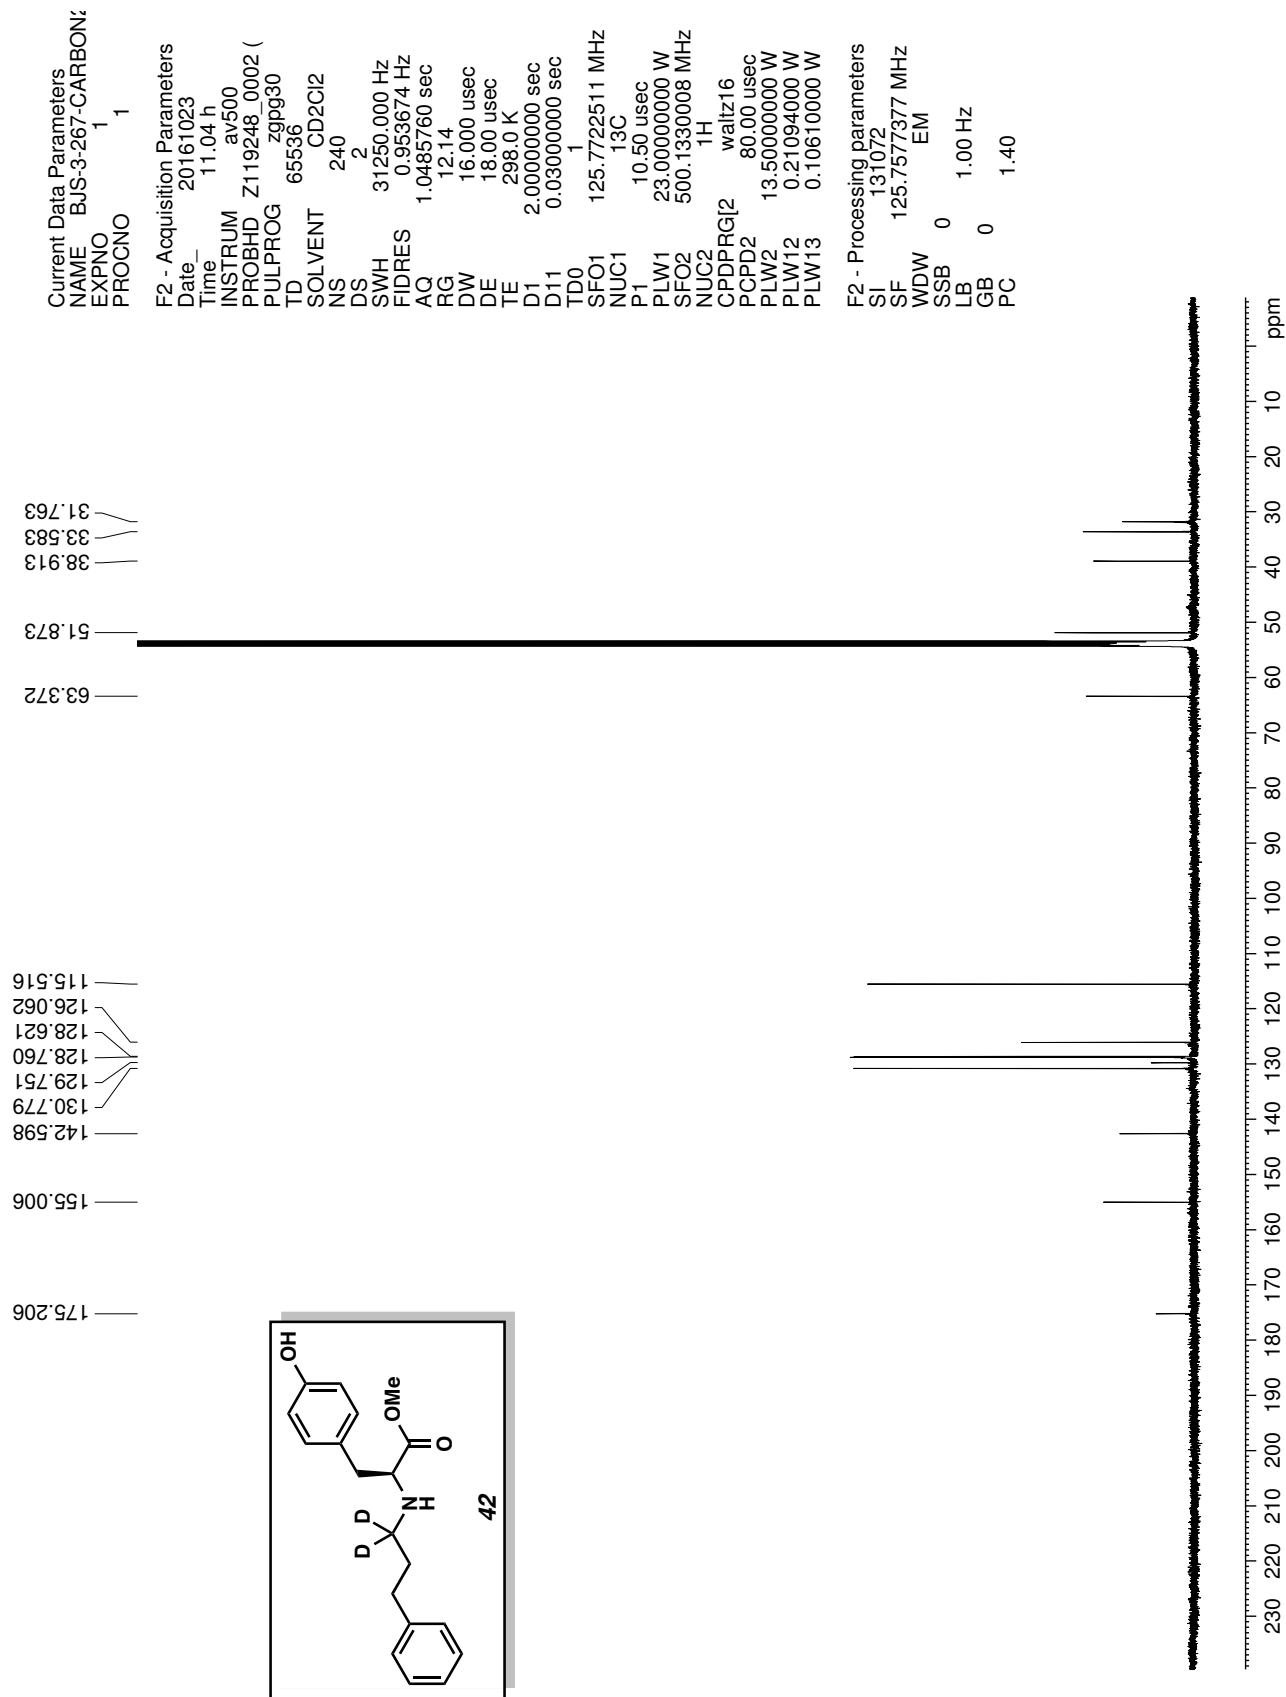

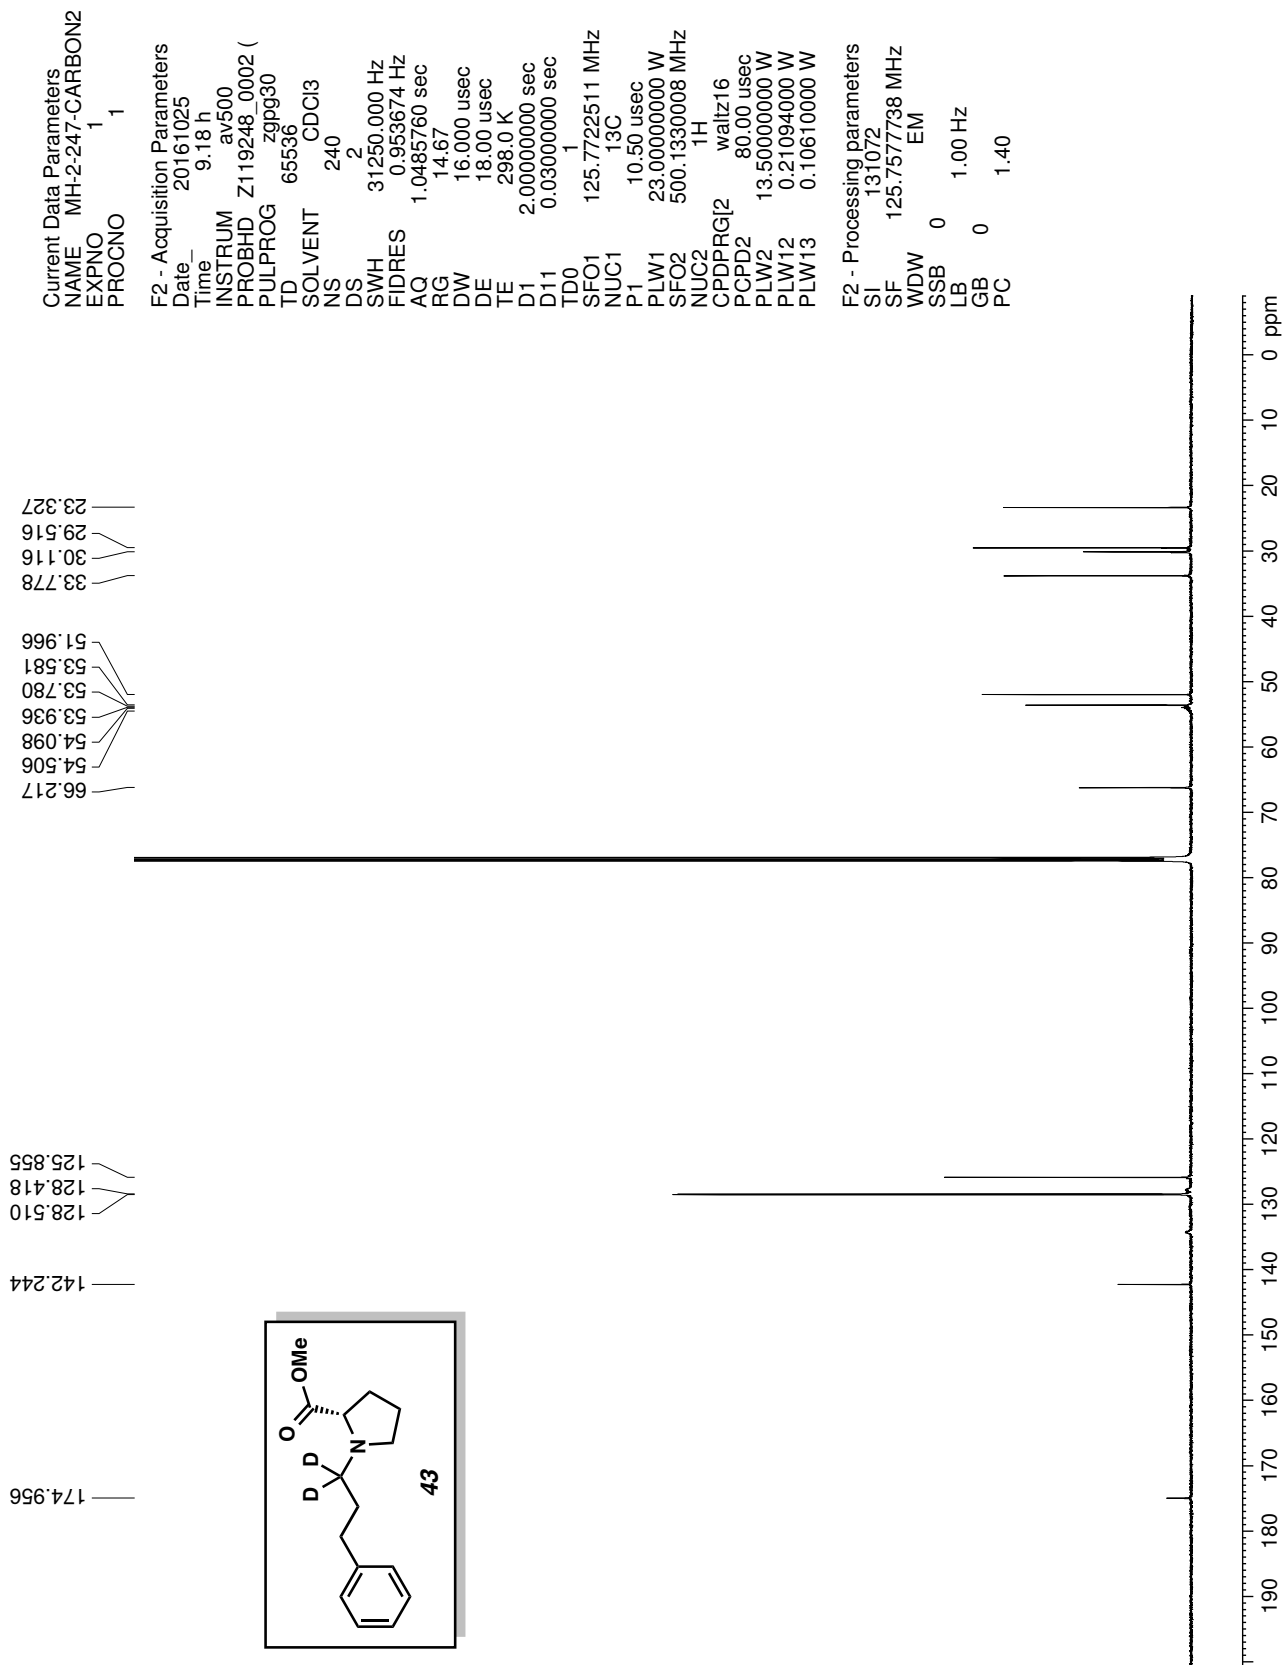

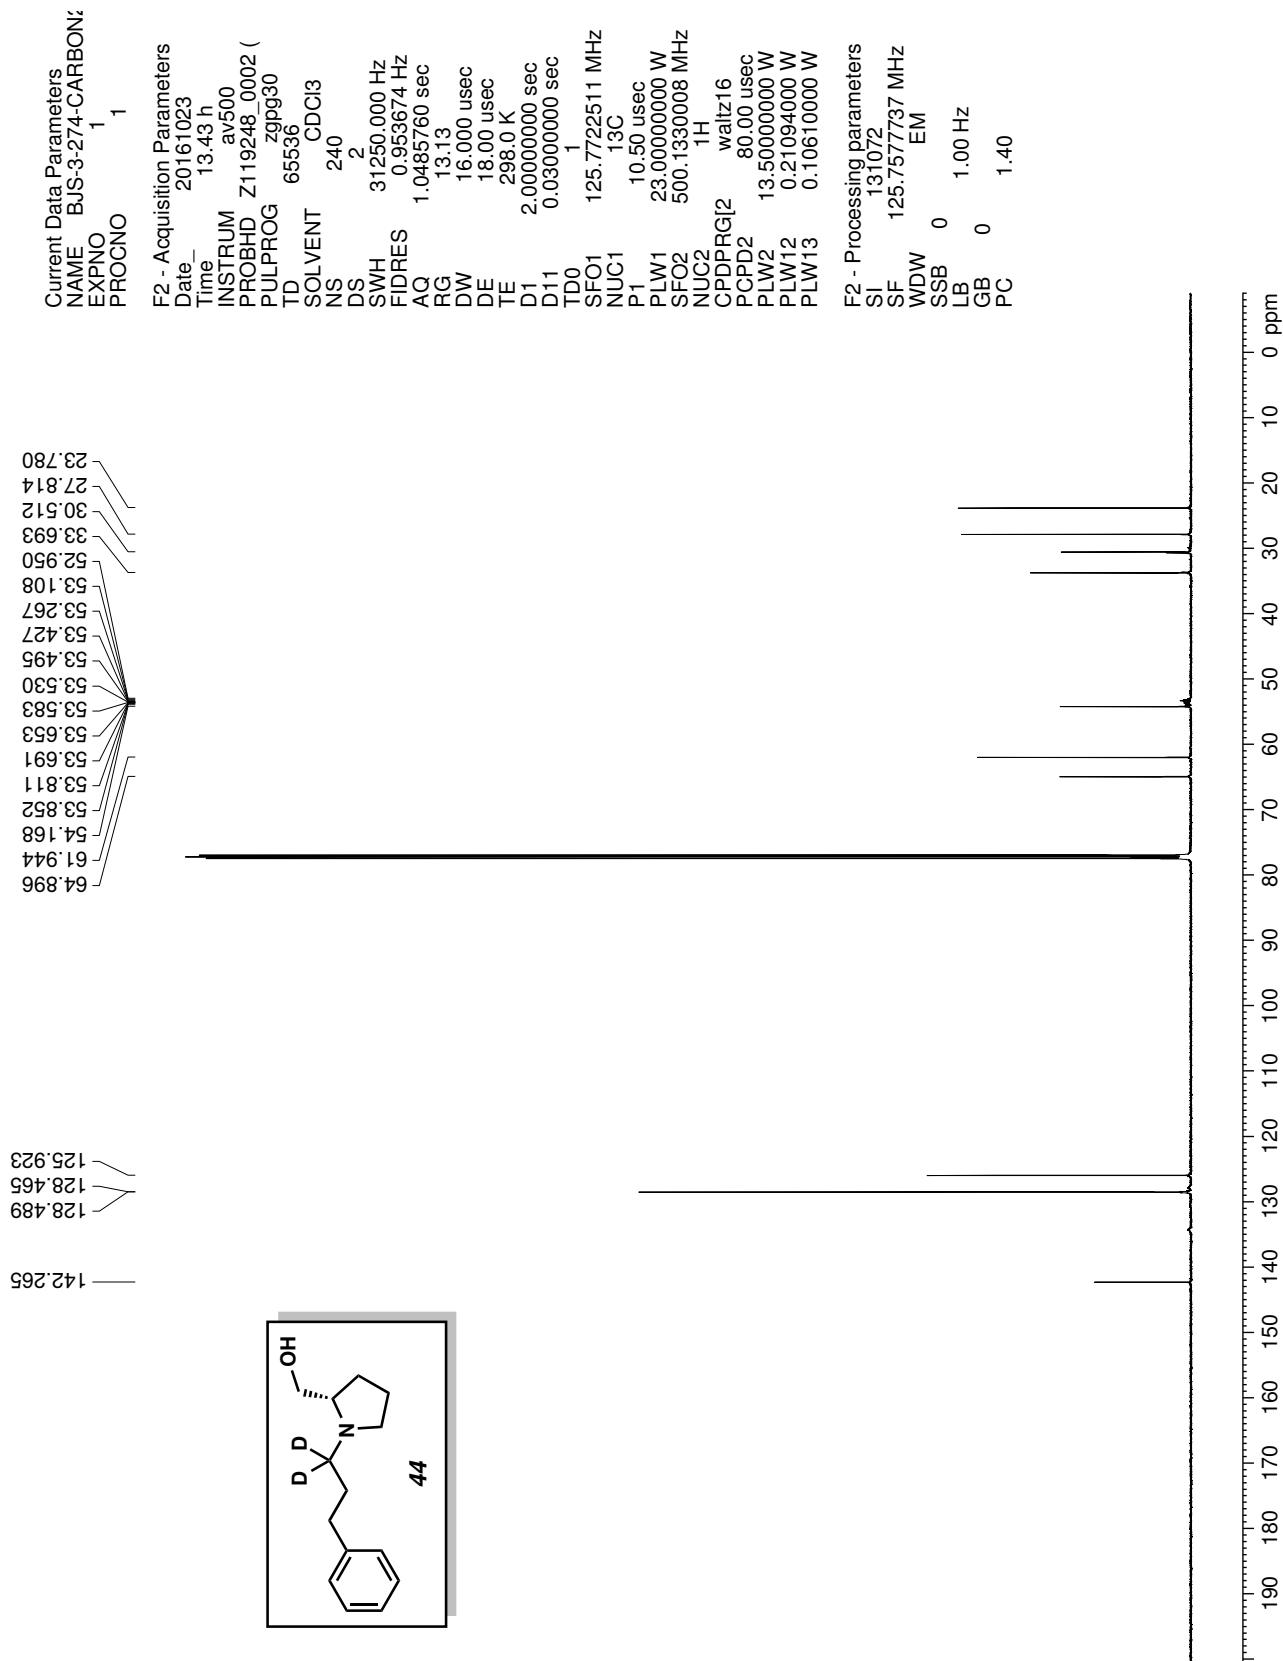

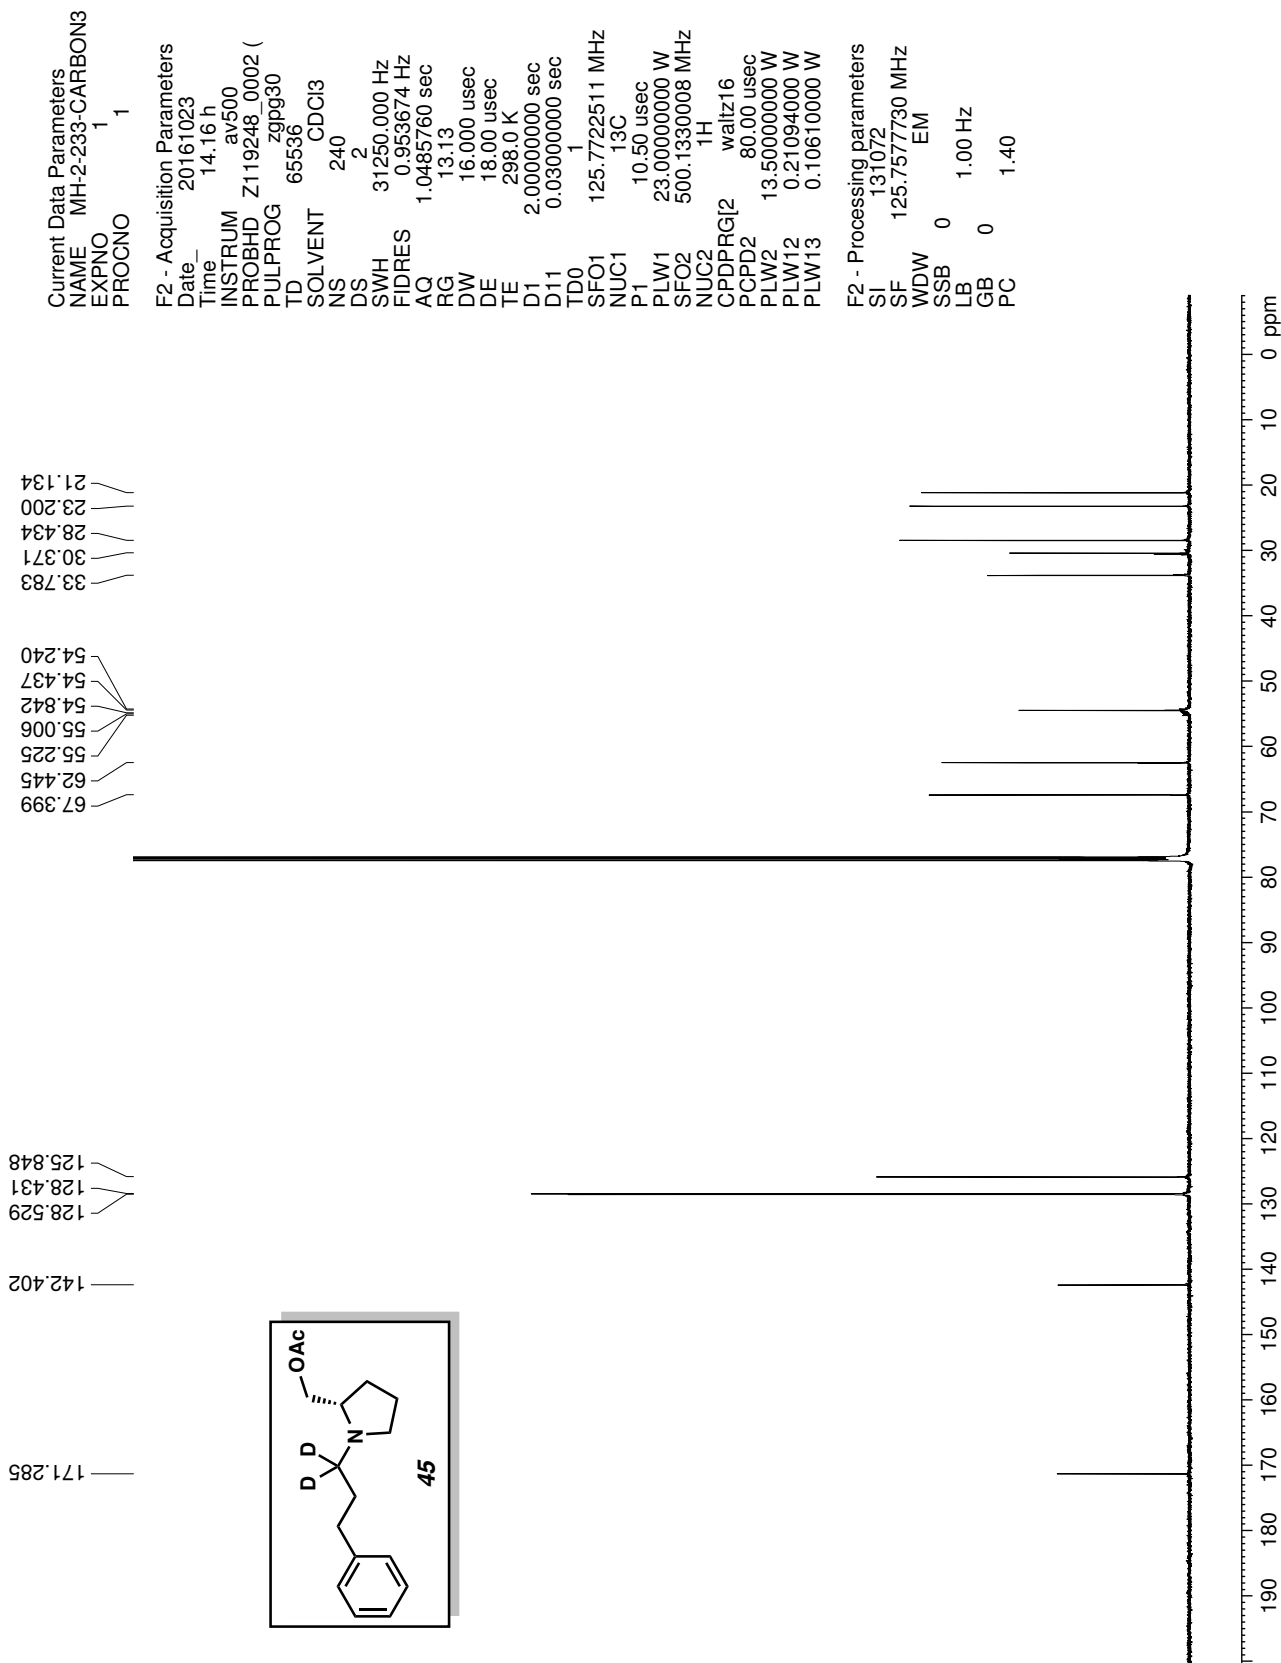

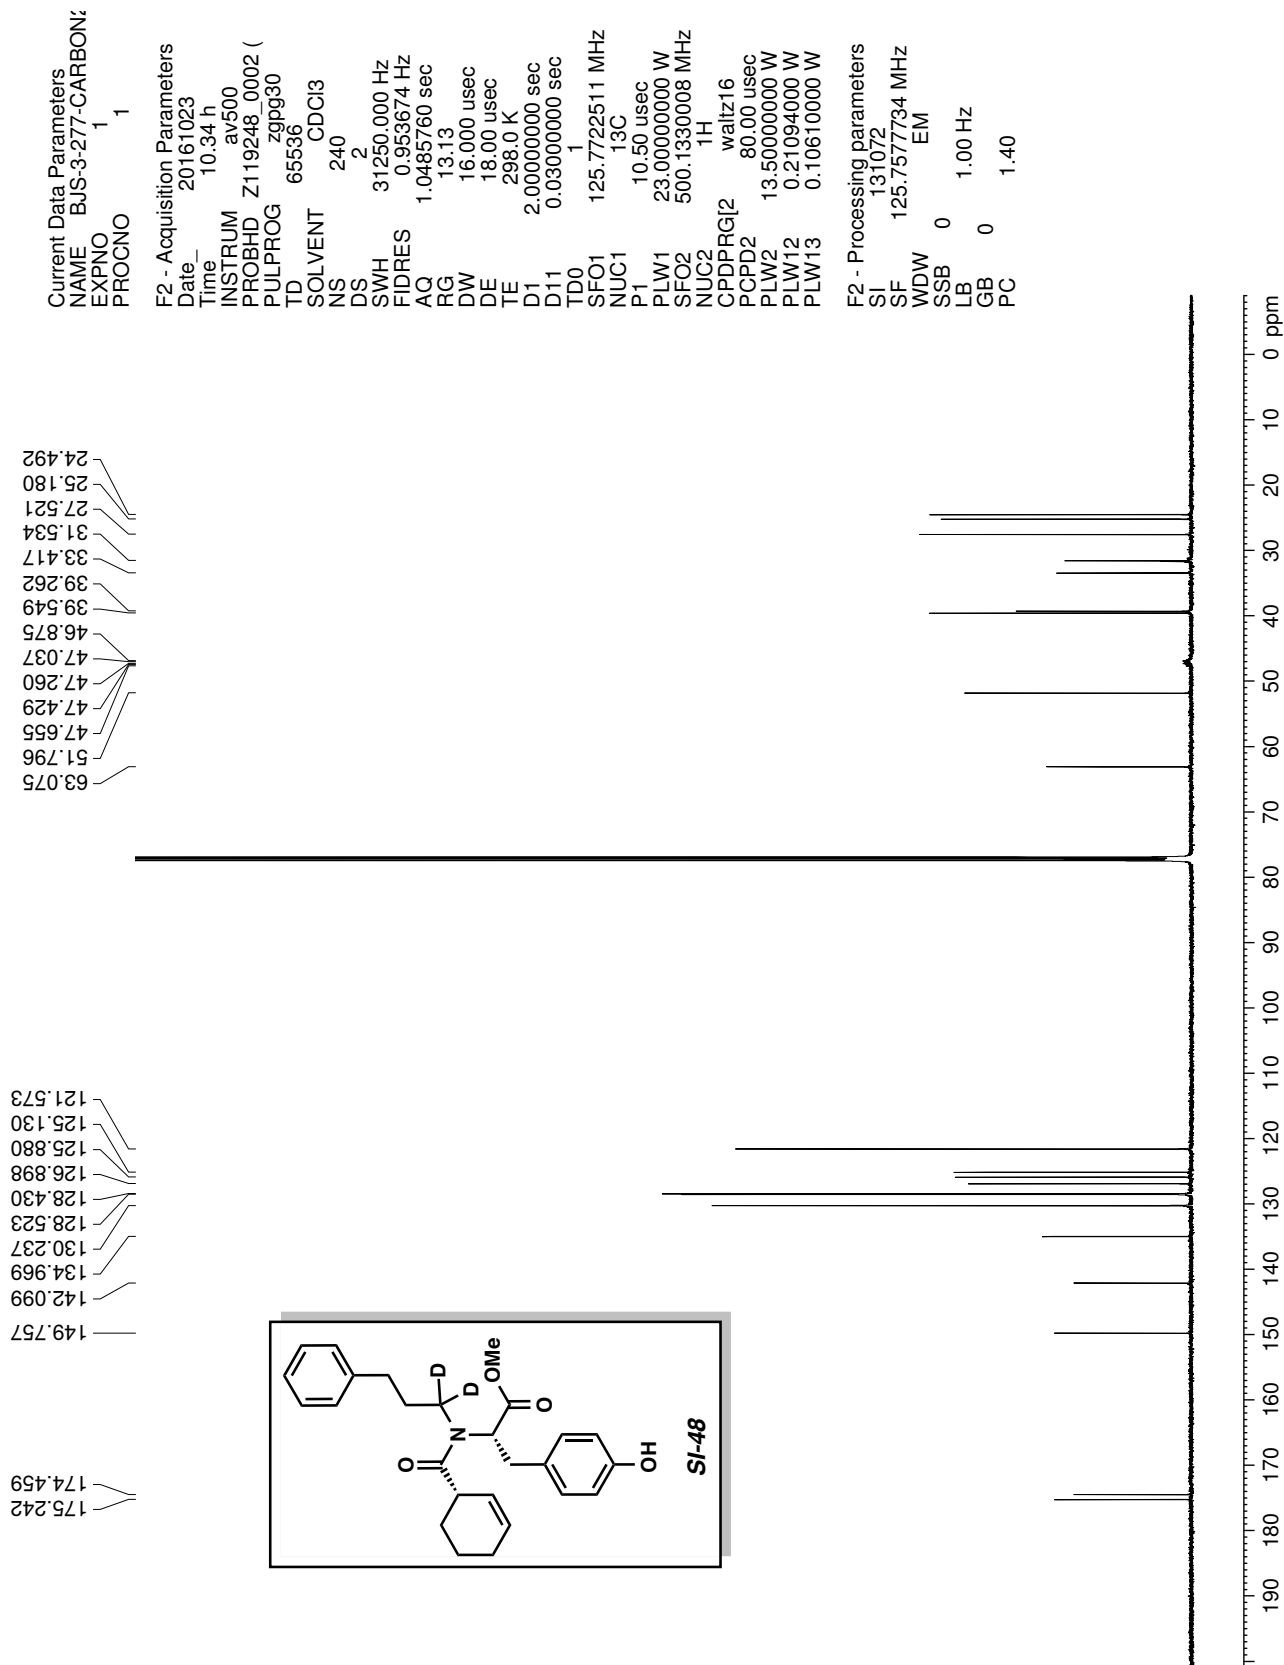

Supplement: NIHMS868684-supplement-Supporting_info.pdf [file NIHMS868684-supplement-Supporting_info.pdf]
